# Supplementary material for: LncRNA–miRNA–mRNA ceRNA network of different body colors in Plectropomus leopardus
Source: Frontiers journal article supplement (doi:10.3389/fmars.2023.1170762), 2023-05-12
Supplement: Table_1.xlsx [file Table_1.xlsx]

## Sheet: Supplemental table 1
Supplemental table 1 Primers used in the present study
Primers name	Sequence (5'→3')	Function
MSTRG.183.1-F	CCACAGACGCCTTGGTAGT	qRT-PCR
MSTRG.183.1-R	GCCCTATTGATTTGAACTTTGT	qRT-PCR
MSTRG.3042.1-F	GCTTCACATCCGTGGTTCC	qRT-PCR
MSTRG.3042.1-R	CTTGCTTCTTCCTTCTTCTGCT	qRT-PCR
MSTRG.12272.1-F	GCAGTCTCTTATCGGAATGTTT	qRT-PCR
MSTRG.12272.1-R	CTCTGTCGGCTTGTTGGC	qRT-PCR
MSTRG.13340.1-F	CACAGAGAGGAACCGCTCA	qRT-PCR
MSTRG.13340.1-R	GGAGAATGCCGTCATCGTT	qRT-PCR
MSTRG.13385.1-F	TCACCGTTCTCATCAGCCT	qRT-PCR
MSTRG.13385.1-R	TTGACTTGAAGCCGCCAT	qRT-PCR
MSTRG.16640.2-F	GCAGGCTATGTCAAATGGAA	qRT-PCR
MSTRG.16640.2-R	AAGTCGGTGGTAGTGGTGG	qRT-PCR
MSTRG.102.1-F	CATCCAATGACCTTGTTACGG	qRT-PCR
MSTRG.102.1-R	AGAAGTTCCTCCACCTCCCA	qRT-PCR
GLEAN_10017333-F	CCTGGACGCCTGCTCTCT	qRT-PCR
GLEAN_10017333-R	CAGATCCGTCGGACATGCT	qRT-PCR
GLEAN_10003424-F	GCCAATGGTCCAGCGTCT	qRT-PCR
GLEAN_10003424-R	AGGAACAGATGGGCGAGGT	qRT-PCR
GLEAN_10010431-F	TGCTATGAAATGTTTGGACGAG	qRT-PCR
GLEAN_10010431-R	AACCCTCTTTGACTTTGGCA	qRT-PCR
GLEAN_10002676-F	ATCAGGAACGTGACGCTCG	qRT-PCR
GLEAN_10002676-R	TTGACGACGAGGCGAATG	qRT-PCR
β-actin F	CACCACAGCCGAGAGGGA	Reference
β-actin R	TCTGGGCAACGGAACCTCT	Reference
miR-192-x-F	ACACTCCAGCTGGGCTGACCTATGAATT	qRT-PCR
miR-192-x-R	CTCAACTGGTGTCGTGGAGTCGGCAATTCAGTTGAGGGCTGTC	qRT-PCR
miR-466-x-F	ACACTCCAGCTGGG TGTGTGTGTGTGTG	qRT-PCR
miR-466-x-R	CTCAACTGGTGTCGTGGAGTCGGCAATTCAGTTGAGACACACACA	qRT-PCR
miR-187-x-F	ACACTCCAGCTGGG GGCTGCAACACAGG	qRT-PCR
miR-187-x-R	CTCAACTGGTGTCGTGGAGTCGGCAATTCAGTTGAGCCATGTCCT	qRT-PCR
novel-m0077-5p-F	ACACTCCAGCTGGG TAATCCTACTGTGT	qRT-PCR
novel-m0077-5p-R	CTCAACTGGTGTCGTGGAGTCGGCAATTCAGTTGAGAGCAATAGAC	qRT-PCR
novel-m0095-3p-F	ACACTCCAGCTGGG ATCATCATGCTCTG	qRT-PCR
novel-m0095-3p-R	CTCAACTGGTGTCGTGGAGTCGGCAATTCAGTTGAGAGTTCAGACA	qRT-PCR
miRNA-23F	ACACTCCAGCTGGGATCACATTGCCAGG	Reference
miRNA-23	CTCAACTGGTGTCGTGGAGTCGGCAATTCAGTTGAGGGAAATC	Reference

## Sheet: Supplemental table 2
Supplemental table 2 Differentially expressed lncRNAs
id	Black_mean	Red_mean	log2(fc)	PValue	FDR
MSTRG.6039.1	7.7	29.91	1.9577	2.88271e-43	1.0519e-39
MSTRG.8593.2	2.41	14.2733	2.56622	4.612e-40	8.41459e-37
MSTRG.20826.2	7.91667	0.956667	-3.0488	1.87679e-36	2.2828e-33
MSTRG.3046.1	1.17	4.52333	1.95088	1.22013e-21	1.11306e-18
MSTRG.102.1	7.89333	23.8133	1.59306	1.4963e-19	1.092e-16
MSTRG.9225.1	1.04	3.83667	1.88327	2.24978e-17	1.36824e-14
MSTRG.12888.1	3.70667	8.66	1.22424	5.57566e-17	2.90651e-14
MSTRG.19785.1	0.001	4.96667	12.2781	2.70254e-16	1.14369e-13
MSTRG.8593.3	2.16333	9.61667	2.15228	2.82082e-16	1.14369e-13
MSTRG.23488.2	16.9133	55.78	1.72159	2.00488e-15	7.17643e-13
MSTRG.1993.3	1.16333	2.84333	1.28932	2.16335e-15	7.17643e-13
MSTRG.16694.1	1857.01	601.203	-1.62706	2.10706e-14	6.40722e-12
MSTRG.1252.1	0.823333	3.28	1.99415	4.99075e-14	1.40086e-11
MSTRG.1567.1	4.54333	1.13667	-1.99894	8.20635e-14	2.13893e-11
MSTRG.22258.2	5.56333	0.236667	-4.55502	1.98394e-13	4.82628e-11
MSTRG.19760.1	0.65	3.57	2.45741	2.95903e-13	6.74843e-11
MSTRG.27807.1	162.797	44.72	-1.86408	6.95739e-13	1.49338e-10
MSTRG.26249.1	3.11	0.946667	-1.71599	3.09643e-12	6.27716e-10
MSTRG.20528.2	0.001	3.92333	11.9379	4.62173e-12	8.87616e-10
MSTRG.9531.3	3.18	0.001	-11.6348	5.88996e-12	1.07462e-09
MSTRG.30125.1	9.34333	1.39333	-2.7454	8.18864e-12	1.42287e-09
MSTRG.18932.1	13.5733	4.23667	-1.67977	1.01447e-11	1.68264e-09
MSTRG.5116.1	0.62	1.79333	1.5323	1.28076e-11	2.03195e-09
MSTRG.17850.1	3.39	12.32	1.86165	2.4296e-11	3.694e-09
MSTRG.8439.1	1.43	6.31333	2.14239	8.254e-11	1.11989e-08
MSTRG.1799.1	3.30667	8.71	1.3973	8.4325e-11	1.11989e-08
MSTRG.17068.1	0.636667	10.0233	3.97668	8.4701e-11	1.11989e-08
MSTRG.6291.1	0.716667	2.23333	1.63982	8.59332e-11	1.11989e-08
MSTRG.2778.2	4.99	0.001	-12.2848	8.98042e-11	1.12998e-08
MSTRG.27066.1	14.0833	42.9433	1.60845	1.30178e-10	1.5834e-08
MSTRG.26906.1	588.393	185.483	-1.66549	2.14669e-10	2.52686e-08
MSTRG.17213.1	614.59	235.947	-1.38116	2.29459e-10	2.61655e-08
MSTRG.24746.1	30.1633	60.8033	1.01135	2.84066e-10	3.14108e-08
MSTRG.7366.1	34.3533	10.27	-1.74201	5.10909e-10	5.48325e-08
MSTRG.20333.2	0.893333	2.38	1.41369	7.46314e-10	7.78086e-08
MSTRG.1551.1	2.89333	7.54	1.38183	1.94188e-09	1.96831e-07
MSTRG.26909.1	33.4367	8.55333	-1.96687	2.80474e-09	2.76608e-07
MSTRG.17850.2	3.7	15.2067	2.03911	2.94426e-09	2.82726e-07
MSTRG.23550.1	8.14667	0.376667	-4.43485	3.28724e-09	3.07568e-07
MSTRG.14315.1	0.923333	2.16	1.22611	3.63547e-09	3.31646e-07
MSTRG.5253.2	2.27	6.27667	1.46731	4.39278e-09	3.90957e-07
MSTRG.18964.1	77.6333	33.8067	-1.19937	1.75009e-08	1.48514e-06
MSTRG.26272.2	2.33	9.13667	1.97134	2.33186e-08	1.93385e-06
MSTRG.16429.1	1.02667	2.63	1.35709	2.45658e-08	1.99201e-06
MSTRG.16429.3	1.28667	2.64	1.0369	3.67574e-08	2.91582e-06
MSTRG.13385.1	17.92	4.99333	-1.8435	4.30801e-08	3.34467e-06
MSTRG.20520.2	0.38	1.95667	2.36433	4.95645e-08	3.67666e-06
MSTRG.16640.2	7.48667	2.29	-1.70898	4.96421e-08	3.67666e-06
MSTRG.24705.2	1.87333	0.001	-10.8714	5.0379e-08	3.67666e-06
MSTRG.12272.1	6.39	1.79667	-1.83049	5.81896e-08	4.16341e-06
MSTRG.29836.1	33.7267	9.20667	-1.87314	6.79723e-08	4.67983e-06
MSTRG.29741.1	25.2767	7.64333	-1.72553	8.00292e-08	5.4079e-06
MSTRG.30206.1	15.9233	40.8633	1.35966	9.29704e-08	6.16816e-06
MSTRG.26089.1	1.27667	5.98667	2.22937	1.18373e-07	7.71327e-06
MSTRG.22093.3	34.0267	2.01	-4.0814	1.3076e-07	8.37094e-06
MSTRG.5360.2	5.02	0.453333	-3.46904	1.39002e-07	8.74517e-06
MSTRG.23832.2	3.64667	10.6167	1.54168	1.98785e-07	1.21515e-05
MSTRG.1661.2	8.41	1.92333	-2.1285	1.99806e-07	1.21515e-05
MSTRG.23832.1	5.50333	17.8633	1.69862	2.73191e-07	1.63422e-05
MSTRG.30138.1	2.29	0.0833333	-4.78031	3.31244e-07	1.94953e-05
MSTRG.4981.2	1.91333	0.396667	-2.27009	3.40156e-07	1.9702e-05
MSTRG.8551.1	0.48	2.78333	2.53571	3.64066e-07	2.07574e-05
MSTRG.29796.2	8.29667	2.88667	-1.52313	5.82779e-07	3.27163e-05
MSTRG.23141.2	13.0033	3.86333	-1.75096	6.46652e-07	3.5752e-05
MSTRG.23832.3	0.923333	6.7	2.85924	7.25682e-07	3.95226e-05
MSTRG.23100.1	1.01	3.05	1.59445	9.76208e-07	5.16258e-05
MSTRG.17033.1	254.013	105.29	-1.27054	1.01511e-06	5.29162e-05
MSTRG.30354.4	7.46667	2.92667	-1.35121	1.13259e-06	5.8209e-05
MSTRG.22133.4	2.81333	0.776667	-1.85691	1.29398e-06	6.55794e-05
MSTRG.8914.1	4.78	1.38333	-1.78886	1.33696e-06	6.62307e-05
MSTRG.24608.3	0.07	2.00333	4.8389	1.34313e-06	6.62307e-05
MSTRG.21774.2	89.4133	31.1233	-1.52249	1.50919e-06	7.34271e-05
MSTRG.7556.4	0.506667	1.34667	1.41028	2.25776e-06	0.000108402
MSTRG.19151.1	5.66667	1.79333	-1.65986	3.03719e-06	0.000143931
MSTRG.17973.4	4.28	11.8267	1.46636	3.48497e-06	0.000158884
MSTRG.22929.1	0.436667	2.24333	2.36104	3.52689e-06	0.000158884
MSTRG.26774.1	40.75	13.4233	-1.60206	4.10897e-06	0.000182849
MSTRG.2242.1	2.26	0.72	-1.65025	4.82774e-06	0.000212246
MSTRG.15830.3	0.933333	2.47667	1.40794	5.67013e-06	0.000245921
MSTRG.17875.1	42.75	19.5833	-1.1263	7.04974e-06	0.000299122
MSTRG.29177.1	14.7333	7.29667	-1.01377	7.31465e-06	0.000303308
MSTRG.4466.2	1.69	3.89	1.20275	8.29107e-06	0.000339934
MSTRG.21720.1	0.81	3.13333	1.9517	8.47621e-06	0.000343663
MSTRG.3042.1	1.68667	0.376667	-2.16281	9.0958e-06	0.000364732
MSTRG.183.1	2.08667	0.996667	-1.06602	9.53292e-06	0.000378104
MSTRG.10454.1	173.31	77.8333	-1.15489	9.9899e-06	0.000389442
MSTRG.24133.1	1.49667	3.46	1.20902	1.13566e-05	0.000436213
MSTRG.20021.2	5.38	14.2733	1.40764	1.47791e-05	0.000544736
MSTRG.25342.1	3.7	1.18	-1.64874	1.58487e-05	0.000578319
MSTRG.20418.2	1.28	3.16333	1.3053	1.74341e-05	0.00062987
MSTRG.24427.3	11.99	3.82333	-1.64893	1.95362e-05	0.000692111
MSTRG.15620.1	0.563333	1.42333	1.33721	2.60024e-05	0.000895119
MSTRG.6280.1	2.43	0.59	-2.04217	2.89845e-05	0.000988451
MSTRG.24596.1	0.82	2.71667	1.72814	3.16257e-05	0.00106854
MSTRG.28421.2	1.45333	3.85667	1.40799	3.57438e-05	0.0011966
MSTRG.719.1	3.01667	1.26667	-1.25192	4.49063e-05	0.00145012
MSTRG.28094.1	43.1933	16.9533	-1.34924	4.80121e-05	0.00153681
MSTRG.21171.1	0.0233333	1.24667	5.73954	5.20068e-05	0.0016502
MSTRG.16556.1	3.15667	1.31	-1.26884	5.50853e-05	0.00172479
MSTRG.26848.1	0.001	1.64333	10.6824	5.53028e-05	0.00172479
MSTRG.24170.2	0.703333	5.16333	2.87602	5.60901e-05	0.00173452
MSTRG.2491.1	2.81	0.45	-2.64257	7.07141e-05	0.00211505
MSTRG.25514.1	2.49	0.263333	-3.24118	7.32499e-05	0.00217308
MSTRG.19291.1	1.75333	5.99	1.77246	7.64394e-05	0.00224941
MSTRG.20021.1	1.4	4.94	1.81908	9.95467e-05	0.00290597
MSTRG.18403.1	0.996667	2.49	1.32096	0.000111001	0.00321463
MSTRG.17969.1	3.16667	0.98	-1.69211	0.000126104	0.00359496
MSTRG.14060.2	1.95	0.47	-2.05274	0.000142954	0.00404371
MSTRG.24775.3	1.24333	3.16333	1.34723	0.000194131	0.00540752
MSTRG.26107.1	4.42	9.17333	1.0534	0.00020573	0.00560231
MSTRG.17989.2	1.46	3.75	1.36092	0.00025875	0.00679265
MSTRG.30354.2	2.38667	5.59333	1.22871	0.000271986	0.0070389
MSTRG.20528.1	4.91333	2.11333	-1.21718	0.000271988	0.0070389
MSTRG.15785.1	128.817	63.9033	-1.01136	0.000313456	0.00784797
MSTRG.19010.1	1.34	3.68667	1.46008	0.000329359	0.00814489
MSTRG.23604.6	0.603333	1.45667	1.27164	0.000330349	0.00814489
MSTRG.13340.1	1.69333	0.833333	-1.0229	0.000361558	0.0087955
MSTRG.21801.1	3.96	1.28667	-1.62186	0.000422618	0.0102128
MSTRG.19916.1	3.46	1.3	-1.41226	0.000435731	0.0104604
MSTRG.27272.3	0.99	3.95667	1.99879	0.000467471	0.0110766
MSTRG.21897.4	0.143333	1.6	3.48063	0.000481643	0.0112661
MSTRG.22258.1	2.22333	5.07667	1.19116	0.00048653	0.0113079
MSTRG.28949.2	8.85333	2.25667	-1.97203	0.000495921	0.0113812
MSTRG.17946.1	2.81667	6.25	1.14987	0.000511589	0.0116292
MSTRG.28068.2	5.35333	13.9833	1.3852	0.000586481	0.0131293
MSTRG.20052.1	1.03667	0.236667	-2.13102	0.000636224	0.0140702
MSTRG.23636.2	5.63667	12.09	1.1009	0.000676438	0.0147668
MSTRG.6433.2	3.15	0.996667	-1.66017	0.000692474	0.0149517
MSTRG.19046.1	4.68333	1.89333	-1.30661	0.000714764	0.0152525
MSTRG.23141.3	4.73	1.10667	-2.09562	0.000727101	0.0154255
MSTRG.11511.1	1.4	0.0733333	-4.25481	0.000757254	0.0158059
MSTRG.23888.1	0.05	1.69667	5.08463	0.000758027	0.0158059
MSTRG.5907.1	6.01	12.8167	1.09258	0.000765334	0.0158676
MSTRG.2778.1	2.27667	6.09333	1.42031	0.000779062	0.016061
MSTRG.18627.1	1.48667	0.0166667	-6.47897	0.00084385	0.0172989
MSTRG.30292.1	0.776667	2.11	1.44188	0.000857925	0.0174892
MSTRG.15030.1	2.94	1.26667	-1.21478	0.000894564	0.0181348
MSTRG.18677.1	0.653333	0.05	-3.70782	0.000924229	0.0186095
MSTRG.24432.2	1.51333	3.68	1.28198	0.000928182	0.0186095
MSTRG.23881.1	1.5	4.88	1.70192	0.000955366	0.0190499
MSTRG.21024.1	2.89667	0.743333	-1.96231	0.00108188	0.0212245
MSTRG.24789.2	1.72333	3.66667	1.08927	0.00114656	0.0221365
MSTRG.27944.3	1.03333	0.001	-10.0131	0.00130507	0.0248031
MSTRG.16756.1	3.75333	1.72667	-1.12018	0.00135133	0.0254176
MSTRG.8540.1	1.92	4.48667	1.22454	0.00137619	0.0257464
MSTRG.30033.1	2.29	0.936667	-1.28974	0.00138293	0.0257464
MSTRG.3145.1	16.72	7.52667	-1.15149	0.00169749	0.030513
MSTRG.23028.2	0.136667	0.993333	2.86162	0.00177904	0.0316669
MSTRG.23551.1	1.82	0.146667	-3.63333	0.00189347	0.0332176
MSTRG.28111.1	4.41	1.01667	-2.11693	0.00205073	0.0356338
MSTRG.23604.5	0.203333	3.36333	4.04797	0.00209032	0.0361496
MSTRG.21971.1	2.60667	0.946667	-1.46128	0.00222489	0.0382954
MSTRG.13951.1	1.54333	5.77	1.90252	0.00228325	0.0389325
MSTRG.21241.1	0.8	1.64667	1.04148	0.00240657	0.0408445
MSTRG.23280.1	0.586667	2.49667	2.08939	0.00245818	0.0413359
MSTRG.17514.1	4.67667	1.33667	-1.80684	0.00249402	0.0417462
MSTRG.7698.1	1.41667	0.0733333	-4.27189	0.00251759	0.0419484
MSTRG.21387.1	0.001	1.17667	10.2005	0.00256757	0.042394
MSTRG.23390.1	1.19	3.30667	1.47442	0.00260291	0.0427839
MSTRG.18682.1	2.78333	1.22	-1.18993	0.0026809	0.0438682
MSTRG.29484.2	0.001	0.373333	8.54432	0.00277918	0.0451614
MSTRG.22784.1	0.456667	0.94	1.04152	0.00294889	0.0468771
MSTRG.23366.1	2.87333	0.44	-2.70715	0.00296191	0.0468771
MSTRG.4743.1	0.62	1.57667	1.34654	0.00298134	0.0468771
MSTRG.17850.4	1.78	4.81333	1.43516	0.00298539	0.0468771
MSTRG.24489.1	1.19333	2.64	1.14554	0.00299325	0.0468771
MSTRG.23309.1	1.16667	2.76667	1.24576	0.00319918	0.0496758

## Sheet: Supplemental table 3
Supplemental table 3 Differentially expressed mRNA of black-colored and red-colored coral grouper
id	Black_mean	Red_mean	log2(fc)	PValue	FDR	Symbol	Description
Dxb_GLEAN_10008591	8.90333	49.7433	2.48209	5.28572e-140	1.21455e-135	Jdp2	jun dimerization protein 2-like [Perca flavescens]
Dxb_GLEAN_10008593	27.3233	648.227	4.56829	2.77404e-124	3.1871e-120	fos	proto-oncogene c-Fos [Larimichthys crocea]
Dxb_GLEAN_10006448	48.4933	8.97	-2.43461	1.06473e-75	8.15509e-72	chs-2	chitin synthase chs-1-like [Sparus aurata]
Dxb_GLEAN_10001717	25.2	138.24	2.45568	1.87244e-66	1.07562e-62	ier2	immediate early response gene 2 protein [Anabas testudineus]
Dxb_GLEAN_10019406	27.6533	159.317	2.52637	2.06255e-54	9.47863e-51	junb	transcription factor jun-B-like isoform X2 [Sander lucioperca]
Dxb_GLEAN_10000506	51.3767	5.3	-3.27705	5.45604e-53	2.08948e-49	H2-K1	major histocompatibility class I receptor [Sander vitreus]
Dxb_GLEAN_10020446	5.07667	73.2767	3.8514	1.00384e-45	3.29516e-42	Rgs2	PREDICTED: regulator of G-protein signaling 5-like [Stegastes partitus]
Dxb_GLEAN_10008308	5.75	0.16	-5.16742	2.97159e-45	8.53515e-42	--	trichohyalin-like [Perca flavescens]
Dxb_GLEAN_10016107	7.09333	46.14	2.70148	1.51217e-38	3.86073e-35	nr4a1	nuclear receptor subfamily 4 group A member 1-like [Perca flavescens]
Dxb_GLEAN_10018815	17.5933	153.503	3.12517	2.61195e-36	6.00175e-33	FOSB	protein fosB isoform X1 [Seriola dumerili]
Dxb_GLEAN_10014015	40.4533	9.11	-2.15074	4.66167e-34	9.73781e-31	DCT	L-dopachrome tautomerase [Cottoperca gobio]
MSTRG.28160	97.7567	25.07	-1.96323	2.99592e-32	5.73668e-29	--	XP_031136491.1 protein FAM111A-like isoform X1 [Sander lucioperca]
Dxb_GLEAN_10003162	17.8433	90.99	2.35032	6.34491e-32	1.12149e-28	--	RING finger protein 223-like [Sander lucioperca]
Dxb_GLEAN_10012497	6.97333	24.5667	1.81678	3.49044e-31	5.72881e-28	Klf2	Krueppel-like factor 4 [Etheostoma spectabile]
Dxb_GLEAN_10007692	11.8233	39.8133	1.75161	1.00137e-29	1.53397e-26	ndel1b	nuclear distribution protein nudE-like 1-B [Cottoperca gobio]
Dxb_GLEAN_10000992	140.723	448.163	1.67116	1.14023e-29	1.63751e-26	ZFP36	mRNA decay activator protein ZFP36-like [Anarrhichthys ocellatus]
Dxb_GLEAN_10004512	31.04	104.27	1.74812	4.71537e-29	6.04181e-26	CSRNP1	cysteine/serine-rich nuclear protein 1-like [Cottoperca gobio]
Dxb_GLEAN_10002249	75.0867	15.07	-2.31688	4.7329e-29	6.04181e-26	MFAP4	microfibril-associated glycoprotein 4-like isoform X2 [Astatotilapia calliptera]
Dxb_GLEAN_10013046	17.3367	49.76	1.52116	1.0679e-28	1.29148e-25	PPP1R15B	protein phosphatase 1 regulatory subunit 15A-like [Sander lucioperca]
MSTRG.5364	10.5733	2.64333	-2	1.32211e-28	1.51897e-25	--	AEM37661.1 dopamine receptor, partial [Epinephelus bruneus]
Dxb_GLEAN_10019607	1.11333	7.94333	2.83486	2.20273e-27	2.41021e-24	ttc39b	tetratricopeptide repeat protein 39B-like [Sander lucioperca]
Dxb_GLEAN_10016017	119.813	53.26	-1.16966	3.29111e-27	3.43741e-24	CHIT1	Chitinase-3-like protein 1 [Scophthalmus maximus]
Dxb_GLEAN_10018136	5.16	20.95	2.02151	1.00853e-26	1.00756e-23	--	epigen, partial [Epinephelus bruneus]
Dxb_GLEAN_10021949	4.48667	16.9733	1.91955	3.60634e-26	3.45277e-23	PRELID3B	PRELI domain containing protein 3B-like isoform X2 [Larimichthys crocea]
Dxb_GLEAN_10013275	20.8833	62.8467	1.58948	9.77975e-26	8.9148e-23	phlda2	PREDICTED: pleckstrin homology-like domain family A member 2 [Stegastes partitus]
Dxb_GLEAN_10014083	32.1333	94.42	1.55502	1.00873e-25	8.9148e-23	SIK2	serine/threonine-protein kinase SIK2-like [Cottoperca gobio]
Dxb_GLEAN_10008590	2.35	15.3467	2.70719	1.75665e-25	1.49497e-22	--	leucine-rich repeat-containing protein 74A-like [Perca flavescens]
Dxb_GLEAN_10002676	1.94667	14.24	2.87087	7.22897e-25	5.9324e-22	--	myelin-oligodendrocyte glycoprotein-like [Anarrhichthys ocellatus]
Dxb_GLEAN_10014714	64.1967	238.67	1.89445	1.54296e-24	1.22255e-21	dusp1-a	MAP kinase phosphatase 1 [Epinephelus coioides]
Dxb_GLEAN_10001439	69.1467	17.88	-1.95131	1.7574e-24	1.34605e-21	--	pancreatic secretory granule membrane major glycoprotein GP2-like [Oreochromis aureus]
Dxb_GLEAN_10019941	12.5533	50.5467	2.00955	9.13585e-24	6.77173e-21	DUSP5	PREDICTED: dual specificity protein phosphatase 5 [Stegastes partitus]
Dxb_GLEAN_10021355	0.626667	9.40667	3.90791	2.05414e-23	1.43031e-20	G0s2	G0/G1 switch protein 2-like [Sander lucioperca]
Dxb_GLEAN_10012723	5.59333	1.08667	-2.3638	2.23741e-23	1.51209e-20	Trpm1	transient receptor potential cation channel subfamily M member 1-like isoform X2 [Anarrhichthys ocellatus]
Dxb_GLEAN_10001916	70.6567	21.88	-1.69121	4.91862e-23	3.22914e-20	FCGBP	Alpha-tectorin [Dicentrarchus labrax]
Dxb_GLEAN_10016131	6.90667	1.86333	-1.8901	5.45379e-23	3.48104e-20	RSBN1	lysine-specific demethylase 9-like [Sander lucioperca]
Dxb_GLEAN_10019495	11.0367	30.8667	1.48375	7.64473e-23	4.74759e-20	Tns4	tensin-4 [Sander lucioperca]
Dxb_GLEAN_10018701	3.70667	8.66	1.22424	4.83699e-22	2.92485e-19	--	aryl-hydrocarbon-interacting -like 1 [Labeo rohita]
Dxb_GLEAN_10020578	20.62	60.9733	1.56413	1.00196e-21	5.90335e-19	PTGS2	PREDICTED: prostaglandin G/H synthase 2 [Lates calcarifer]
Dxb_GLEAN_10009386	12.77	2.32333	-2.45849	1.8137e-21	1.0315e-18	ddit4	DNA damage-inducible transcript 4 protein-like [Sparus aurata]
Dxb_GLEAN_10001450	127.213	317.37	1.31892	1.84052e-21	1.0315e-18	junb	PREDICTED: transcription factor jun-B-like [Lates calcarifer]
Dxb_GLEAN_10021354	20.4333	47.9167	1.2296	2.03488e-21	1.11327e-18	LAMB3	laminin subunit beta-3 [Cottoperca gobio]
Dxb_GLEAN_10007654	27.6833	99.59	1.84698	6.06903e-21	3.24312e-18	MAFK	transcription factor MafK [Seriola dumerili]
Dxb_GLEAN_10007821	6.66333	24.7667	1.89408	7.00264e-21	3.63074e-18	SOCS3	suppressor of cytokine signaling 3, partial [Siniperca chuatsi]
MSTRG.19875	4.39333	0.206667	-4.40994	7.11042e-21	3.63074e-18	--	KAE8277716.1 hypothetical protein D5F01_LYC24263 [Larimichthys crocea]
Dxb_GLEAN_10021488	33.14	11.9833	-1.46754	8.24298e-21	4.11755e-18	PMEL	melanocyte protein PMEL-like isoform X2 [Etheostoma spectabile]
Dxb_GLEAN_10017260	248.937	622.267	1.32175	5.82679e-20	2.84868e-17	MCL1	induced myeloid leukemia cell differentiation protein Mcl-1 homolog [Perca flavescens]
Dxb_GLEAN_10008935	11.0767	30.0867	1.4416	1.59327e-19	7.47145e-17	ATF3	cyclic AMP-dependent transcription factor ATF-3 [Labrus bergylta]
Dxb_GLEAN_10001555	20.4967	6.08333	-1.75246	1.72232e-19	7.91512e-17	H1-5	histone H1-like [Cottoperca gobio]
Dxb_GLEAN_10010815	11.4667	30.6067	1.4164	2.08428e-19	9.39072e-17	EGR1	early growth response protein 1-like [Seriola dumerili]
Dxb_GLEAN_10015000	4.58333	24.1833	2.39954	3.39434e-19	1.4999e-16	Fosl1	fos-related antigen 1 [Anabas testudineus]
Dxb_GLEAN_10020267	5.11667	19.38	1.92129	5.41181e-19	2.34627e-16	Noct	nocturnin-like isoform X2 [Sander lucioperca]
Dxb_GLEAN_10011664	11.5833	28.3633	1.29198	5.89432e-19	2.50814e-16	LAMC2	laminin subunit gamma-2-like [Sander lucioperca]
Dxb_GLEAN_10003172	0.001	5.77667	12.496	1.06219e-18	4.43762e-16	plcd4	1-phosphatidylinositol 4,5-bisphosphate phosphodiesterase delta-4 isoform X1 [Mastacembelus armatus]
MSTRG.10743	2.12	0.606667	-1.80509	1.34142e-18	5.43527e-16	NCAM2	XP_018549020.1 PREDICTED: neural cell adhesion molecule 2 isoform X2 [Lates calcarifer]
Dxb_GLEAN_10005129	48.64	119.663	1.29877	1.34829e-18	5.43527e-16	Klf4	Krueppel-like factor 4 isoform X2 [Sander lucioperca]
Dxb_GLEAN_10022275	10.86	25.9533	1.2569	3.62983e-18	1.43804e-15	TRIB2	tribbles homolog 3-like [Sander lucioperca]
Dxb_GLEAN_10018772	6.27333	1.76667	-1.8282	4.97949e-18	1.90698e-15	TMPRSS13	PREDICTED: transmembrane protease serine 13-like [Lates calcarifer]
Dxb_GLEAN_10009345	0.31	1.92333	2.63327	2.77034e-17	1.04355e-14	CFAP43	cilia- and flagella-associated protein 43 isoform X3 [Perca flavescens]
Dxb_GLEAN_10015109	6.26	21.1567	1.75688	3.6756e-17	1.36222e-14	HS3ST1	heparan sulfate glucosamine 3-O-sulfotransferase 1 [Sparus aurata]
Dxb_GLEAN_10005988	217.15	60.3133	-1.84814	3.87412e-17	1.40393e-14	Tecta	PREDICTED: LOW QUALITY PROTEIN: IgGFc-binding protein-like [Lates calcarifer]
Dxb_GLEAN_10002603	3.82667	14.43	1.91491	3.91032e-17	1.40393e-14	myc	transcriptional regulator Myc-B-like isoform X2 [Sparus aurata]
Dxb_GLEAN_10013067	6.31333	14.8933	1.23819	1.45064e-16	5.05042e-14	AMPD3	AMP deaminase 3-like isoform X1 [Seriola lalandi dorsalis]
Dxb_GLEAN_10012029	47.5633	106.263	1.15972	2.35139e-16	8.06422e-14	Lama3	laminin subunit alpha-3 isoform X1 [Sander lucioperca]
Dxb_GLEAN_10010019	4.79667	14.53	1.59893	2.02798e-15	6.65699e-13	Plek2	pleckstrin-2 [Seriola lalandi dorsalis]
Dxb_GLEAN_10003836	6.52667	2.62333	-1.31495	2.96015e-15	9.58004e-13	TRIM21	PREDICTED: E3 ubiquitin-protein ligase TRIM39-like [Lates calcarifer]
Dxb_GLEAN_10020133	15.4367	4.73	-1.70645	4.98687e-15	1.59151e-12	tyrp1	5,6-dihydroxyindole-2-carboxylic acid oxidase-like isoform X1 [Parambassis ranga]
Dxb_GLEAN_10001362	7.75667	19.1833	1.30634	5.39904e-15	1.69944e-12	nfil3	PREDICTED: nuclear factor interleukin-3-regulated protein-like [Lates calcarifer]
Dxb_GLEAN_10020628	11.5	24.11	1.068	1.05108e-14	3.26375e-12	JUND	transcription factor jun-D [Larimichthys crocea]
Dxb_GLEAN_10016085	30.03	77.86	1.37448	1.11261e-14	3.40873e-12	--	CCAAT/enhancer-binding protein beta-like [Acanthochromis polyacanthus]
MSTRG.7056	19.9767	9.24667	-1.11131	1.15423e-14	3.48973e-12	atad1b	XP_031695533.1 ATPase family AAA domain-containing protein 1-B [Anarrhichthys ocellatus]
Dxb_GLEAN_10005882	31.6367	12.51	-1.33852	2.0105e-14	5.99965e-12	ddit4	DNA damage-inducible transcript 4 protein [Perca flavescens]
Dxb_GLEAN_10019402	37.5867	18.7633	-1.0023	2.72844e-14	8.0377e-12	ACP5	tartrate-resistant acid phosphatase type 5 [Larimichthys crocea]
Dxb_GLEAN_10011839	44.6633	100.65	1.17218	4.03526e-14	1.14472e-11	Klf2	Krueppel-like factor 2 [Perca flavescens]
Dxb_GLEAN_10009440	14.1467	31.3867	1.14969	5.29906e-14	1.4849e-11	--	arginine vasopressin-induced protein 1 isoform X1 [Anarrhichthys ocellatus]
Dxb_GLEAN_10021475	1.60667	5	1.63786	6.39082e-14	1.76926e-11	IGFBP6	PREDICTED: insulin-like growth factor-binding protein 3 [Stegastes partitus]
Dxb_GLEAN_10008124	8.36333	20.7233	1.30911	1.59698e-13	4.26692e-11	CBX7	LOW QUALITY PROTEIN: chromobox protein homolog 7-like [Cottoperca gobio]
Dxb_GLEAN_10022068	11.0333	26.7167	1.27587	1.78455e-13	4.71326e-11	EPHA2	ephrin type-A receptor 2-like [Anarrhichthys ocellatus]
Dxb_GLEAN_10007567	2.18333	9.39333	2.1051	1.99157e-13	5.14184e-11	ARL5B	ADP-ribosylation factor-like protein 5B [Archocentrus centrarchus]
MSTRG.26556	29.8967	9.48	-1.65703	2.2212e-13	5.67097e-11	Tecta	KAF1373883.1 hypothetical protein PFLUV_G00243550 [Perca fluviatilis]
Dxb_GLEAN_10011899	4.39333	1.51333	-1.53759	4.21161e-13	1.04059e-10	CYSLTR2	chemokine XC receptor 1-like [Myripristis murdjan]
Dxb_GLEAN_10017683	18.33	45.9667	1.32638	4.61234e-13	1.12747e-10	NEURL3	E3 ubiquitin-protein ligase NEURL3-like [Cottoperca gobio]
Dxb_GLEAN_10012343	23.3	49.83	1.09668	6.857e-13	1.65853e-10	RGS13	regulator of G-protein signaling 21-like [Sander lucioperca]
Dxb_GLEAN_10017706	3.06667	10.15	1.72674	1.04041e-12	2.46458e-10	Egr3	early growth response protein 3 [Seriola dumerili]
Dxb_GLEAN_10008721	0.523333	3.5	2.74155	1.23659e-12	2.89943e-10	--	Leucine-rich alpha-2-glycoprotein [Liparis tanakae]
Dxb_GLEAN_10016178	6.27333	0.001	-12.615	1.48593e-12	3.44886e-10	TAF8	transcription initiation factor TFIID subunit 8 [Seriola lalandi dorsalis]
MSTRG.23095	2.11	0.153333	-3.7825	1.97627e-12	4.53977e-10	--	-
Dxb_GLEAN_10018070	3.57333	10.4333	1.54586	1.99546e-12	4.53977e-10	Dusp2	dual specificity protein phosphatase 2-like [Amphiprion ocellaris]
Dxb_GLEAN_10009946	1.52333	3.86667	1.34386	2.21325e-12	4.98589e-10	foxi1c	forkhead box protein I1c-like [Sparus aurata]
Dxb_GLEAN_10000766	4.12667	10.2933	1.31866	2.53832e-12	5.66267e-10	--	titin-like isoform X4 [Sander lucioperca]
Dxb_GLEAN_10016341	0.206667	1.41	2.77032	2.6884e-12	5.93981e-10	sim1a	single-minded homolog 1-A-like [Sander lucioperca]
Dxb_GLEAN_10007760	789.27	218.123	-1.85537	2.71737e-12	5.94665e-10	MYH2	myosin heavy chain, fast skeletal muscle [Larimichthys crocea]
Dxb_GLEAN_10014481	4.13333	8.28333	1.00291	2.8317e-12	6.13838e-10	Noct	nocturnin isoform X1 [Seriola dumerili]
Dxb_GLEAN_10015533	4.13333	9.24333	1.16111	2.99719e-12	6.43639e-10	Errfi1	ERBB receptor feedback inhibitor 1 [Larimichthys crocea]
Dxb_GLEAN_10010338	2.99667	6.87	1.19695	3.64264e-12	7.75004e-10	Alk	LOW QUALITY PROTEIN: leukocyte tyrosine kinase receptor [Cottoperca gobio]
Dxb_GLEAN_10012990	13.8933	33.32	1.262	3.87864e-12	8.17647e-10	CDKN1C	cyclin-dependent kinase inhibitor 1C-like [Perca flavescens]
MSTRG.10768	10.9633	5.34667	-1.03597	6.51704e-12	1.33704e-09	--	XP_029304632.1 LOW QUALITY PROTEIN: T-cell surface antigen CD2-like [Cottoperca gobio]
Dxb_GLEAN_10011976	33.1067	71.1133	1.103	8.86786e-12	1.7566e-09	Cebpd	CCAAT/enhancer-binding protein delta [Mastacembelus armatus]
Dxb_GLEAN_10008869	3.77	8.93	1.2441	1.20367e-11	2.36393e-09	--	dicentracin-like isoform X2 [Seriola dumerili]
Dxb_GLEAN_10012940	7.96667	2.15333	-1.8874	1.71351e-11	3.3367e-09	--	SLAM family member 9 [Perca flavescens]
Dxb_GLEAN_10001161	5.52333	1.62667	-1.76362	1.88359e-11	3.60676e-09	Trim39	E3 ubiquitin-protein ligase TRIM21-like [Cottoperca gobio]
Dxb_GLEAN_10013270	4.58	9.37333	1.03321	2.05945e-11	3.91092e-09	--	-
Dxb_GLEAN_10010895	7.77333	17.3533	1.15861	2.32397e-11	4.37706e-09	BTG3	PREDICTED: protein BTG3 [Lates calcarifer]
MSTRG.13294	4.84	1.53667	-1.6552	3.57704e-11	6.68238e-09	SRF	XP_008297602.1 PREDICTED: serum response factor isoform X3 [Stegastes partitus]
MSTRG.25300	487.58	142.707	-1.77259	4.82798e-11	8.87499e-09	MYH6	TNN43809.1 hypothetical protein EYF80_046016 [Liparis tanakae]
Dxb_GLEAN_10020618	22.03	9.98333	-1.14188	8.15394e-11	1.47528e-08	ARRDC2	arrestin domain-containing protein 2 isoform X2 [Larimichthys crocea]
Dxb_GLEAN_10015604	40	18.4967	-1.11273	9.7976e-11	1.73176e-08	hes4-b	transcription factor HES-4 isoform X1 [Sander lucioperca]
Dxb_GLEAN_10002278	9.69333	1.53667	-2.65719	1.27339e-10	2.16501e-08	--	L-rhamnose-binding lectin SML-like [Sparus aurata]
Dxb_GLEAN_10003936	32.76	15.5133	-1.07843	1.28141e-10	2.16501e-08	PARP11	E3 ubiquitin-protein ligase DTX1-like isoform X1 [Echeneis naucrates]
Dxb_GLEAN_10011149	44.21	15.8333	-1.48141	1.51647e-10	2.54346e-08	ASL	argininosuccinate lyase [Cottoperca gobio]
Dxb_GLEAN_10007758	411.54	121.773	-1.75683	1.78554e-10	2.97305e-08	--	myosin-7-like protein [Labeo rohita]
Dxb_GLEAN_10010510	2.04333	0.001	-10.9967	1.88591e-10	3.11758e-08	PLD4	phospholipase D4 [Sander lucioperca]
Dxb_GLEAN_10006032	22.13	10.32	-1.10056	1.96936e-10	3.23229e-08	PRSS36	transmembrane protease serine 9-like isoform X1 [Betta splendens]
Dxb_GLEAN_10009942	5.23	1.62667	-1.68489	2.02951e-10	3.30738e-08	Ky	kyphoscoliosis peptidase [Sander lucioperca]
Dxb_GLEAN_10012238	10.7633	3.74667	-1.52245	2.28785e-10	3.65071e-08	RAB3A	ras-related protein Rab-3A-like [Anabas testudineus]
Dxb_GLEAN_10004207	23.3933	10.4667	-1.1603	2.32519e-10	3.6847e-08	ST8SIA6	PREDICTED: alpha-2,8-sialyltransferase 8E-like [Notothenia coriiceps]
Dxb_GLEAN_10015984	21.45	8.98	-1.25619	2.39252e-10	3.76543e-08	SARG	specifically androgen-regulated gene protein-like isoform X1 [Sander lucioperca]
Dxb_GLEAN_10013653	26.9267	70.5133	1.38886	3.26592e-10	5.07056e-08	COL6A3	LOW QUALITY PROTEIN: collagen alpha-3(VI) chain [Perca flavescens]
Dxb_GLEAN_10017126	0.0733333	0.97	3.72544	4.30853e-10	6.51326e-08	SLC45A4	solute carrier family 45 member 4-like isoform X1 [Sander lucioperca]
Dxb_GLEAN_10022359	0.58	3.34	2.52572	4.50282e-10	6.76247e-08	ASIP	agouti-signaling protein [Labrus bergylta]
Dxb_GLEAN_10005812	7.07	3.16	-1.16179	5.39285e-10	7.99463e-08	Nlrc3	NACHT, LRR and PYD domains-containing protein 3-like isoform X1 [Anarrhichthys ocellatus]
Dxb_GLEAN_10019899	6.39	2.07	-1.62619	5.86377e-10	8.63703e-08	Slc25a10	mitochondrial dicarboxylate carrier-like [Cottoperca gobio]
Dxb_GLEAN_10021506	18.9967	44.8	1.23775	5.93814e-10	8.69087e-08	nr4a1	Nuclear receptor subfamily 4 group A member 1 [Collichthys lucidus]
Dxb_GLEAN_10000996	0.001	2.12	11.0498	6.80796e-10	9.77709e-08	Mr1	major histocompatibility complex class I-related gene protein-like [Anabas testudineus]
Dxb_GLEAN_10005865	10.43	4.19	-1.31572	7.56415e-10	1.07956e-07	Adam9	disintegrin and metalloproteinase domain-containing protein 9-like isoform X1 [Sander lucioperca]
Dxb_GLEAN_10016361	5.40667	2.17	-1.31704	7.70385e-10	1.09271e-07	MC5R	melanocortin receptor 5-like [Acanthochromis polyacanthus]
MSTRG.23419	22.43	8.17667	-1.45584	8.70612e-10	1.21981e-07	--	-
Dxb_GLEAN_10007753	18.98	6.56667	-1.53125	9.95498e-10	1.38634e-07	MYH1	Myosin heavy chain, fast skeletal muscle [Takifugu flavidus]
Dxb_GLEAN_10005468	24.4067	11.4267	-1.09487	1.16361e-09	1.60104e-07	ANXA1	annexin A1-like [Seriola dumerili]
Dxb_GLEAN_10007115	8.56667	3.81333	-1.16768	1.42183e-09	1.94469e-07	ST3GAL1	CMP-N-acetylneuraminate-beta-galactosamide-alpha-2,3-sialyltransferase 1-like [Mastacembelus armatus]
MSTRG.2177	4.93	2.31	-1.09369	1.46888e-09	1.98541e-07	--	-
Dxb_GLEAN_10014250	0.106667	7.16	6.06878	1.50295e-09	2.01957e-07	--	AN1-type zinc finger protein 2B-like, partial [Protobothrops mucrosquamatus]
Dxb_GLEAN_10006821	0.203333	2.97667	3.87178	1.67423e-09	2.23666e-07	hoxa13a	homeobox protein Hox-A13 [Echeneis naucrates]
Dxb_GLEAN_10012520	0.836667	1.79333	1.09992	1.83469e-09	2.42285e-07	PAPPA2	pappalysin-2 [Perca flavescens]
Dxb_GLEAN_10007922	24.6367	10.7733	-1.19334	2.36516e-09	3.05318e-07	Noxo1	NADPH oxidase organizer 1-like [Cottoperca gobio]
MSTRG.22844	0.0866667	4.35	5.64939	3.39447e-09	4.30929e-07	SIAE	KAF1393812.1 hypothetical protein PFLUV_G00019940 [Perca fluviatilis]
Dxb_GLEAN_10003557	6.09667	2.19333	-1.4749	3.77534e-09	4.76647e-07	secA	protein translocase subunit SecA-like [Mastacembelus armatus]
Dxb_GLEAN_10007866	11.82	4.88333	-1.27529	4.57806e-09	5.7171e-07	PRKAR1B	PREDICTED: cAMP-dependent protein kinase type I-beta regulatory subunit [Stegastes partitus]
MSTRG.3320	2.35667	10.1533	2.10713	4.68835e-09	5.82319e-07	--	XP_010780195.1 PREDICTED: interleukin-1 receptor type 2-like [Notothenia coriiceps]
MSTRG.18472	1.34	2.8	1.06319	4.95799e-09	6.12499e-07	--	-
Dxb_GLEAN_10000490	4.34	13.41	1.62754	5.25366e-09	6.4212e-07	hba2	hemoglobin embryonic subunit alpha-like [Anabas testudineus]
Dxb_GLEAN_10001979	7.68	3.47333	-1.14479	5.40511e-09	6.57136e-07	TRIM21	E3 ubiquitin-protein ligase TRIM21-like [Perca flavescens]
Dxb_GLEAN_10005989	6.48333	2.43667	-1.41183	6.12071e-09	7.32509e-07	Tecta	PREDICTED: LOW QUALITY PROTEIN: IgGFc-binding protein-like [Lates calcarifer]
Dxb_GLEAN_10004190	10.2	21.8933	1.10192	6.69738e-09	7.9737e-07	--	PREDICTED: fish-egg lectin-like [Lates calcarifer]
Dxb_GLEAN_10003956	7.64333	3.28667	-1.21758	7.02799e-09	8.32419e-07	TRIM27	tripartite motif protein 39 [Epinephelus coioides]
MSTRG.6647	13.0333	5.91333	-1.14016	9.38804e-09	1.08949e-06	--	TDH03984.1 hypothetical protein EPR50_G00147850 [Perca flavescens]
Dxb_GLEAN_10011901	5.96667	1.72	-1.79452	9.92743e-09	1.14056e-06	XCR1	chemokine XC receptor 1-like [Sander lucioperca]
Dxb_GLEAN_10017301	14.7733	3.55	-2.0571	1.02617e-08	1.1731e-06	METTL27	methyltransferase-like protein 27 [Maylandia zebra]
Dxb_GLEAN_10000638	5.00333	10.9533	1.13041	1.13769e-08	1.27522e-06	SELL	E-selectin-like isoform X3 [Sander lucioperca]
Dxb_GLEAN_10003078	8.8	3.19667	-1.46094	1.39683e-08	1.55808e-06	SLC6A13	PREDICTED: sodium- and chloride-dependent GABA transporter 2-like isoform X1 [Lates calcarifer]
Dxb_GLEAN_10018659	7.18	2.22	-1.69342	1.64457e-08	1.80809e-06	tyr	tyrosinase [Seriola lalandi dorsalis]
Dxb_GLEAN_10012150	1.75333	6.09333	1.79713	1.72674e-08	1.88938e-06	FAM102B	LOW QUALITY PROTEIN: protein FAM102B-like [Cottoperca gobio]
Dxb_GLEAN_10014392	4.15667	10.7333	1.3686	1.75745e-08	1.91387e-06	ARL4C	ADP-ribosylation factor-like protein 4C [Seriola dumerili]
MSTRG.22693	40.8433	18.4533	-1.14622	1.78472e-08	1.9344e-06	--	XP_030016354.1 uncharacterized protein LOC115437283 isoform X3 [Sphaeramia orbicularis]
Dxb_GLEAN_10020699	36.6	11.15	-1.7148	2.1605e-08	2.30588e-06	--	receptor-transporting protein 3-like [Perca flavescens]
Dxb_GLEAN_10013553	21.27	8.37333	-1.34495	2.16952e-08	2.30588e-06	Rep15	rab15 effector protein [Perca flavescens]
Dxb_GLEAN_10007951	5	1.60667	-1.63786	2.17763e-08	2.30588e-06	--	uncharacterized LOC103392932 precursor [Cynoglossus semilaevis]
MSTRG.20085	31.1067	14.4067	-1.11049	2.26068e-08	2.38284e-06	Masp1	XP_031155484.1 complement C1s subcomponent-like [Sander lucioperca]
Dxb_GLEAN_10008915	12.5033	5.48	-1.19006	2.75893e-08	2.84281e-06	--	Fatty acid-binding protein, brain [Takifugu flavidus]
Dxb_GLEAN_10010690	36.7233	16.19	-1.18159	3.05694e-08	3.12188e-06	Mslnl	mesothelin isoform X5 [Astatotilapia calliptera]
MSTRG.16539	31.33	10.6867	-1.55173	3.24552e-08	3.29981e-06	--	XP_031179668.1 uncharacterized protein LOC116067384 [Sander lucioperca]
Dxb_GLEAN_10007110	0.001	0.603333	9.23681	3.5079e-08	3.55086e-06	COL9A1	PREDICTED: collagen alpha-3(IX) chain-like [Paralichthys olivaceus]
Dxb_GLEAN_10005589	2.32333	8.22667	1.82411	3.62401e-08	3.6523e-06	ch25h	cholesterol 25-hydroxylase [Sparus aurata]
MSTRG.22527	6.69667	2.03667	-1.71723	3.78236e-08	3.79524e-06	--	XP_031139445.1 tapasin-like [Sander lucioperca]
Dxb_GLEAN_10011044	8.46	2.58333	-1.71142	4.48505e-08	4.48076e-06	Trim11	tripartite motif-containing protein 16 [Larimichthys crocea]
Dxb_GLEAN_10016559	11.2633	4.97333	-1.17935	5.40339e-08	5.32872e-06	COLEC10	collectin-10 isoform X1 [Sander lucioperca]
Dxb_GLEAN_10005939	4.32	1.79333	-1.26839	6.03548e-08	5.90141e-06	Adam11	disintegrin and metalloproteinase domain-containing protein 11 isoform X4 [Perca flavescens]
Dxb_GLEAN_10008100	0.75	0.123333	-2.60433	6.21821e-08	6.02877e-06	iaaA	Isoaspartyl peptidase [Liparis tanakae]
Dxb_GLEAN_10007949	15.36	6.83	-1.16922	6.78312e-08	6.52144e-06	--	GATA zinc finger domain-containing protein 14-like [Anarrhichthys ocellatus]
Dxb_GLEAN_10016931	25.9467	10.55	-1.29831	7.35296e-08	7.03985e-06	C1S	LOW QUALITY PROTEIN: mannan-binding lectin serine protease 2-like [Cottoperca gobio]
Dxb_GLEAN_10002859	0.001	0.776667	9.60115	7.73933e-08	7.34852e-06	--	sterile alpha motif domain-containing protein 3-like [Astyanax mexicanus]
Dxb_GLEAN_10002190	0.22	4.02	4.19162	9.49342e-08	8.69083e-06	il1b	interleukin-1 beta, partial [Epinephelus coioides]
Dxb_GLEAN_10000808	0.001	1.38667	10.4374	1.04034e-07	9.37444e-06	CTRB1	PREDICTED: chymotrypsin B [Lates calcarifer]
Dxb_GLEAN_10005194	4.78	1.58667	-1.59101	1.2391e-07	1.10356e-05	MLANA	melanoma antigen recognized by T-cells 1 isoform X2 [Etheostoma spectabile]
Dxb_GLEAN_10010431	19.55	7.47667	-1.3867	1.75091e-07	1.5182e-05	Cd209d	C-type lectin domain family 4 member C Blood dendritic cell antigen 2 [Larimichthys crocea]
Dxb_GLEAN_10015944	15.1767	6.9	-1.13719	1.78051e-07	1.53362e-05	DSC2	B-cadherin-like [Mastacembelus armatus]
Dxb_GLEAN_10007069	0.22	0.496667	1.17477	1.79746e-07	1.54112e-05	Csmd3	CUB and sushi domain-containing protein 3 [Seriola lalandi dorsalis]
Dxb_GLEAN_10018028	5.54667	2.59	-1.09867	2.16449e-07	1.81517e-05	Znf366	zinc finger protein 366-like [Cottoperca gobio]
Dxb_GLEAN_10008319	0.313333	1.98	2.65973	2.48367e-07	2.0166e-05	Sox11	transcription factor Sox-11-like [Sparus aurata]
Dxb_GLEAN_10017404	3.02667	1.47	-1.04191	2.52364e-07	2.03467e-05	ccdc125	coiled-coil domain-containing protein 125 isoform X2 [Cottoperca gobio]
Dxb_GLEAN_10020668	3.64667	1.52667	-1.25619	2.55531e-07	2.053e-05	Slc5a5	PREDICTED: LOW QUALITY PROTEIN: sodium/iodide cotransporter [Lates calcarifer]
MSTRG.7087	16.6033	7.59	-1.1293	2.8425e-07	2.27578e-05	Lect2	CAG01034.1 unnamed protein product [Tetraodon nigroviridis]
Dxb_GLEAN_10022161	6.78	2.26	-1.58496	3.23029e-07	2.56836e-05	ITIH3	inter-alpha-trypsin inhibitor heavy chain H3-like [Sander lucioperca]
MSTRG.4125	3.24333	1.37	-1.2433	3.57898e-07	2.80512e-05	--	XP_010787219.1 PREDICTED: uncharacterized protein LOC104960761 [Notothenia coriiceps]
Dxb_GLEAN_10016628	1.63333	4.65333	1.51045	3.5891e-07	2.80512e-05	HAS1	hyaluronan synthase 1 [Sander lucioperca]
Dxb_GLEAN_10021525	0.346667	20.3733	5.87699	3.67366e-07	2.86147e-05	Fmod	fibromodulin-like [Perca flavescens]
MSTRG.22711	3.03667	0.146667	-4.37188	4.12383e-07	3.16914e-05	PMEL	XP_031168435.1 melanocyte protein PMEL-like [Sander lucioperca]
Dxb_GLEAN_10020887	4.88667	10.08	1.04457	4.17643e-07	3.19886e-05	SELE	E-selectin-like [Perca flavescens]
Dxb_GLEAN_10015654	3.88667	1.18	-1.71975	4.82439e-07	3.67069e-05	KIAA1324	UPF0577 protein KIAA1324 homolog isoform X1 [Perca flavescens]
Dxb_GLEAN_10005181	0.01	1.20333	6.91089	5.03744e-07	3.80757e-05	tbx5a	T-box transcription factor TBX5-A-like [Perca flavescens]
Dxb_GLEAN_10020975	0.526667	1.60667	1.60911	5.10701e-07	3.8475e-05	Hcn2	Potassium/sodium hyperpolarization-activated cyclic nucleotide-gated channel 2 [Collichthys lucidus]
Dxb_GLEAN_10018532	17.2967	7.24667	-1.2551	5.3256e-07	3.99907e-05	mmp13	collagenase 3-like [Sander lucioperca]
Dxb_GLEAN_10017419	3.62333	1.58333	-1.19435	5.35365e-07	4.00704e-05	HMGCR	3-hydroxy-3-methylglutaryl-CoA reductase [Epinephelus lanceolatus]
Dxb_GLEAN_10009812	0.00666667	0.436667	6.03342	5.78188e-07	4.25035e-05	Pol	LINE-1 reverse transcriptase -like protein [Triplophysa tibetana]
Dxb_GLEAN_10007988	3.05667	8.04	1.39524	5.78971e-07	4.25035e-05	ier2	immediate early response gene 2 protein-like [Sander lucioperca]
Dxb_GLEAN_10019673	2.71	0.34	-2.99469	5.96422e-07	4.36452e-05	FGFBP1	Fibroblast growth factor-binding protein 1 [Liparis tanakae]
MSTRG.16695	17.2367	7.60667	-1.18014	6.09791e-07	4.44818e-05	--	XP_014851517.1 PREDICTED: uncharacterized protein LOC106923140 [Poecilia mexicana]
Dxb_GLEAN_10004674	4.75667	1.45333	-1.71059	6.34405e-07	4.61309e-05	CTNND2	catenin delta-2 isoform X1 [Larimichthys crocea]
Dxb_GLEAN_10016859	0.0466667	2.18333	5.548	6.65159e-07	4.82146e-05	Prss1	pancreatic trypsinogen [Epinephelus coioides]
MSTRG.21149	2.70333	0.426667	-2.66356	7.20218e-07	5.18783e-05	--	KAE8279582.1 hypothetical protein D5F01_LYC21705 [Larimichthys crocea]
Dxb_GLEAN_10008480	23.6367	11.75	-1.00837	7.71786e-07	5.50749e-05	Rhov	rho-related GTP-binding protein RhoV [Cynoglossus semilaevis]
Dxb_GLEAN_10011760	0.55	1.35667	1.30256	9.26427e-07	6.39434e-05	Abca4	retinal-specific phospholipid-transporting ATPase ABCA4-like isoform X3 [Sparus aurata]
Dxb_GLEAN_10013922	41.1467	17.1667	-1.26117	9.80621e-07	6.68626e-05	Ifih1	melanoma differentiation associated protein-5 [Epinephelus coioides]
Dxb_GLEAN_10018559	1164.36	483.437	-1.26814	1.02414e-06	6.96232e-05	--	complement C1q and tumor necrosis factor-related protein 9 [Larimichthys crocea]
Dxb_GLEAN_10001726	4.46	1.71	-1.38305	1.065e-06	7.177e-05	Trim16	tripartite motif-containing protein 16-like [Larimichthys crocea]
Dxb_GLEAN_10023095	0.176667	1.20333	2.76793	1.12708e-06	7.51479e-05	SALL1	PREDICTED: sal-like protein 1 [Lates calcarifer]
MSTRG.20250	3.05	9.11667	1.5797	1.12792e-06	7.51479e-05	--	XP_028430393.1 sialate O-acetylesterase [Perca flavescens]
Dxb_GLEAN_10009159	0.783333	1.84333	1.23462	1.48376e-06	9.60389e-05	sult6b1	Sulfotransferase 6B1 [Channa argus]
Dxb_GLEAN_10001827	2.07333	0.36	-2.52588	1.99199e-06	0.000125442	PMEL	melanocyte protein PMEL-like [Sparus aurata]
Dxb_GLEAN_10010261	1.81	4.97	1.45726	1.99481e-06	0.000125442	Cp1	cathepsin L1-like [Echeneis naucrates]
Dxb_GLEAN_10017823	1.29667	0.223333	-2.53754	1.99808e-06	0.000125442	SLC2A11	solute carrier family 2, facilitated glucose transporter member 11-like [Anarrhichthys ocellatus]
Dxb_GLEAN_10010094	3.54667	1.38667	-1.35484	2.12427e-06	0.000131899	AKAP12	A-kinase anchor protein 12-like [Sander lucioperca]
Dxb_GLEAN_10021072	4.30667	1.53667	-1.48677	2.87635e-06	0.000173928	PCSK9	proprotein convertase subtilisin/kexin type 9 [Larimichthys crocea]
MSTRG.10726	4.88667	2.33	-1.06852	3.16394e-06	0.000187374	SLC9A2	XP_018516665.1 PREDICTED: sodium/hydrogen exchanger 2-like [Lates calcarifer]
MSTRG.25092	21.03	10.0133	-1.07053	3.37136e-06	0.000198634	--	TDG99168.1 hypothetical protein EPR50_G00208690 [Perca flavescens]
MSTRG.21774	90.5967	31.9633	-1.50304	3.45231e-06	0.00020185	--	XP_023265245.1 uncharacterized protein LOC111657342 [Seriola lalandi dorsalis]
MSTRG.30054	72.8233	25.6333	-1.50638	3.83783e-06	0.000221017	--	TRY94370.1 hypothetical protein DNTS_006263 [Danionella translucida]
Dxb_GLEAN_10018904	2.17667	1.05	-1.05173	3.88365e-06	0.00022254	arhgap32	rho GTPase-activating protein 32-like [Sander lucioperca]
Dxb_GLEAN_10004504	4.57	1.54333	-1.56614	4.34846e-06	0.000243112	zic1	zinc finger protein ZIC 1 isoform X2 [Larimichthys crocea]
MSTRG.5363	3.1	0.813333	-1.93035	5.00838e-06	0.000275317	--	-
Dxb_GLEAN_10019561	3.4	13.29	1.96673	5.23668e-06	0.00028718	FABP2	Fatty acid-binding protein [Channa argus]
Dxb_GLEAN_10013943	0.0566667	0.193333	1.77052	6.53108e-06	0.000348193	LRP2	low-density lipoprotein receptor-related protein 2 isoform X1 [Perca flavescens]
Dxb_GLEAN_10001593	9.13	4.37667	-1.06078	6.60595e-06	0.000351369	--	T-lymphocyte activation antigen CD80-like [Perca flavescens]
MSTRG.5290	1.86333	0.163333	-3.51199	6.73738e-06	0.000355583	--	XP_018538438.1 PREDICTED: uncharacterized protein LOC108887474 isoform X5 [Lates calcarifer]
Dxb_GLEAN_10009922	9.12667	4.26333	-1.09811	7.11696e-06	0.000371917	MIMI_R795	Ubiquitin-conjugating enzyme E2 E2 [Channa argus]
Dxb_GLEAN_10008662	1.19667	2.80333	1.22812	7.195e-06	0.000374042	Aloxe3	hydroperoxide isomerase ALOXE3 [Larimichthys crocea]
Dxb_GLEAN_10007327	1.2	3.06333	1.35207	7.23089e-06	0.00037506	Pdk2	pyruvate dehydrogenase (acetyl-transferring) kinase isozyme 2, mitochondrial-like [Perca flavescens]
Dxb_GLEAN_10001205	0.001	0.86	9.74819	7.46157e-06	0.000384422	--	pol-like protein [Ciona intestinalis]
Dxb_GLEAN_10022320	57.3067	23.1567	-1.30728	8.09827e-06	0.000411686	--	mucin-5AC-like [Perca flavescens]
Dxb_GLEAN_10015796	2.05	0.843333	-1.28145	8.42364e-06	0.00042634	TLR7	Toll-like receptor 9A [Epinephelus lanceolatus]
MSTRG.23042	6.38667	14.9967	1.23151	8.52939e-06	0.000430744	--	AEA39656.1 C-C chemokine 1 [Epinephelus coioides]
MSTRG.28015	3.76667	0.183333	-4.36075	8.71821e-06	0.000438262	Ifi44	XP_027140583.1 interferon-induced protein 44 [Larimichthys crocea]
Dxb_GLEAN_10001200	0.00666667	0.423333	5.98868	9.01898e-06	0.000450518	POL	Retrovirus-related Pol polyprotein from transposon 412 [Labeo rohita]
Dxb_GLEAN_10016638	7.49333	3.4	-1.14007	9.95875e-06	0.000488234	Mag	sialic acid-binding Ig-like lectin 14 [Anarrhichthys ocellatus]
Dxb_GLEAN_10018495	6.97	2.89667	-1.26676	1.07332e-05	0.000520312	CD3D	T-cell surface glycoprotein CD3 gamma chain precursor [Anoplopoma fimbria]
Dxb_GLEAN_10018588	0.223333	0.78	1.80428	1.082e-05	0.000523415	Vmn2r1	vomeronasal type-2 receptor 1-like [Etheostoma spectabile]
Dxb_GLEAN_10021733	0.293333	6.88	4.5518	1.13013e-05	0.00054555	Sla2	src-like-adapter 2 isoform X2 [Etheostoma spectabile]
Dxb_GLEAN_10004830	0.126667	1.09	3.10522	1.16398e-05	0.00056071	RTase	Carnitine O-palmitoyltransferase 2, mitochondrial [Takifugu flavidus]
Dxb_GLEAN_10017861	9.25333	4.43	-1.06267	1.18044e-05	0.000567449	CMKLR1	chemokine-like receptor 1 [Amphiprion ocellaris]
Dxb_GLEAN_10008715	0.2	1.17	2.54844	1.20718e-05	0.000576686	SIM1	single-minded homolog 1-like [Sparus aurata]
Dxb_GLEAN_10015515	24.4267	10.5233	-1.21487	1.21206e-05	0.000577814	BPI	lipopolysaccharide-binding protein-like [Cottoperca gobio]
Dxb_GLEAN_10005539	6.11667	2.87333	-1.09002	1.21635e-05	0.00057866	GRK5	G protein-coupled receptor kinase 5-like isoform X2 [Sparus aurata]
Dxb_GLEAN_10002916	0.47	8.7	4.21028	1.22063e-05	0.000579496	--	proteoglycan 4-like [Etheostoma spectabile]
Dxb_GLEAN_10018675	63.81	28.83	-1.14621	1.23498e-05	0.000582907	NWD2	NACHT and WD repeat domain-containing protein 2-like [Cottoperca gobio]
Dxb_GLEAN_10010386	5.06	10.48	1.05043	1.2562e-05	0.000590286	Asb2	ankyrin repeat and SOCS box protein 2-like isoform X3 [Sander lucioperca]
MSTRG.9259	7.56	19.4767	1.36529	1.37994e-05	0.00064317	--	ADQ00191.1 CC chemokine [Miichthys miiuy]
Dxb_GLEAN_10007588	2.77333	0.363333	-2.93226	1.62043e-05	0.000736787	mreg	melanoregulin-like [Larimichthys crocea]
Dxb_GLEAN_10016251	0.04	0.536667	3.74595	1.62493e-05	0.000736787	pdzrn3b	PREDICTED: serine/arginine repetitive matrix protein 1-like [Austrofundulus limnaeus]
Dxb_GLEAN_10013547	0.001	0.226667	7.82443	1.65818e-05	0.000748561	ANPEP	aminopeptidase N-like [Anarrhichthys ocellatus]
Dxb_GLEAN_10021240	0.46	1.52333	1.72753	1.6811e-05	0.000757419	ttc39c	PREDICTED: tetratricopeptide repeat protein 39C [Lates calcarifer]
Dxb_GLEAN_10014405	1.01333	2.22333	1.13362	1.74381e-05	0.000781077	Enox1	PREDICTED: ecto-NOX disulfide-thiol exchanger 1 isoform X4 [Lepisosteus oculatus]
Dxb_GLEAN_10011548	0.04	0.24	2.58496	1.76554e-05	0.000789271	--	golgin subfamily A member 4-like isoform X2 [Cottoperca gobio]
Dxb_GLEAN_10022218	2.2	4.83333	1.13551	1.82437e-05	0.000808645	TCP11L2	T-complex protein 11-like protein 1 [Seriola dumerili]
Dxb_GLEAN_10018927	1.06333	2.60333	1.29177	1.92099e-05	0.000843989	SLC13A5	solute carrier family 13 member 5-like [Cottoperca gobio]
MSTRG.23525	22.45	7.71667	-1.54067	1.94771e-05	0.000852465	MYH1B	XP_025762408.1 myosin heavy chain, fast skeletal muscle [Oreochromis niloticus]
Dxb_GLEAN_10010317	10.0467	4.73	-1.0868	1.96707e-05	0.000859303	Cmpk2	UMP-CMP kinase 2, mitochondrial [Sander lucioperca]
MSTRG.28794	5.39333	1.67667	-1.68558	2.11503e-05	0.000913516	XCR1	ASA39640.1 XCR1 [Epinephelus coioides]
Dxb_GLEAN_10014897	0.296667	0.766667	1.36976	2.13045e-05	0.000918451	--	BTB/POZ domain-containing protein 18 isoform X3 [Sander lucioperca]
Dxb_GLEAN_10006471	6.80667	2.58	-1.39958	2.14723e-05	0.000922951	STYK1	tyrosine-protein kinase STYK1-like [Acanthochromis polyacanthus]
MSTRG.19918	7.33	2.52	-1.54039	2.14892e-05	0.000922951	URGCP	XP_031144382.1 interferon-induced very large GTPase 1-like isoform X1 [Sander lucioperca]
Dxb_GLEAN_10017813	0.04	0.65	4.02237	2.46801e-05	0.00103297	TBX5	T-box transcription factor TBX5-like [Anarrhichthys ocellatus]
MSTRG.30407	34.7333	15.3033	-1.18247	2.64692e-05	0.00110383	PZP	XP_023256301.1 alpha-2-macroglobulin-like [Seriola lalandi dorsalis]
Dxb_GLEAN_10007490	11.5533	1.58667	-2.86424	2.76951e-05	0.00114642	Mybpc2	myosin-binding protein C, fast-type isoform X1 [Anabas testudineus]
Dxb_GLEAN_10006169	3.19	1.39333	-1.19502	2.77401e-05	0.00114642	SLC16A6	monocarboxylate transporter 7-like [Sander lucioperca]
Dxb_GLEAN_10007950	10.4867	4.81333	-1.12345	2.83471e-05	0.00116522	--	uncharacterized LOC103392932 precursor [Cynoglossus semilaevis]
Dxb_GLEAN_10014195	0.0533333	0.83	3.96	2.88729e-05	0.0011826	ZIC2	PREDICTED: zinc finger protein ZIC 2 [Lates calcarifer]
Dxb_GLEAN_10003424	13.9733	4.05667	-1.78431	2.91933e-05	0.00118937	tyrp1	5,6-dihydroxyindole-2-carboxylic acid oxidase [Seriola dumerili]
MSTRG.20897	1.7	4.26	1.32532	2.93023e-05	0.0011917	AOX1	XP_018516824.1 PREDICTED: aldehyde oxidase [Lates calcarifer]
Dxb_GLEAN_10016952	3.33667	1.45333	-1.19904	2.99416e-05	0.00121554	CLCN1	chloride channel protein 1 [Parambassis ranga]
Dxb_GLEAN_10021426	4.33667	0.473333	-3.19566	3.0527e-05	0.00123278	snrpe	small nuclear ribonucleoprotein E isoform X1 [Paramormyrops kingsleyae]
Dxb_GLEAN_10007762	2.76	0.46	-2.58496	3.23616e-05	0.00130457	MYH1	PREDICTED: myosin heavy chain, fast skeletal muscle-like [Stegastes partitus]
Dxb_GLEAN_10003962	2.89333	0.87	-1.73365	3.27552e-05	0.00131582	PARP11	PREDICTED: poly [ADP-ribose] polymerase 11-like [Notothenia coriiceps]
Dxb_GLEAN_10013214	0.97	0.2	-2.27798	3.30612e-05	0.00132118	SLC23A1	solute carrier family 23 member 1-like [Seriola lalandi dorsalis]
MSTRG.7616	7.33667	3.23333	-1.1821	3.36344e-05	0.00133943	--	XP_018515879.1 PREDICTED: uncharacterized protein LOC108872587 isoform X4 [Lates calcarifer]
Dxb_GLEAN_10012978	0.213333	0.706667	1.72792	3.45492e-05	0.00136932	Trim24	E3 ubiquitin-protein ligase TRIM33-like isoform X2 [Sander lucioperca]
Dxb_GLEAN_10011075	1.63333	0.07	-4.54432	3.63159e-05	0.001424	SLC6A12	sodium- and chloride-dependent GABA transporter 2-like [Seriola lalandi dorsalis]
Dxb_GLEAN_10002038	2.89333	7.87667	1.44485	3.73159e-05	0.00145084	zgc:112234	histone H2B 1/2-like [Perca flavescens]
Dxb_GLEAN_10011350	4.06	1.89	-1.10309	4.56284e-05	0.00173147	amer2	APC membrane recruitment protein 2-like [Takifugu rubripes]
Dxb_GLEAN_10007058	18.6567	6.84	-1.44762	4.65917e-05	0.00175857	--	Receptor-transporting protein 3 [Anoplopoma fimbria]
Dxb_GLEAN_10009825	0.526667	0.12	-2.13386	4.70174e-05	0.00177109	SLC2A9	PREDICTED: solute carrier family 2, facilitated glucose transporter member 9-like [Lates calcarifer]
Dxb_GLEAN_10019798	3.48333	1.07	-1.70286	4.84543e-05	0.00181038	--	pyrin-like [Perca flavescens]
MSTRG.18181	2.67	1.04667	-1.35104	5.14226e-05	0.00189357	SCD	XP_022598290.1 acyl-CoA desaturase-like [Seriola dumerili]
Dxb_GLEAN_10009262	7.21667	3.18667	-1.17928	5.31445e-05	0.00195072	SULT3A1	amine sulfotransferase-like [Cottoperca gobio]
Dxb_GLEAN_10000990	49.6733	20.1667	-1.3005	5.32322e-05	0.00195083	H3C1	H3F3B isoform 11 [Pan troglodytes]
Dxb_GLEAN_10018403	79.2367	39.39	-1.00834	5.41674e-05	0.00197565	A2m	alpha-2-macroglobulin-like [Sander lucioperca]
Dxb_GLEAN_10002879	0.61	3.67667	2.59152	5.68607e-05	0.00204788	Siae	sialate O-acetylesterase [Anabas testudineus]
Dxb_GLEAN_10012856	3.33333	1.06333	-1.64837	5.97878e-05	0.00213596	Smim29	LOW QUALITY PROTEIN: protein Bouncer-like [Sander lucioperca]
Dxb_GLEAN_10019896	5.83333	1.67	-1.80447	6.00409e-05	0.00213894	GIMAP7	GTPase IMAP family member 4-like isoform X2 [Etheostoma spectabile]
Dxb_GLEAN_10020432	0.001	0.626667	9.29155	6.37991e-05	0.00225535	C1orf226	carboxyl-terminal PDZ ligand of neuronal nitric oxide synthase protein-like [Myripristis murdjan]
MSTRG.17700	1.09667	0.16	-2.77698	6.559e-05	0.00230891	Suds3	XP_019741305.1 PREDICTED: sin3 histone deacetylase corepressor complex component SDS3 isoform X2 [Hippocampus comes]
MSTRG.18462	5.98667	2.48333	-1.26948	6.78908e-05	0.00237442	--	-
MSTRG.25498	625.6	179.9	-1.79805	7.7314e-05	0.0026397	mb	XP_014847462.1 PREDICTED: myoglobin-like isoform X1 [Poecilia mexicana]
Dxb_GLEAN_10009147	1.18	3.55333	1.59039	7.88199e-05	0.00267129	ANKRD1	ankyrin repeat domain-containing protein 1 [Labrus bergylta]
Dxb_GLEAN_10022390	3.81667	1.72667	-1.14432	7.89366e-05	0.00267129	Trim39	nuclear factor 7, ovary-like [Seriola dumerili]
MSTRG.20241	8.40667	3.92333	-1.09945	8.10991e-05	0.00273641	--	KAF1382661.1 hypothetical protein PFLUV_G00146090 [Perca fluviatilis]
Dxb_GLEAN_10016177	6.13667	20.4367	1.73563	8.17555e-05	0.00275048	Camk1g	calcium/calmodulin-dependent protein kinase type 1D-like [Seriola dumerili]
Dxb_GLEAN_10019889	0.001	0.516667	9.01309	8.67257e-05	0.00288809	metrnl	meteorin-like protein [Archocentrus centrarchus]
Dxb_GLEAN_10014829	0.02	0.34	4.08746	8.7126e-05	0.00289722	--	PREDICTED: osmotic avoidance abnormal protein 3-like isoform X1 [Notothenia coriiceps]
Dxb_GLEAN_10001300	8.72	3.64333	-1.25907	9.54372e-05	0.00313279	--	CD48 antigen isoform X2 [Larimichthys crocea]
Dxb_GLEAN_10017883	0.38	0.773333	1.02509	0.00010079	0.00328038	Ank1	ankyrin-1 isoform X5 [Amphiprion ocellaris]
Dxb_GLEAN_10008187	0.573333	1.25667	1.13216	0.000103017	0.00331994	Tgfbr3	transforming growth factor beta receptor type 3-like isoform X1 [Cottoperca gobio]
Dxb_GLEAN_10006401	0.196667	0.953333	2.27723	0.000106996	0.00342896	RTase	Carnitine O-palmitoyltransferase 2, mitochondrial [Takifugu flavidus]
Dxb_GLEAN_10004503	2.65667	1.09333	-1.28088	0.000108724	0.00346982	zic4	zinc finger protein ZIC 4-like isoform X2 [Acanthochromis polyacanthus]
Dxb_GLEAN_10001168	5.34667	2.22	-1.26808	0.000111872	0.00354463	Gimap9	GTPase IMAP family member 9-like isoform X2 [Sander lucioperca]
Dxb_GLEAN_10012212	0.1	0.456667	2.19114	0.000112459	0.00354468	Clstn2	calsyntenin-2 [Larimichthys crocea]
Dxb_GLEAN_10020238	1.23667	5.92667	2.26076	0.000115177	0.00361582	Cxcl2	interleukin-8 [Epinephelus coioides]
Dxb_GLEAN_10014954	11.7	5.28333	-1.14699	0.000130437	0.00399776	SLC5A7	PREDICTED: high-affinity choline transporter 1-like isoform X1 [Lates calcarifer]
Dxb_GLEAN_10012550	0.463333	7.78667	4.07088	0.000133224	0.00403855	--	proteoglycan 4-like [Sander lucioperca]
Dxb_GLEAN_10017870	1.35667	2.93667	1.11411	0.000133563	0.00404349	EMID1	EMI domain-containing protein 1 isoform X3 [Larimichthys crocea]
Dxb_GLEAN_10008609	0.001	0.46	8.84549	0.000134716	0.00406236	CTSB	Squalene synthase [Larimichthys crocea]
MSTRG.16657	12.0133	5.81667	-1.04637	0.000134928	0.00406339	--	KAF1392288.1 hypothetical protein PFLUV_G00051240 [Perca fluviatilis]
Dxb_GLEAN_10019484	0.96	2.67667	1.47933	0.000138378	0.00415097	Sp6	Transcription factor [Collichthys lucidus]
Dxb_GLEAN_10002342	1.25667	3.94333	1.64981	0.000140834	0.00419183	--	perforin-1-like protein [Labeo rohita]
Dxb_GLEAN_10016860	0.001	0.666667	9.38082	0.000143536	0.00422843	Prss2	trypsinogen [Seriola quinqueradiata]
Dxb_GLEAN_10000671	7.37	15.4633	1.06911	0.000145929	0.00428244	H3-I	Histone H3c [Culex quinquefasciatus]
MSTRG.22790	0.956667	2.42333	1.3409	0.000150822	0.00440354	--	XP_018516883.1 PREDICTED: uncharacterized protein LOC108873231 isoform X1 [Lates calcarifer]
MSTRG.25642	0.303333	1.17	1.94753	0.000155321	0.00451196	--	XP_031147453.1 insulin receptor substrate 1-like isoform X2 [Sander lucioperca]
Dxb_GLEAN_10006885	1.20667	2.87667	1.25337	0.000155944	0.00451864	sp8b	transcription factor Sp8-like [Perca flavescens]
Dxb_GLEAN_10009904	1.08667	2.33667	1.10454	0.000158515	0.0045701	PRKD1	serine/threonine-protein kinase D1-like [Acanthochromis polyacanthus]
Dxb_GLEAN_10002864	4.71	1.86	-1.34042	0.000163954	0.00469349	Selenoi	ethanolaminephosphotransferase 1 [Larimichthys crocea]
Dxb_GLEAN_10001282	14.28	5.17	-1.46576	0.000167377	0.00477762	--	MHC class Ia antigen [Dicentrarchus labrax]
Dxb_GLEAN_10014432	0.75	1.56667	1.06274	0.000177853	0.00501437	pol	R2DM Retrovirus-related Pol polyprotein from type II retrotransposable element [Takifugu flavidus]
Dxb_GLEAN_10004206	2.42	0.986667	-1.29437	0.000178134	0.00501614	nxpe3	NXPE family member 3-like [Perca flavescens]
Dxb_GLEAN_10017425	3.22	1.54	-1.06413	0.000178385	0.00501706	marveld2	MARVEL domain-containing protein 2-like [Etheostoma spectabile]
Dxb_GLEAN_10009046	4.40667	1.27	-1.79486	0.000179442	0.0050406	pm20d2	peptidase M20 domain-containing protein 2 [Larimichthys crocea]
Dxb_GLEAN_10000176	0.001	0.69	9.43045	0.000181549	0.00508735	--	C2 calcium-dependent domain-containing protein 4C-like [Seriola dumerili]
MSTRG.22137	15.0267	6.79	-1.14604	0.000184313	0.00514225	prpf31	XP_022612232.1 U4/U6 small nuclear ribonucleoprotein Prp31 [Seriola dumerili]
Dxb_GLEAN_10004818	0.001	0.0466667	5.54432	0.000184955	0.00514225	CUBN	PREDICTED: cubilin [Sinocyclocheilus grahami]
Dxb_GLEAN_10017150	0.573333	1.21	1.07756	0.000188695	0.0052302	Gabbr1	PREDICTED: gamma-aminobutyric acid type B receptor subunit 1 isoform X2 [Pundamilia nyererei]
Dxb_GLEAN_10003645	11.8067	4.96667	-1.24925	0.000191525	0.00529018	--	PREDICTED: polyubiquitin-like [Neolamprologus brichardi]
Dxb_GLEAN_10004707	1.41	6.95333	2.30201	0.000191728	0.00529018	Myh6	myosin-6-like [Amphiprion ocellaris]
MSTRG.20034	0.943333	1.91	1.01773	0.000193016	0.00531151	--	XP_031594165.1 liprin-beta-2-like isoform X2 [Oreochromis aureus]
Dxb_GLEAN_10016694	0.0566667	1.11	4.29192	0.000207242	0.0056556	hoxa13b	homeobox protein Hox-A13b [Cottoperca gobio]
Dxb_GLEAN_10009255	1.14	2.3	1.0126	0.000223615	0.00602371	Sdccag8	serologically defined colon cancer antigen 8 isoform X2 [Cottoperca gobio]
Dxb_GLEAN_10013313	0.00666667	0.18	4.75489	0.000224253	0.00603382	rag1	V(D)J recombination-activating protein 1 [Sander lucioperca]
MSTRG.22683	0.93	3.14	1.75546	0.000228152	0.00611012	--	KAA8593144.1 hypothetical protein FQN60_018599, partial [Etheostoma spectabile]
MSTRG.10800	2.44	1.06667	-1.19377	0.000234431	0.00623466	--	XP_031707543.1 OX-2 membrane glycoprotein-like [Anarrhichthys ocellatus]
Dxb_GLEAN_10021167	1.5	0.62	-1.27462	0.000235848	0.00626511	Oca2	PREDICTED: P protein [Paralichthys olivaceus]
Dxb_GLEAN_10012708	6.30667	2.73333	-1.20622	0.000238139	0.00629685	--	pro-neuregulin-4, membrane-bound isoform [Cottoperca gobio]
Dxb_GLEAN_10013941	5.81667	2.78333	-1.06338	0.000244265	0.006444	Rdh16	retinol dehydrogenase 7-like [Perca flavescens]
Dxb_GLEAN_10009722	2.93333	1.40667	-1.06026	0.000248069	0.00653685	Nanp	N-acylneuraminate-9-phosphatase [Anarrhichthys ocellatus]
Dxb_GLEAN_10015812	115.083	8.83333	-3.70358	0.000250643	0.00658427	samhd1	deoxynucleoside triphosphate triphosphohydrolase SAMHD1-like [Sparus aurata]
Dxb_GLEAN_10005746	0.493333	1.16333	1.23763	0.000258431	0.00675566	Sema4g	semaphorin-4G [Cottoperca gobio]
Dxb_GLEAN_10000877	11.7	2.63667	-2.14972	0.000259264	0.00676973	H4-I	Histone H4 [Larimichthys crocea]
Dxb_GLEAN_10023261	0.323333	0.82	1.3426	0.000262378	0.00682778	pol	Retrovirus-related Pol polyprotein from transposon 17.6 [Collichthys lucidus]
MSTRG.10289	3.67	1.62667	-1.17386	0.000266231	0.00691237	--	KAA8582505.1 hypothetical protein FQN60_006176 [Etheostoma spectabile]
MSTRG.30298	41.09	19.5333	-1.07285	0.000275923	0.00712377	--	AER42650.1 vig1 (viperin), partial [Epinephelus coioides]
Dxb_GLEAN_10012654	1.65667	0.383333	-2.11161	0.000280008	0.00720496	OTOGL	phosphatidylinositol phosphatase PTPRQ [Seriola dumerili]
Dxb_GLEAN_10011230	0.113333	0.23	1.02106	0.000282329	0.00724844	NBEA	neurobeachin-like isoform X17 [Sparus aurata]
Dxb_GLEAN_10002875	0.636667	0.11	-2.53303	0.000303586	0.00770806	Btn1a1	Neoverrucotoxin subunit beta [Collichthys lucidus]
Dxb_GLEAN_10012778	1.33333	0.363333	-1.87567	0.00030926	0.00783481	TRIM27	zinc-binding protein A33-like [Sander lucioperca]
Dxb_GLEAN_10010149	1.53	3.96667	1.3744	0.000311011	0.00786183	NCEH1	neutral cholesterol ester hydrolase 1-like [Sander lucioperca]
Dxb_GLEAN_10007632	0.0666667	0.276667	2.05311	0.000315492	0.00794018	CNTNAP1	contactin-associated protein 1 [Amphiprion ocellaris]
Dxb_GLEAN_10005936	0.05	1.55667	4.96039	0.000316264	0.00795023	KLHL11	kelch-like protein 11 [Perca flavescens]
Dxb_GLEAN_10012393	4.03667	1.40333	-1.52431	0.000319067	0.00799513	GRINA	protein lifeguard 1-like [Anarrhichthys ocellatus]
Dxb_GLEAN_10015406	3.53667	1.43333	-1.30302	0.000319747	0.00800344	TRIM50	LOW QUALITY PROTEIN: E3 ubiquitin/ISG15 ligase TRIM25-like [Cottoperca gobio]
Dxb_GLEAN_10007825	119.31	31.6367	-1.91505	0.000323222	0.00806469	lgals3bpb	galectin-3-binding protein [Sander lucioperca]
Dxb_GLEAN_10011979	5.63667	2.43333	-1.21191	0.000327896	0.00815411	Dtna	dystrobrevin alpha isoform X2 [Seriola lalandi dorsalis]
MSTRG.17158	0.47	1.41	1.58496	0.000342818	0.008452	NFATC1	XP_005943596.1 PREDICTED: nuclear factor of activated T-cells, cytoplasmic 1 isoform X1 [Haplochromis burtoni]
Dxb_GLEAN_10001331	2.59	0.916667	-1.49848	0.000363628	0.00890396	TRIM27	PREDICTED: E3 ubiquitin/ISG15 ligase TRIM25-like [Lates calcarifer]
MSTRG.16077	0.99	0.11	-3.16993	0.000402901	0.00963357	--	-
Dxb_GLEAN_10004401	0.3	1.35667	2.17703	0.000408542	0.00974028	--	TNFAIP3-interacting protein 1-like [Larimichthys crocea]
Dxb_GLEAN_10016241	128.933	63.9033	-1.01266	0.000423537	0.0100434	--	C-type lectin domain family 10 member A-like [Sparus aurata]
MSTRG.10719	0.666667	1.81	1.44095	0.000426593	0.010095	BDH1	XP_031148275.1 D-beta-hydroxybutyrate dehydrogenase, mitochondrial-like [Sander lucioperca]
Dxb_GLEAN_10007025	7.59667	17.5433	1.20748	0.000427835	0.010114	FABP3	PREDICTED: fatty acid-binding protein, heart-like [Paralichthys olivaceus]
Dxb_GLEAN_10008323	0.35	0.766667	1.13124	0.000441142	0.0103224	cep170b	centrosomal protein of 170 kDa protein B-like isoform X3 [Acanthochromis polyacanthus]
Dxb_GLEAN_10011199	3.67667	1.23333	-1.57584	0.000457973	0.0106296	Vwa7	PREDICTED: von Willebrand factor A domain-containing protein 7-like [Lates calcarifer]
Dxb_GLEAN_10003094	2.89667	0.743333	-1.96231	0.00046023	0.0106712	lyrm2	LYR motif-containing protein 2 [Parambassis ranga]
Dxb_GLEAN_10012808	1.83333	0.736667	-1.31539	0.00047719	0.0110156	ANO9	anoctamin-9 [Sparus aurata]
Dxb_GLEAN_10018719	3.15333	1.41333	-1.15778	0.000477959	0.0110156	AIFM3	apoptosis-inducing factor 3-like isoform X1 [Cottoperca gobio]
Dxb_GLEAN_10002614	3.8	7.84667	1.04608	0.00048015	0.011055	--	mucin-2-like isoform X2 [Boleophthalmus pectinirostris]
MSTRG.16969	2.38667	0.673333	-1.8256	0.000506414	0.0115317	VTN	KAF1393985.1 hypothetical protein PFLUV_G00021800 [Perca fluviatilis]
Dxb_GLEAN_10002861	0.313333	1.2	1.93726	0.000506876	0.0115317	PNMA2	zinc finger CCHC domain-containing 12-like protein [Labeo rohita]
MSTRG.17904	1.88667	0.703333	-1.42356	0.000521996	0.0117939	--	XP_031151382.1 major histocompatibility complex class I-related gene protein-like [Sander lucioperca]
Dxb_GLEAN_10003369	0.08	0.833333	3.38082	0.000524562	0.011817	--	cilia- and flagella-associated protein 251-like [Sander lucioperca]
Dxb_GLEAN_10011076	2.40667	0.813333	-1.56512	0.000536653	0.012054	Slc6a13	sodium- and chloride-dependent GABA transporter 2-like [Cottoperca gobio]
Dxb_GLEAN_10022638	0.001	0.156667	7.29155	0.000560152	0.012446	PPEF2	serine/threonine-protein phosphatase with EF-hands 1 [Larimichthys crocea]
Dxb_GLEAN_10017294	0.0266667	0.146667	2.45943	0.000607146	0.0132993	TG	thyroglobulin-like [Sparus aurata]
Dxb_GLEAN_10013719	0.2	0.466667	1.22239	0.00061015	0.013327	DNAH7	PREDICTED: LOW QUALITY PROTEIN: dynein heavy chain 7, axonemal-like [Lates calcarifer]
Dxb_GLEAN_10013307	0.563333	1.24	1.13828	0.000621587	0.0135254	Slc1a2	excitatory amino acid transporter 2 isoform X1 [Sphaeramia orbicularis]
Dxb_GLEAN_10022278	2.18	1	-1.12433	0.000627668	0.0136319	Fer1l4	fer-1-like protein 4 [Sander lucioperca]
Dxb_GLEAN_10012322	4.75667	2.23333	-1.09075	0.000629526	0.0136593	b3gnt5a	lactosylceramide 1,3-N-acetyl-beta-D-glucosaminyltransferase [Sander lucioperca]
Dxb_GLEAN_10003713	0.0233333	0.206667	3.14684	0.000641783	0.0138991	CDKL2	cyclin-dependent kinase-like 5 [Sander lucioperca]
Dxb_GLEAN_10006446	1.37667	0.296667	-2.21426	0.000660679	0.0142278	Mr1	MHC class I antigen, partial [Dicentrarchus labrax]
Dxb_GLEAN_10000190	0.001	0.713333	9.47843	0.000666407	0.0143109	IGKV6D-41	Ig kappa chain V region 3547 [Collichthys lucidus]
Dxb_GLEAN_10022617	1.03667	0.23	-2.17225	0.000675209	0.0144325	scg3	secretogranin-3 isoform X1 [Larimichthys crocea]
Dxb_GLEAN_10002425	0.883333	1.78	1.01085	0.000679935	0.01452	USP43	PREDICTED: ubiquitin carboxyl-terminal hydrolase 43-like isoform X1 [Lates calcarifer]
Dxb_GLEAN_10012589	0.776667	2.25667	1.53883	0.00070291	0.0149121	cahz	PREDICTED: carbonic anhydrase-like [Lates calcarifer]
Dxb_GLEAN_10002350	7.08	3.5	-1.01639	0.000704134	0.0149121	--	TYRO protein tyrosine kinase-binding protein [Larimichthys crocea]
Dxb_GLEAN_10015320	1.06333	2.19667	1.04672	0.000722412	0.0151893	STK35	serine/threonine-protein kinase 35-like [Amphiprion ocellaris]
MSTRG.28420	4.68	1.91667	-1.28791	0.000725711	0.0152426	--	XP_028462066.1 V-set domain containing T-cell activation inhibitor 1-like isoform X2 [Perca flavescens]
Dxb_GLEAN_10004161	0.09	0.343333	1.93161	0.000747147	0.015593	ANO1	anoctamin-1-like isoform X1 [Anarrhichthys ocellatus]
Dxb_GLEAN_10015182	0.001	0.41	8.67948	0.000760643	0.0158029	tomt	catechol O-methyltransferase-like [Sander lucioperca]
Dxb_GLEAN_10001227	0.623333	0.02	-4.96193	0.000765626	0.0158634	KMT5C	PREDICTED: histone-lysine N-methyltransferase KMT5C-like isoform X4 [Lates calcarifer]
Dxb_GLEAN_10012750	3.1	1.54667	-1.00311	0.000767226	0.0158694	HEXA	beta-hexosaminidase subunit alpha-like isoform X1 [Sander lucioperca]
Dxb_GLEAN_10005335	0.0233333	0.41	4.13516	0.000777001	0.0159592	pou5f1	POU domain, class 5, transcription factor 1-like [Cottoperca gobio]
Dxb_GLEAN_10001127	0.636667	1.69	1.40841	0.000777744	0.0159592	CD163	CD5 antigen-like isoform X2 [Cottoperca gobio]
Dxb_GLEAN_10008635	4.45333	2.12333	-1.06855	0.000780775	0.0159592	FAM110C	protein FAM110C [Sander lucioperca]
MSTRG.10602	3.61	0.916667	-1.97753	0.000841957	0.0168523	--	XP_018560303.1 PREDICTED: mucin-2-like [Lates calcarifer]
Dxb_GLEAN_10014030	1.12	0.416667	-1.42653	0.00089172	0.017679	Tlr8	TLR8 [Epinephelus coioides]
Dxb_GLEAN_10001241	5.90667	2.95	-1.00163	0.000902464	0.0178151	cyp2k4	cytochrome P450 2K1-like [Parambassis ranga]
Dxb_GLEAN_10003433	3.12333	1.40333	-1.15423	0.000925797	0.0182132	jockey\pol	CR1-3 [Lycodichthys dearborni]
Dxb_GLEAN_10008327	0.28	0.586667	1.06711	0.000938932	0.0184211	Kif26a	PREDICTED: kinesin-like protein KIF26A isoform X2 [Lates calcarifer]
Dxb_GLEAN_10018388	1.72333	0.696667	-1.30666	0.000972549	0.0188744	--	L-amino-acid oxidase-like isoform X2 [Sander lucioperca]
Dxb_GLEAN_10003575	7.64	3.23333	-1.24055	0.000978991	0.0189673	--	PREDICTED: GTPase IMAP family member 7-like [Notothenia coriiceps]
Dxb_GLEAN_10011512	6.90667	3.4	-1.02245	0.00100777	0.0193617	--	bromodomain-containing protein DDB_G0270170-like [Seriola lalandi dorsalis]
Dxb_GLEAN_10019067	0.0133333	0.39	4.87036	0.001037	0.0196764	B3GNT2	UDP-GlcNAc:betaGal beta-1,3-N-acetylglucosaminyltransferase 8 [Sparus aurata]
Dxb_GLEAN_10018714	1.62	0.506667	-1.67688	0.00105507	0.0199862	VTN	vitronectin [Cottoperca gobio]
Dxb_GLEAN_10005021	3.49667	7.06	1.01369	0.0010822	0.0203054	PTGES	PREDICTED: prostaglandin E synthase [Stegastes partitus]
Dxb_GLEAN_10011186	2.22	0.913333	-1.28135	0.0011171	0.0207844	CLDN4	claudin-4-like [Seriola lalandi dorsalis]
Dxb_GLEAN_10016246	1.88667	0.69	-1.45117	0.0011247	0.0208751	--	PREDICTED: mucin-5AC-like [Lates calcarifer]
Dxb_GLEAN_10012229	3.53667	1.03	-1.77975	0.00120831	0.0220528	TIMM44	mitochondrial import inner membrane translocase subunit TIM44-like isoform X2 [Anarrhichthys ocellatus]
MSTRG.28089	1.48667	0.313333	-2.24631	0.00123933	0.022432	Trim39	XP_018545396.1 PREDICTED: nuclear factor 7, ovary-like [Lates calcarifer]
MSTRG.26975	7.55	3.29333	-1.19693	0.00124603	0.0224559	EIF2AK2	ACJ23858.1 double-stranded RNA-dependent protein kinase [Oplegnathus fasciatus]
Dxb_GLEAN_10000273	2.79	7.63333	1.45205	0.00125981	0.0226426	Nlrp9b	ribonuclease inhibitor-like [Seriola lalandi dorsalis]
Dxb_GLEAN_10004479	0.483333	1.26333	1.38614	0.00128506	0.0229791	shha	sonic hedgehog protein [Larimichthys crocea]
Dxb_GLEAN_10010167	0.953333	2.79333	1.55094	0.00128871	0.0230102	GADD45B	growth arrest and DNA damage-inducible protein GADD45 beta-like [Parambassis ranga]
Dxb_GLEAN_10020581	0.223333	0.646667	1.53382	0.0012951	0.0230399	Prg4	proteoglycan 4-like isoform X2 [Sander lucioperca]
Dxb_GLEAN_10014817	4.39333	9.68667	1.14068	0.00130696	0.0232081	ADAMTS3	PREDICTED: A disintegrin and metalloproteinase with thrombospondin motifs 2-like, partial [Notothenia coriiceps]
Dxb_GLEAN_10008856	0.0333333	0.383333	3.52356	0.00132692	0.02349	Tlr5	TLR5S [Epinephelus coioides]
Dxb_GLEAN_10014706	0.0466667	0.496667	3.41181	0.00134328	0.0236884	Dok3	docking protein 3-like isoform X1 [Sander lucioperca]
Dxb_GLEAN_10006400	0.333333	1.09	1.70929	0.00135288	0.0238394	RTase	Transposable element [Takifugu flavidus]
Dxb_GLEAN_10002665	1.38	4.65333	1.7536	0.00136839	0.0240021	MYLPF	myosin light chain 2 [Katsuwonus pelamis]
MSTRG.15783	3423.36	1364.68	-1.32685	0.00137404	0.0240828	--	AEM37658.1 nattectin, partial [Epinephelus bruneus]
Dxb_GLEAN_10010185	2.48	0.92	-1.43063	0.00142578	0.0247878	RABGAP1L	rab GTPase-activating protein 1-like [Perca flavescens]
Dxb_GLEAN_10013350	1.19667	0.513333	-1.22105	0.0014272	0.0247878	VNX1	low affinity vacuolar monovalent cation/H(+) antiporter-like [Perca flavescens]
Dxb_GLEAN_10004238	0.52	0.133333	-1.96347	0.00146165	0.0252388	TLR1	TLR1-2 [Epinephelus coioides]
MSTRG.15788	0.73	0.0233333	-4.96743	0.00146725	0.0253112	--	-
Dxb_GLEAN_10012428	0.04	0.233333	2.54432	0.00150751	0.0258504	CNTNAP5	LOW QUALITY PROTEIN: contactin-associated protein-like 4 [Cottoperca gobio]
Dxb_GLEAN_10005672	0.293333	1.18	2.00817	0.00151523	0.0259441	ELOVL6	elongation of very long chain fatty acids protein 6-like [Seriola dumerili]
Dxb_GLEAN_10000281	3.17333	1.07667	-1.55943	0.00152198	0.026021	TRIM11	tripartite motif-containing protein 16-like protein [Oreochromis niloticus]
Dxb_GLEAN_10002704	0.653333	1.58667	1.28011	0.0015271	0.0260274	mdm1	nuclear protein MDM1 [Sander lucioperca]
Dxb_GLEAN_10001779	4.89667	2.32	-1.07768	0.00153235	0.0260526	sox19b	transcription factor Sox-19b-like [Cottoperca gobio]
Dxb_GLEAN_10014600	0.0666667	0.813333	3.60881	0.00155364	0.0262496	--	proteinase-activated receptor 1-like [Boleophthalmus pectinirostris]
Dxb_GLEAN_10003436	1.81333	0.443333	-2.03218	0.00156051	0.0263076	dctn6	Dynactin subunit 6 [Collichthys lucidus]
Dxb_GLEAN_10004205	2.22	0.763333	-1.54017	0.00159781	0.0267015	nxpe3	NXPE family member 3-like [Perca flavescens]
MSTRG.26488	3.12	1.33333	-1.22651	0.00164718	0.0273627	FASN	XP_010790395.1 PREDICTED: fatty acid synthase-like [Notothenia coriiceps]
MSTRG.10040	34.5067	116.577	1.75633	0.00167799	0.027679	--	XP_031732757.1 fish-egg lectin-like [Anarrhichthys ocellatus]
Dxb_GLEAN_10017869	0.0766667	0.163333	1.09115	0.00169751	0.0278618	DNAH10	dynein heavy chain 10, axonemal [Perca flavescens]
MSTRG.17762	0.733333	1.5	1.03242	0.00170974	0.0279618	--	-
Dxb_GLEAN_10021849	0.78	0.06	-3.70044	0.0018596	0.029848	PGA	pepsin A-like [Perca flavescens]
Dxb_GLEAN_10005088	2.20667	0.566667	-1.9613	0.00186144	0.029848	--	gonadal soma-derived factor [Epinephelus akaara]
Dxb_GLEAN_10011686	4.05333	1.94333	-1.06058	0.00187222	0.0299441	Trim25	tripartite motif-containing protein 16-like [Sparus aurata]
Dxb_GLEAN_10022131	10.9933	41.5967	1.91984	0.00191795	0.0304777	Myh8	PREDICTED: myosin heavy chain, fast skeletal muscle-like [Lates calcarifer]
Dxb_GLEAN_10002645	2.67333	0.78	-1.77709	0.00194054	0.0307092	Btn2a2	stonustoxin subunit beta-like [Etheostoma spectabile]
Dxb_GLEAN_10016237	3.93667	1.36	-1.53337	0.0019423	0.0307159	RAB29	ras-related protein Rab-7L1-like [Anarrhichthys ocellatus]
Dxb_GLEAN_10017442	0.0166667	0.62	5.21723	0.00195213	0.030812	Htra4	PREDICTED: serine protease HTRA1-like isoform X2 [Lates calcarifer]
Dxb_GLEAN_10017485	0.0266667	0.206667	2.9542	0.00195324	0.030812	SUSD1	PREDICTED: sushi domain-containing protein 1-like [Lates calcarifer]
Dxb_GLEAN_10013905	0.103333	0.683333	2.72528	0.00195581	0.030812	--	ermin-like [Cottoperca gobio]
Dxb_GLEAN_10000548	7.72333	15.7067	1.02408	0.00195642	0.030812	hbb2	RecName: Full=Hemoglobin subunit beta; AltName: Full=Beta-globin; AltName: Full=Hemoglobin beta chain [Cottoperca gobio]
Dxb_GLEAN_10022254	1.87333	0.836667	-1.16288	0.00199352	0.031225	KLHDC7A	kelch domain-containing protein 7A-like [Sander lucioperca]
Dxb_GLEAN_10014648	0.656667	1.61667	1.29979	0.00209775	0.0323642	foxi1e	forkhead box protein I1 [Seriola dumerili]
MSTRG.16623	2.64	1.22667	-1.10579	0.00209823	0.0323642	--	-
Dxb_GLEAN_10001901	2.57667	0.61	-2.07862	0.00209864	0.0323642	--	transmembrane protein 53-like isoform X3 [Perca flavescens]
Dxb_GLEAN_10005616	0.416667	1.74	2.06212	0.00212507	0.0327058	Hcar2	hydroxycarboxylic acid receptor 2-like [Perca flavescens]
Dxb_GLEAN_10000419	5.36	1.46333	-1.87297	0.00218158	0.0333744	--	E3 ubiquitin/ISG15 ligase TRIM25-like [Astatotilapia calliptera]
Dxb_GLEAN_10003670	0.16	0.356667	1.1565	0.00220682	0.0336687	NWD2	LOW QUALITY PROTEIN: NACHT and WD repeat domain-containing protein 2 [Perca flavescens]
Dxb_GLEAN_10002491	2.12333	0.74	-1.52073	0.00223402	0.0339282	--	immune-associated nucleotide-binding protein 12-like [Perca flavescens]
Dxb_GLEAN_10001324	1.50667	0.483333	-1.64027	0.00226384	0.0342369	cyp2k1	cytochrome P450 2K1-like isoform X1 [Seriola dumerili]
Dxb_GLEAN_10010300	1.07667	2.62	1.283	0.0022754	0.0343297	--	NK-lysin [Hyporthodus septemfasciatus]
Dxb_GLEAN_10021401	0.153333	0.496667	1.69561	0.00227989	0.0343749	Cntn3	Contactin-3 [Dicentrarchus labrax]
Dxb_GLEAN_10003947	0.52	1.08	1.05445	0.0023419	0.0350111	Prrt4	proline-rich transmembrane protein 4 [Perca flavescens]
MSTRG.15784	627.54	209.073	-1.5857	0.00237453	0.0354068	COLEC10	AEM37704.1 nattectin, partial [Epinephelus bruneus]
Dxb_GLEAN_10002159	0.001	0.516667	9.01309	0.00240634	0.0357883	--	syncytin-A-like [Astyanax mexicanus]
MSTRG.23526	1.83	0.303333	-2.59287	0.00247581	0.036638	Myh8	XP_028310674.1 myosin heavy chain, fast skeletal muscle [Gouania willdenowi]
Dxb_GLEAN_10013816	0.736667	0.0633333	-3.53998	0.00255271	0.0375519	CLDN14	PREDICTED: claudin-14 [Lates calcarifer]
Dxb_GLEAN_10010312	0.05	0.233333	2.22239	0.00256067	0.037645	IMPG1	interphotoreceptor matrix proteoglycan 1-like isoform X4 [Seriola lalandi dorsalis]
MSTRG.27124	2.39667	6.53333	1.44679	0.0025631	0.0376452	EPRS1	XP_029312476.1 LOW QUALITY PROTEIN: bifunctional glutamate/proline--tRNA ligase [Cottoperca gobio]
Dxb_GLEAN_10019149	0.0833333	0.566667	2.76553	0.00263692	0.0384706	TAAR1	trace amine-associated receptor 1-like [Perca flavescens]
Dxb_GLEAN_10020438	0.266667	1.42	2.41278	0.00264779	0.0385132	RGS16	regulator of G-protein signaling 5-like [Sander lucioperca]
Dxb_GLEAN_10022384	1.79667	0.473333	-1.92439	0.00265072	0.0385251	DNASE1	deoxyribonuclease-1-like [Anabas testudineus]
MSTRG.16641	1.77333	0.376667	-2.2351	0.00268748	0.0389362	BCO2	AWO98473.1 Hypothetical protein SMAX5B_008472 [Scophthalmus maximus]
MSTRG.10524	1.26	0.336667	-1.90403	0.00270406	0.0391271	--	XP_023252553.1 tripartite motif-containing protein 16-like [Seriola lalandi dorsalis]
MSTRG.17057	0.286667	0.946667	1.72348	0.00271082	0.0392003	RPGR	XP_027147369.1 X-linked retinitis pigmentosa GTPase regulator-like isoform X1 [Larimichthys crocea]
Dxb_GLEAN_10018256	0.0766667	1.25667	4.03486	0.00272057	0.0392425	il1b	interleukin-1 beta [Etheostoma spectabile]
MSTRG.21652	1.88	4.07	1.1143	0.00277066	0.0397404	Gls2	KAF3706037.1 Glutaminase liver isoform, mitochondrial [Channa argus]
Dxb_GLEAN_10001043	6.73	3.19667	-1.07404	0.00285792	0.0407125	--	immune-associated nucleotide-binding protein 12-like [Perca flavescens]
Dxb_GLEAN_10016658	0.183333	0.593333	1.69437	0.00289814	0.0412088	NFKBID	NF-kappa-B inhibitor delta I-kappa-B-delta [Collichthys lucidus]
Dxb_GLEAN_10009052	1.39667	0.346667	-2.01037	0.00294759	0.0418077	GJB7	gap junction beta-7 protein-like [Seriola lalandi dorsalis]
Dxb_GLEAN_10011260	0.24	0.0366667	-2.71049	0.00297896	0.0420458	GRIK1	glutamate receptor ionotropic, kainate 1-like isoform X2 [Perca flavescens]
Dxb_GLEAN_10010989	0.0833333	0.426667	2.35614	0.00299287	0.0421617	KCNJ5	G protein-activated inward rectifier potassium channel 3-like [Seriola lalandi dorsalis]
Dxb_GLEAN_10012759	0.766667	1.56667	1.03103	0.00300613	0.0422218	Map2k1	dual specificity mitogen-activated protein kinase kinase 1 [Epinephelus coioides]
Dxb_GLEAN_10019114	1.28333	0.533333	-1.26679	0.00332857	0.0451499	--	leucine-rich repeat-containing protein 15-like [Cottoperca gobio]
Dxb_GLEAN_10006306	2.76667	1.08333	-1.35267	0.0033333	0.0451874	PLCXD1	PI-PLC X domain-containing protein 1-like [Cottoperca gobio]
MSTRG.25606	1.27667	0.476667	-1.42133	0.00336224	0.0454189	Tgtp1	XP_027132184.1 T-cell-specific guanine nucleotide triphosphate-binding protein 1-like isoform X1 [Larimichthys crocea]
Dxb_GLEAN_10021691	0.19	0.513333	1.4339	0.00341385	0.0458361	ITIH3	inter-alpha-trypsin inhibitor heavy chain H3 [Sander lucioperca]
Dxb_GLEAN_10008568	0.0433333	0.143333	1.72583	0.00356325	0.0473822	Rp1l1	nucleoprotein TPR-like [Sparus aurata]
Dxb_GLEAN_10003727	1.08333	0.393333	-1.46165	0.00357665	0.0475054	SLC9B2	Sodium/hydrogen exchanger 9B2 [Larimichthys crocea]
Dxb_GLEAN_10017333	6.73333	2.00667	-1.74652	0.00358362	0.0475704	TP53INP1	LOW QUALITY PROTEIN: tumor protein p53-inducible nuclear protein 1 [Cottoperca gobio]
Dxb_GLEAN_10017945	0.17	0.42	1.30485	0.00359547	0.0477002	Kif27	kinesin-like protein KIF27 [Sander lucioperca]

## Sheet: Supplemental table 4
Supplemental table 4 Integrated analysis of DEMs and DEGs
miRNA	mRNA	rho	Symbol	Description
miR-100-y	Dxb_GLEAN_10004206	-0.942857	nxpe3	NXPE family member 3-like [Perca flavescens]
miR-100-y	Dxb_GLEAN_10004503	-0.828571	zic4	zinc finger protein ZIC 4-like isoform X2 [Acanthochromis polyacanthus]
miR-100-y	Dxb_GLEAN_10004504	-0.942857	zic1	zinc finger protein ZIC 1 isoform X2 [Larimichthys crocea]
miR-100-y	Dxb_GLEAN_10004674	-0.771429	CTNND2	catenin delta-2 isoform X1 [Larimichthys crocea]
miR-100-y	Dxb_GLEAN_10009052	-0.714286	GJB7	gap junction beta-7 protein-like [Seriola lalandi dorsalis]
miR-100-y	Dxb_GLEAN_10009825	-0.714286	SLC2A9	PREDICTED: solute carrier family 2, facilitated glucose transporter member 9-like [Lates calcarifer]
miR-100-y	Dxb_GLEAN_10014030	-0.771429	Tlr8	TLR8 [Epinephelus coioides]
miR-100-y	Dxb_GLEAN_10015796	-0.714286	TLR7	Toll-like receptor 9A [Epinephelus lanceolatus]
miR-100-y	Dxb_GLEAN_10016952	-0.714286	CLCN1	chloride channel protein 1 [Parambassis ranga]
miR-100-y	Dxb_GLEAN_10018772	-0.714286	TMPRSS13	PREDICTED: transmembrane protease serine 13-like [Lates calcarifer]
miR-100-y	Dxb_GLEAN_10019402	-0.771429	ACP5	tartrate-resistant acid phosphatase type 5 [Larimichthys crocea]
miR-122-x	Dxb_GLEAN_10001979	-1	TRIM21	E3 ubiquitin-protein ligase TRIM21-like [Perca flavescens]
miR-122-x	Dxb_GLEAN_10002645	-0.942857	Btn2a2	stonustoxin subunit beta-like [Etheostoma spectabile]
miR-122-x	Dxb_GLEAN_10005865	-0.885714	Adam9	disintegrin and metalloproteinase domain-containing protein 9-like isoform X1 [Sander lucioperca]
miR-122-x	Dxb_GLEAN_10007490	-0.714286	Mybpc2	myosin-binding protein C, fast-type isoform X1 [Anabas testudineus]
miR-122-x	Dxb_GLEAN_10016017	-0.771429	CHIT1	Chitinase-3-like protein 1 [Scophthalmus maximus]
miR-122-x	Dxb_GLEAN_10016241	-0.714286	--	C-type lectin domain family 10 member A-like [Sparus aurata]
miR-122-x	Dxb_GLEAN_10017823	-0.885714	SLC2A11	solute carrier family 2, facilitated glucose transporter member 11-like [Anarrhichthys ocellatus]
miR-122-x	Dxb_GLEAN_10018714	-0.942857	VTN	vitronectin [Cottoperca gobio]
miR-1271-x	Dxb_GLEAN_10003094	-0.714286	lyrm2	LYR motif-containing protein 2 [Parambassis ranga]
miR-1271-x	Dxb_GLEAN_10003433	-0.771429	jockey\pol	CR1-3 [Lycodichthys dearborni]
miR-1271-x	Dxb_GLEAN_10003956	-0.714286	TRIM27	tripartite motif protein 39 [Epinephelus coioides]
miR-1271-x	Dxb_GLEAN_10004238	-0.714286	TLR1	TLR1-2 [Epinephelus coioides]
miR-1271-x	Dxb_GLEAN_10005882	-0.771429	ddit4	DNA damage-inducible transcript 4 protein [Perca flavescens]
miR-1271-x	Dxb_GLEAN_10008100	-0.753702	iaaA	Isoaspartyl peptidase [Liparis tanakae]
miR-1271-x	Dxb_GLEAN_10008635	-0.714286	FAM110C	protein FAM110C [Sander lucioperca]
miR-1271-x	Dxb_GLEAN_10009722	-0.885714	Nanp	N-acylneuraminate-9-phosphatase [Anarrhichthys ocellatus]
miR-1271-x	Dxb_GLEAN_10011199	-0.714286	Vwa7	PREDICTED: von Willebrand factor A domain-containing protein 7-like [Lates calcarifer]
miR-1271-x	Dxb_GLEAN_10011512	-0.771429	--	bromodomain-containing protein DDB_G0270170-like [Seriola lalandi dorsalis]
miR-1271-x	Dxb_GLEAN_10013553	-0.771429	Rep15	rab15 effector protein [Perca flavescens]
miR-1271-x	Dxb_GLEAN_10014954	-0.885714	SLC5A7	PREDICTED: high-affinity choline transporter 1-like isoform X1 [Lates calcarifer]
miR-1271-x	Dxb_GLEAN_10015944	-0.885714	DSC2	B-cadherin-like [Mastacembelus armatus]
miR-1271-x	Dxb_GLEAN_10016017	-0.942857	CHIT1	Chitinase-3-like protein 1 [Scophthalmus maximus]
miR-1271-x	Dxb_GLEAN_10016241	-0.885714	--	C-type lectin domain family 10 member A-like [Sparus aurata]
miR-1271-x	Dxb_GLEAN_10017861	-0.828571	CMKLR1	chemokine-like receptor 1 [Amphiprion ocellaris]
miR-1271-x	Dxb_GLEAN_10018904	-0.771429	arhgap32	rho GTPase-activating protein 32-like [Sander lucioperca]
miR-1271-x	Dxb_GLEAN_10020668	-0.885714	Slc5a5	PREDICTED: LOW QUALITY PROTEIN: sodium/iodide cotransporter [Lates calcarifer]
miR-1296-x	Dxb_GLEAN_10016017	-0.942857	CHIT1	Chitinase-3-like protein 1 [Scophthalmus maximus]
miR-152-x	Dxb_GLEAN_10002249	-0.845154	MFAP4	microfibril-associated glycoprotein 4-like isoform X2 [Astatotilapia calliptera]
miR-152-x	Dxb_GLEAN_10004238	-0.845154	TLR1	TLR1-2 [Epinephelus coioides]
miR-152-x	Dxb_GLEAN_10012229	-0.845154	TIMM44	mitochondrial import inner membrane translocase subunit TIM44-like isoform X2 [Anarrhichthys ocellatus]
miR-152-x	Dxb_GLEAN_10015604	-0.845154	hes4-b	transcription factor HES-4 isoform X1 [Sander lucioperca]
miR-152-x	Dxb_GLEAN_10018403	-0.845154	A2m	alpha-2-macroglobulin-like [Sander lucioperca]
miR-152-x	Dxb_GLEAN_10018659	-0.845154	tyr	tyrosinase [Seriola lalandi dorsalis]
miR-1839-x	Dxb_GLEAN_10017404	-0.714286	ccdc125	coiled-coil domain-containing protein 125 isoform X2 [Cottoperca gobio]
miR-185-y	Dxb_GLEAN_10003436	-0.942857	dctn6	Dynactin subunit 6 [Collichthys lucidus]
miR-185-y	Dxb_GLEAN_10006169	-0.828571	SLC16A6	monocarboxylate transporter 7-like [Sander lucioperca]
miR-185-y	Dxb_GLEAN_10013922	-0.771429	Ifih1	melanoma differentiation associated protein-5 [Epinephelus coioides]
miR-185-y	Dxb_GLEAN_10020668	-0.771429	Slc5a5	PREDICTED: LOW QUALITY PROTEIN: sodium/iodide cotransporter [Lates calcarifer]
miR-185-y	Dxb_GLEAN_10021426	-0.942857	snrpe	small nuclear ribonucleoprotein E isoform X1 [Paramormyrops kingsleyae]
miR-187-x	Dxb_GLEAN_10003947	-0.828571	Prrt4	proline-rich transmembrane protein 4 [Perca flavescens]
miR-187-x	Dxb_GLEAN_10004401	-0.771429	--	TNFAIP3-interacting protein 1-like [Larimichthys crocea]
miR-187-x	Dxb_GLEAN_10005021	-0.885714	PTGES	PREDICTED: prostaglandin E synthase [Stegastes partitus]
miR-187-x	Dxb_GLEAN_10008319	-0.828571	Sox11	transcription factor Sox-11-like [Sparus aurata]
miR-187-x	Dxb_GLEAN_10008591	-0.885714	Jdp2	jun dimerization protein 2-like [Perca flavescens]
miR-187-x	Dxb_GLEAN_10010261	-0.714286	Cp1	cathepsin L1-like [Echeneis naucrates]
miR-187-x	Dxb_GLEAN_10010815	-0.828571	EGR1	early growth response protein 1-like [Seriola dumerili]
miR-187-x	Dxb_GLEAN_10012150	-0.828571	FAM102B	LOW QUALITY PROTEIN: protein FAM102B-like [Cottoperca gobio]
miR-187-x	Dxb_GLEAN_10016177	-0.828571	Camk1g	calcium/calmodulin-dependent protein kinase type 1D-like [Seriola dumerili]
miR-187-x	Dxb_GLEAN_10016628	-0.885714	HAS1	hyaluronan synthase 1 [Sander lucioperca]
miR-187-x	Dxb_GLEAN_10021733	-0.811679	Sla2	src-like-adapter 2 isoform X2 [Etheostoma spectabile]
miR-192-x	Dxb_GLEAN_10005939	-0.885714	Adam11	disintegrin and metalloproteinase domain-containing protein 11 isoform X4 [Perca flavescens]
miR-192-x	Dxb_GLEAN_10011075	-0.885714	SLC6A12	sodium- and chloride-dependent GABA transporter 2-like [Seriola lalandi dorsalis]
miR-192-x	Dxb_GLEAN_10012750	-0.724714	HEXA	beta-hexosaminidase subunit alpha-like isoform X1 [Sander lucioperca]
miR-192-x	Dxb_GLEAN_10016241	-0.771429	--	C-type lectin domain family 10 member A-like [Sparus aurata]
miR-192-x	Dxb_GLEAN_10016361	-0.714286	MC5R	melanocortin receptor 5-like [Acanthochromis polyacanthus]
miR-192-x	Dxb_GLEAN_10017333	-0.714286	TP53INP1	LOW QUALITY PROTEIN: tumor protein p53-inducible nuclear protein 1 [Cottoperca gobio]
miR-192-x	Dxb_GLEAN_10020668	-0.771429	Slc5a5	PREDICTED: LOW QUALITY PROTEIN: sodium/iodide cotransporter [Lates calcarifer]
miR-192-x	Dxb_GLEAN_10021426	-0.942857	snrpe	small nuclear ribonucleoprotein E isoform X1 [Paramormyrops kingsleyae]
miR-192-z	Dxb_GLEAN_10001901	-0.771429	--	transmembrane protein 53-like isoform X3 [Perca flavescens]
miR-192-z	Dxb_GLEAN_10002645	-0.714286	Btn2a2	stonustoxin subunit beta-like [Etheostoma spectabile]
miR-192-z	Dxb_GLEAN_10003436	-0.771429	dctn6	Dynactin subunit 6 [Collichthys lucidus]
miR-192-z	Dxb_GLEAN_10004206	-0.885714	nxpe3	NXPE family member 3-like [Perca flavescens]
miR-192-z	Dxb_GLEAN_10004504	-0.885714	zic1	zinc finger protein ZIC 1 isoform X2 [Larimichthys crocea]
miR-192-z	Dxb_GLEAN_10006169	-0.714286	SLC16A6	monocarboxylate transporter 7-like [Sander lucioperca]
miR-192-z	Dxb_GLEAN_10007490	-0.771429	Mybpc2	myosin-binding protein C, fast-type isoform X1 [Anabas testudineus]
miR-192-z	Dxb_GLEAN_10007588	-0.714286	mreg	melanoregulin-like [Larimichthys crocea]
miR-192-z	Dxb_GLEAN_10009722	-0.942857	Nanp	N-acylneuraminate-9-phosphatase [Anarrhichthys ocellatus]
miR-192-z	Dxb_GLEAN_10010690	-0.771429	Mslnl	mesothelin isoform X5 [Astatotilapia calliptera]
miR-192-z	Dxb_GLEAN_10011075	-0.885714	SLC6A12	sodium- and chloride-dependent GABA transporter 2-like [Seriola lalandi dorsalis]
miR-192-z	Dxb_GLEAN_10011149	-0.714286	ASL	argininosuccinate lyase [Cottoperca gobio]
miR-192-z	Dxb_GLEAN_10011199	-0.771429	Vwa7	PREDICTED: von Willebrand factor A domain-containing protein 7-like [Lates calcarifer]
miR-192-z	Dxb_GLEAN_10011350	-0.811679	amer2	APC membrane recruitment protein 2-like [Takifugu rubripes]
miR-192-z	Dxb_GLEAN_10015812	-0.771429	samhd1	deoxynucleoside triphosphate triphosphohydrolase SAMHD1-like [Sparus aurata]
miR-192-z	Dxb_GLEAN_10016131	-0.771429	RSBN1	lysine-specific demethylase 9-like [Sander lucioperca]
miR-192-z	Dxb_GLEAN_10016559	-0.771429	COLEC10	collectin-10 isoform X1 [Sander lucioperca]
miR-192-z	Dxb_GLEAN_10016952	-0.771429	CLCN1	chloride channel protein 1 [Parambassis ranga]
miR-192-z	Dxb_GLEAN_10017404	-0.771429	ccdc125	coiled-coil domain-containing protein 125 isoform X2 [Cottoperca gobio]
miR-192-z	Dxb_GLEAN_10017823	-0.771429	SLC2A11	solute carrier family 2, facilitated glucose transporter member 11-like [Anarrhichthys ocellatus]
miR-192-z	Dxb_GLEAN_10022254	-0.771429	KLHDC7A	kelch domain-containing protein 7A-like [Sander lucioperca]
miR-194-x	Dxb_GLEAN_10001901	-0.714286	--	transmembrane protein 53-like isoform X3 [Perca flavescens]
miR-194-x	Dxb_GLEAN_10003424	-0.771429	tyrp1	5,6-dihydroxyindole-2-carboxylic acid oxidase [Seriola dumerili]
miR-194-x	Dxb_GLEAN_10004674	-0.771429	CTNND2	catenin delta-2 isoform X1 [Larimichthys crocea]
miR-194-x	Dxb_GLEAN_10005088	-0.714286	--	gonadal soma-derived factor [Epinephelus akaara]
miR-194-x	Dxb_GLEAN_10007758	-0.828571	--	myosin-7-like protein [Labeo rohita]
miR-194-x	Dxb_GLEAN_10008308	-0.714286	--	trichohyalin-like [Perca flavescens]
miR-194-x	Dxb_GLEAN_10009262	-0.771429	SULT3A1	amine sulfotransferase-like [Cottoperca gobio]
miR-194-x	Dxb_GLEAN_10009722	-0.885714	Nanp	N-acylneuraminate-9-phosphatase [Anarrhichthys ocellatus]
miR-194-x	Dxb_GLEAN_10009922	-0.714286	MIMI_R795	Ubiquitin-conjugating enzyme E2 E2 [Channa argus]
miR-194-x	Dxb_GLEAN_10011149	-0.771429	ASL	argininosuccinate lyase [Cottoperca gobio]
miR-194-x	Dxb_GLEAN_10012778	-0.771429	TRIM27	zinc-binding protein A33-like [Sander lucioperca]
miR-194-x	Dxb_GLEAN_10013816	-0.771429	CLDN14	PREDICTED: claudin-14 [Lates calcarifer]
miR-194-x	Dxb_GLEAN_10015604	-0.771429	hes4-b	transcription factor HES-4 isoform X1 [Sander lucioperca]
miR-194-x	Dxb_GLEAN_10016131	-0.885714	RSBN1	lysine-specific demethylase 9-like [Sander lucioperca]
miR-194-x	Dxb_GLEAN_10017333	-0.771429	TP53INP1	LOW QUALITY PROTEIN: tumor protein p53-inducible nuclear protein 1 [Cottoperca gobio]
miR-194-x	Dxb_GLEAN_10017823	-0.714286	SLC2A11	solute carrier family 2, facilitated glucose transporter member 11-like [Anarrhichthys ocellatus]
miR-194-x	Dxb_GLEAN_10018559	-0.714286	--	complement C1q and tumor necrosis factor-related protein 9 [Larimichthys crocea]
miR-194-x	Dxb_GLEAN_10020618	-0.771429	ARRDC2	arrestin domain-containing protein 2 isoform X2 [Larimichthys crocea]
miR-196-z	Dxb_GLEAN_10016237	-0.828571	RAB29	ras-related protein Rab-7L1-like [Anarrhichthys ocellatus]
miR-196-z	Dxb_GLEAN_10022384	-0.885714	DNASE1	deoxyribonuclease-1-like [Anabas testudineus]
miR-196-z	Dxb_GLEAN_10022617	-0.942857	scg3	secretogranin-3 isoform X1 [Larimichthys crocea]
miR-215-x	Dxb_GLEAN_10002350	-0.758971	--	TYRO protein tyrosine kinase-binding protein [Larimichthys crocea]
miR-215-x	Dxb_GLEAN_10005939	-0.758971	Adam11	disintegrin and metalloproteinase domain-containing protein 11 isoform X4 [Perca flavescens]
miR-215-x	Dxb_GLEAN_10007951	-0.758971	--	uncharacterized LOC103392932 precursor [Cynoglossus semilaevis]
miR-215-x	Dxb_GLEAN_10011075	-0.941124	SLC6A12	sodium- and chloride-dependent GABA transporter 2-like [Seriola lalandi dorsalis]
miR-215-x	Dxb_GLEAN_10012750	-0.739249	HEXA	beta-hexosaminidase subunit alpha-like isoform X1 [Sander lucioperca]
miR-215-x	Dxb_GLEAN_10016361	-0.758971	MC5R	melanocortin receptor 5-like [Acanthochromis polyacanthus]
miR-215-x	Dxb_GLEAN_10017333	-0.941124	TP53INP1	LOW QUALITY PROTEIN: tumor protein p53-inducible nuclear protein 1 [Cottoperca gobio]
miR-215-x	Dxb_GLEAN_10018532	-0.758971	mmp13	collagenase 3-like [Sander lucioperca]
miR-215-x	Dxb_GLEAN_10021426	-0.880406	snrpe	small nuclear ribonucleoprotein E isoform X1 [Paramormyrops kingsleyae]
miR-215-z	Dxb_GLEAN_10002350	-0.758971	--	TYRO protein tyrosine kinase-binding protein [Larimichthys crocea]
miR-215-z	Dxb_GLEAN_10005939	-0.758971	Adam11	disintegrin and metalloproteinase domain-containing protein 11 isoform X4 [Perca flavescens]
miR-215-z	Dxb_GLEAN_10007951	-0.758971	--	uncharacterized LOC103392932 precursor [Cynoglossus semilaevis]
miR-215-z	Dxb_GLEAN_10011075	-0.941124	SLC6A12	sodium- and chloride-dependent GABA transporter 2-like [Seriola lalandi dorsalis]
miR-215-z	Dxb_GLEAN_10012750	-0.739249	HEXA	beta-hexosaminidase subunit alpha-like isoform X1 [Sander lucioperca]
miR-215-z	Dxb_GLEAN_10016361	-0.758971	MC5R	melanocortin receptor 5-like [Acanthochromis polyacanthus]
miR-215-z	Dxb_GLEAN_10017333	-0.941124	TP53INP1	LOW QUALITY PROTEIN: tumor protein p53-inducible nuclear protein 1 [Cottoperca gobio]
miR-215-z	Dxb_GLEAN_10018532	-0.758971	mmp13	collagenase 3-like [Sander lucioperca]
miR-215-z	Dxb_GLEAN_10021426	-0.880406	snrpe	small nuclear ribonucleoprotein E isoform X1 [Paramormyrops kingsleyae]
miR-2188-x	Dxb_GLEAN_10005939	-0.771429	Adam11	disintegrin and metalloproteinase domain-containing protein 11 isoform X4 [Perca flavescens]
miR-2188-x	Dxb_GLEAN_10005989	-0.771429	Tecta	PREDICTED: LOW QUALITY PROTEIN: IgGFc-binding protein-like [Lates calcarifer]
miR-2188-x	Dxb_GLEAN_10007490	-0.828571	Mybpc2	myosin-binding protein C, fast-type isoform X1 [Anabas testudineus]
miR-2188-x	Dxb_GLEAN_10007951	-0.771429	--	uncharacterized LOC103392932 precursor [Cynoglossus semilaevis]
miR-2188-x	Dxb_GLEAN_10008308	-0.828571	--	trichohyalin-like [Perca flavescens]
miR-2188-x	Dxb_GLEAN_10012229	-0.828571	TIMM44	mitochondrial import inner membrane translocase subunit TIM44-like isoform X2 [Anarrhichthys ocellatus]
miR-2188-x	Dxb_GLEAN_10013214	-0.771429	SLC23A1	solute carrier family 23 member 1-like [Seriola lalandi dorsalis]
miR-2188-x	Dxb_GLEAN_10015796	-0.714286	TLR7	Toll-like receptor 9A [Epinephelus lanceolatus]
miR-2188-x	Dxb_GLEAN_10017425	-0.771429	marveld2	MARVEL domain-containing protein 2-like [Etheostoma spectabile]
miR-2188-x	Dxb_GLEAN_10022390	-0.714286	Trim39	nuclear factor 7, ovary-like [Seriola dumerili]
miR-339-x	Dxb_GLEAN_10005088	-0.714286	--	gonadal soma-derived factor [Epinephelus akaara]
miR-340-x	Dxb_GLEAN_10001227	-0.753702	KMT5C	PREDICTED: histone-lysine N-methyltransferase KMT5C-like isoform X4 [Lates calcarifer]
miR-340-x	Dxb_GLEAN_10015654	-0.828571	KIAA1324	UPF0577 protein KIAA1324 homolog isoform X1 [Perca flavescens]
miR-342-y	Dxb_GLEAN_10015654	-0.714286	KIAA1324	UPF0577 protein KIAA1324 homolog isoform X1 [Perca flavescens]
miR-3549-z	Dxb_GLEAN_10002861	-0.771429	PNMA2	zinc finger CCHC domain-containing 12-like protein [Labeo rohita]
miR-3549-z	Dxb_GLEAN_10005936	-0.898645	KLHL11	kelch-like protein 11 [Perca flavescens]
miR-3549-z	Dxb_GLEAN_10009255	-0.885714	Sdccag8	serologically defined colon cancer antigen 8 isoform X2 [Cottoperca gobio]
miR-3549-z	Dxb_GLEAN_10010300	-0.771429	--	NK-lysin [Hyporthodus septemfasciatus]
miR-3549-z	Dxb_GLEAN_10010312	-0.758971	IMPG1	interphotoreceptor matrix proteoglycan 1-like isoform X4 [Seriola lalandi dorsalis]
miR-3549-z	Dxb_GLEAN_10023095	-0.771429	SALL1	PREDICTED: sal-like protein 1 [Lates calcarifer]
miR-451-x	Dxb_GLEAN_10001227	-0.898645	KMT5C	PREDICTED: histone-lysine N-methyltransferase KMT5C-like isoform X4 [Lates calcarifer]
miR-451-x	Dxb_GLEAN_10001901	-0.828571	--	transmembrane protein 53-like isoform X3 [Perca flavescens]
miR-451-x	Dxb_GLEAN_10009922	-0.828571	MIMI_R795	Ubiquitin-conjugating enzyme E2 E2 [Channa argus]
miR-451-x	Dxb_GLEAN_10012322	-0.828571	b3gnt5a	lactosylceramide 1,3-N-acetyl-beta-D-glucosaminyltransferase [Sander lucioperca]
miR-451-x	Dxb_GLEAN_10022254	-0.828571	KLHDC7A	kelch domain-containing protein 7A-like [Sander lucioperca]
miR-466-x	Dxb_GLEAN_10001168	-0.771429	Gimap9	GTPase IMAP family member 9-like isoform X2 [Sander lucioperca]
miR-466-x	Dxb_GLEAN_10001241	-0.942857	cyp2k4	cytochrome P450 2K1-like [Parambassis ranga]
miR-466-x	Dxb_GLEAN_10001282	-0.828571	--	MHC class Ia antigen [Dicentrarchus labrax]
miR-466-x	Dxb_GLEAN_10002350	-0.828571	--	TYRO protein tyrosine kinase-binding protein [Larimichthys crocea]
miR-466-x	Dxb_GLEAN_10002645	-0.828571	Btn2a2	stonustoxin subunit beta-like [Etheostoma spectabile]
miR-466-x	Dxb_GLEAN_10003436	-0.771429	dctn6	Dynactin subunit 6 [Collichthys lucidus]
miR-466-x	Dxb_GLEAN_10003645	-0.942857	--	PREDICTED: polyubiquitin-like [Neolamprologus brichardi]
miR-466-x	Dxb_GLEAN_10004207	-0.885714	ST8SIA6	PREDICTED: alpha-2,8-sialyltransferase 8E-like [Notothenia coriiceps]
miR-466-x	Dxb_GLEAN_10004674	-0.714286	CTNND2	catenin delta-2 isoform X1 [Larimichthys crocea]
miR-466-x	Dxb_GLEAN_10005539	-0.828571	GRK5	G protein-coupled receptor kinase 5-like isoform X2 [Sparus aurata]
miR-466-x	Dxb_GLEAN_10005812	-0.828571	Nlrc3	NACHT, LRR and PYD domains-containing protein 3-like isoform X1 [Anarrhichthys ocellatus]
miR-466-x	Dxb_GLEAN_10005988	-0.942857	Tecta	PREDICTED: LOW QUALITY PROTEIN: IgGFc-binding protein-like [Lates calcarifer]
miR-466-x	Dxb_GLEAN_10006032	-1	PRSS36	transmembrane protease serine 9-like isoform X1 [Betta splendens]
miR-466-x	Dxb_GLEAN_10006446	-0.771429	Mr1	MHC class I antigen, partial [Dicentrarchus labrax]
miR-466-x	Dxb_GLEAN_10006448	-0.885714	chs-2	chitin synthase chs-1-like [Sparus aurata]
miR-466-x	Dxb_GLEAN_10006471	-0.942857	STYK1	tyrosine-protein kinase STYK1-like [Acanthochromis polyacanthus]
miR-466-x	Dxb_GLEAN_10007490	-0.771429	Mybpc2	myosin-binding protein C, fast-type isoform X1 [Anabas testudineus]
miR-466-x	Dxb_GLEAN_10007588	-0.828571	mreg	melanoregulin-like [Larimichthys crocea]
miR-466-x	Dxb_GLEAN_10007825	-0.771429	lgals3bpb	galectin-3-binding protein [Sander lucioperca]
miR-466-x	Dxb_GLEAN_10007866	-0.942857	PRKAR1B	PREDICTED: cAMP-dependent protein kinase type I-beta regulatory subunit [Stegastes partitus]
miR-466-x	Dxb_GLEAN_10007922	-1	Noxo1	NADPH oxidase organizer 1-like [Cottoperca gobio]
miR-466-x	Dxb_GLEAN_10007949	-0.714286	--	GATA zinc finger domain-containing protein 14-like [Anarrhichthys ocellatus]
miR-466-x	Dxb_GLEAN_10007951	-1	--	uncharacterized LOC103392932 precursor [Cynoglossus semilaevis]
miR-466-x	Dxb_GLEAN_10008100	-0.898645	iaaA	Isoaspartyl peptidase [Liparis tanakae]
miR-466-x	Dxb_GLEAN_10008635	-0.771429	FAM110C	protein FAM110C [Sander lucioperca]
miR-466-x	Dxb_GLEAN_10009942	-0.771429	Ky	kyphoscoliosis peptidase [Sander lucioperca]
miR-466-x	Dxb_GLEAN_10010317	-0.828571	Cmpk2	UMP-CMP kinase 2, mitochondrial [Sander lucioperca]
miR-466-x	Dxb_GLEAN_10010431	-0.771429	Cd209d	C-type lectin domain family 4 member C Blood dendritic cell antigen 2 [Larimichthys crocea]
miR-466-x	Dxb_GLEAN_10011149	-0.828571	ASL	argininosuccinate lyase [Cottoperca gobio]
miR-466-x	Dxb_GLEAN_10011186	-0.828571	CLDN4	claudin-4-like [Seriola lalandi dorsalis]
miR-466-x	Dxb_GLEAN_10011260	-0.714286	GRIK1	glutamate receptor ionotropic, kainate 1-like isoform X2 [Perca flavescens]
miR-466-x	Dxb_GLEAN_10011350	-0.753702	amer2	APC membrane recruitment protein 2-like [Takifugu rubripes]
miR-466-x	Dxb_GLEAN_10011899	-0.771429	CYSLTR2	chemokine XC receptor 1-like [Myripristis murdjan]
miR-466-x	Dxb_GLEAN_10012238	-0.771429	RAB3A	ras-related protein Rab-3A-like [Anabas testudineus]
miR-466-x	Dxb_GLEAN_10012393	-0.942857	GRINA	protein lifeguard 1-like [Anarrhichthys ocellatus]
miR-466-x	Dxb_GLEAN_10012654	-0.714286	OTOGL	phosphatidylinositol phosphatase PTPRQ [Seriola dumerili]
miR-466-x	Dxb_GLEAN_10012708	-0.942857	--	pro-neuregulin-4, membrane-bound isoform [Cottoperca gobio]
miR-466-x	Dxb_GLEAN_10012808	-0.942857	ANO9	anoctamin-9 [Sparus aurata]
miR-466-x	Dxb_GLEAN_10012856	-0.942857	Smim29	LOW QUALITY PROTEIN: protein Bouncer-like [Sander lucioperca]
miR-466-x	Dxb_GLEAN_10013922	-0.942857	Ifih1	melanoma differentiation associated protein-5 [Epinephelus coioides]
miR-466-x	Dxb_GLEAN_10013941	-0.942857	Rdh16	retinol dehydrogenase 7-like [Perca flavescens]
miR-466-x	Dxb_GLEAN_10015984	-1	SARG	specifically androgen-regulated gene protein-like isoform X1 [Sander lucioperca]
miR-466-x	Dxb_GLEAN_10016237	-0.771429	RAB29	ras-related protein Rab-7L1-like [Anarrhichthys ocellatus]
miR-466-x	Dxb_GLEAN_10017333	-0.828571	TP53INP1	LOW QUALITY PROTEIN: tumor protein p53-inducible nuclear protein 1 [Cottoperca gobio]
miR-466-x	Dxb_GLEAN_10018532	-0.942857	mmp13	collagenase 3-like [Sander lucioperca]
miR-466-x	Dxb_GLEAN_10018714	-0.828571	VTN	vitronectin [Cottoperca gobio]
miR-466-x	Dxb_GLEAN_10019896	-0.885714	GIMAP7	GTPase IMAP family member 4-like isoform X2 [Etheostoma spectabile]
miR-466-x	Dxb_GLEAN_10020133	-0.714286	tyrp1	5,6-dihydroxyindole-2-carboxylic acid oxidase-like isoform X1 [Parambassis ranga]
miR-466-x	Dxb_GLEAN_10020668	-0.771429	Slc5a5	PREDICTED: LOW QUALITY PROTEIN: sodium/iodide cotransporter [Lates calcarifer]
miR-466-x	Dxb_GLEAN_10020699	-0.942857	--	receptor-transporting protein 3-like [Perca flavescens]
miR-466-x	Dxb_GLEAN_10021072	-0.771429	PCSK9	proprotein convertase subtilisin/kexin type 9 [Larimichthys crocea]
miR-466-x	Dxb_GLEAN_10021167	-1	Oca2	PREDICTED: P protein [Paralichthys olivaceus]
miR-466-x	Dxb_GLEAN_10021849	-0.880406	PGA	pepsin A-like [Perca flavescens]
miR-466-x	Dxb_GLEAN_10022254	-0.771429	KLHDC7A	kelch domain-containing protein 7A-like [Sander lucioperca]
miR-589-x	Dxb_GLEAN_10004238	-0.885714	TLR1	TLR1-2 [Epinephelus coioides]
miR-589-x	Dxb_GLEAN_10005865	-0.885714	Adam9	disintegrin and metalloproteinase domain-containing protein 9-like isoform X1 [Sander lucioperca]
miR-589-x	Dxb_GLEAN_10005988	-0.885714	Tecta	PREDICTED: LOW QUALITY PROTEIN: IgGFc-binding protein-like [Lates calcarifer]
miR-589-x	Dxb_GLEAN_10006446	-0.714286	Mr1	MHC class I antigen, partial [Dicentrarchus labrax]
miR-589-x	Dxb_GLEAN_10009722	-0.885714	Nanp	N-acylneuraminate-9-phosphatase [Anarrhichthys ocellatus]
miR-589-x	Dxb_GLEAN_10011044	-0.714286	Trim11	tripartite motif-containing protein 16 [Larimichthys crocea]
miR-589-x	Dxb_GLEAN_10013816	-0.771429	CLDN14	PREDICTED: claudin-14 [Lates calcarifer]
miR-589-x	Dxb_GLEAN_10018719	-0.771429	AIFM3	apoptosis-inducing factor 3-like isoform X1 [Cottoperca gobio]
miR-625-x	Dxb_GLEAN_10003956	-0.758971	TRIM27	tripartite motif protein 39 [Epinephelus coioides]
miR-625-x	Dxb_GLEAN_10005865	-0.758971	Adam9	disintegrin and metalloproteinase domain-containing protein 9-like isoform X1 [Sander lucioperca]
miR-625-x	Dxb_GLEAN_10008480	-0.758971	Rhov	rho-related GTP-binding protein RhoV [Cynoglossus semilaevis]
miR-625-x	Dxb_GLEAN_10010510	-0.870968	PLD4	phospholipase D4 [Sander lucioperca]
miR-625-x	Dxb_GLEAN_10011149	-0.880406	ASL	argininosuccinate lyase [Cottoperca gobio]
miR-625-x	Dxb_GLEAN_10011350	-0.924062	amer2	APC membrane recruitment protein 2-like [Takifugu rubripes]
miR-625-x	Dxb_GLEAN_10018495	-0.880406	CD3D	T-cell surface glycoprotein CD3 gamma chain precursor [Anoplopoma fimbria]
miR-625-x	Dxb_GLEAN_10022617	-0.758971	scg3	secretogranin-3 isoform X1 [Larimichthys crocea]
miR-735-x	Dxb_GLEAN_10001241	-0.828571	cyp2k4	cytochrome P450 2K1-like [Parambassis ranga]
miR-735-x	Dxb_GLEAN_10002864	-0.885714	Selenoi	ethanolaminephosphotransferase 1 [Larimichthys crocea]
miR-735-x	Dxb_GLEAN_10003094	-0.828571	lyrm2	LYR motif-containing protein 2 [Parambassis ranga]
miR-735-x	Dxb_GLEAN_10003956	-0.828571	TRIM27	tripartite motif protein 39 [Epinephelus coioides]
miR-735-x	Dxb_GLEAN_10005989	-0.771429	Tecta	PREDICTED: LOW QUALITY PROTEIN: IgGFc-binding protein-like [Lates calcarifer]
miR-735-x	Dxb_GLEAN_10007950	-0.828571	--	uncharacterized LOC103392932 precursor [Cynoglossus semilaevis]
miR-735-x	Dxb_GLEAN_10014015	-0.828571	DCT	L-dopachrome tautomerase [Cottoperca gobio]
miR-735-x	Dxb_GLEAN_10015984	-0.771429	SARG	specifically androgen-regulated gene protein-like isoform X1 [Sander lucioperca]
miR-735-x	Dxb_GLEAN_10018904	-0.942857	arhgap32	rho GTPase-activating protein 32-like [Sander lucioperca]
miR-735-x	Dxb_GLEAN_10019798	-0.771429	--	pyrin-like [Perca flavescens]
miR-8159-x	Dxb_GLEAN_10002249	-0.828571	MFAP4	microfibril-associated glycoprotein 4-like isoform X2 [Astatotilapia calliptera]
miR-8159-x	Dxb_GLEAN_10004206	-0.885714	nxpe3	NXPE family member 3-like [Perca flavescens]
miR-8159-x	Dxb_GLEAN_10007490	-0.771429	Mybpc2	myosin-binding protein C, fast-type isoform X1 [Anabas testudineus]
miR-8159-x	Dxb_GLEAN_10007758	-0.771429	--	myosin-7-like protein [Labeo rohita]
miR-8159-x	Dxb_GLEAN_10007762	-0.714286	MYH1	PREDICTED: myosin heavy chain, fast skeletal muscle-like [Stegastes partitus]
miR-8159-x	Dxb_GLEAN_10008308	-0.771429	--	trichohyalin-like [Perca flavescens]
miR-8159-x	Dxb_GLEAN_10009262	-0.828571	SULT3A1	amine sulfotransferase-like [Cottoperca gobio]
miR-8159-x	Dxb_GLEAN_10009922	-0.771429	MIMI_R795	Ubiquitin-conjugating enzyme E2 E2 [Channa argus]
miR-8159-x	Dxb_GLEAN_10011260	-0.828571	GRIK1	glutamate receptor ionotropic, kainate 1-like isoform X2 [Perca flavescens]
miR-8159-x	Dxb_GLEAN_10012229	-0.942857	TIMM44	mitochondrial import inner membrane translocase subunit TIM44-like isoform X2 [Anarrhichthys ocellatus]
miR-8159-x	Dxb_GLEAN_10014954	-0.771429	SLC5A7	PREDICTED: high-affinity choline transporter 1-like isoform X1 [Lates calcarifer]
miR-8159-x	Dxb_GLEAN_10017404	-0.771429	ccdc125	coiled-coil domain-containing protein 125 isoform X2 [Cottoperca gobio]
miR-8159-x	Dxb_GLEAN_10018659	-0.828571	tyr	tyrosinase [Seriola lalandi dorsalis]
miR-8159-x	Dxb_GLEAN_10018719	-0.714286	AIFM3	apoptosis-inducing factor 3-like isoform X1 [Cottoperca gobio]
miR-8159-x	Dxb_GLEAN_10019114	-0.771429	--	leucine-rich repeat-containing protein 15-like [Cottoperca gobio]
miR-8159-x	Dxb_GLEAN_10022161	-0.885714	ITIH3	inter-alpha-trypsin inhibitor heavy chain H3-like [Sander lucioperca]
miR-873-x	Dxb_GLEAN_10009262	-0.811679	SULT3A1	amine sulfotransferase-like [Cottoperca gobio]
miR-873-x	Dxb_GLEAN_10015604	-0.811679	hes4-b	transcription factor HES-4 isoform X1 [Sander lucioperca]
novel-m0015-3p	Dxb_GLEAN_10001726	-0.771429	Trim16	tripartite motif-containing protein 16-like [Larimichthys crocea]
novel-m0015-3p	Dxb_GLEAN_10003557	-0.942857	secA	protein translocase subunit SecA-like [Mastacembelus armatus]
novel-m0015-3p	Dxb_GLEAN_10003575	-0.942857	--	PREDICTED: GTPase IMAP family member 7-like [Notothenia coriiceps]
novel-m0015-3p	Dxb_GLEAN_10003956	-0.828571	TRIM27	tripartite motif protein 39 [Epinephelus coioides]
novel-m0015-3p	Dxb_GLEAN_10005988	-0.828571	Tecta	PREDICTED: LOW QUALITY PROTEIN: IgGFc-binding protein-like [Lates calcarifer]
novel-m0015-3p	Dxb_GLEAN_10006032	-0.942857	PRSS36	transmembrane protease serine 9-like isoform X1 [Betta splendens]
novel-m0015-3p	Dxb_GLEAN_10006169	-0.771429	SLC16A6	monocarboxylate transporter 7-like [Sander lucioperca]
novel-m0015-3p	Dxb_GLEAN_10006306	-0.828571	PLCXD1	PI-PLC X domain-containing protein 1-like [Cottoperca gobio]
novel-m0015-3p	Dxb_GLEAN_10006448	-0.771429	chs-2	chitin synthase chs-1-like [Sparus aurata]
novel-m0015-3p	Dxb_GLEAN_10007058	-0.942857	--	Receptor-transporting protein 3 [Anoplopoma fimbria]
novel-m0015-3p	Dxb_GLEAN_10007922	-0.942857	Noxo1	NADPH oxidase organizer 1-like [Cottoperca gobio]
novel-m0015-3p	Dxb_GLEAN_10007950	-0.828571	--	uncharacterized LOC103392932 precursor [Cynoglossus semilaevis]
novel-m0015-3p	Dxb_GLEAN_10009052	-0.885714	GJB7	gap junction beta-7 protein-like [Seriola lalandi dorsalis]
novel-m0015-3p	Dxb_GLEAN_10009262	-0.771429	SULT3A1	amine sulfotransferase-like [Cottoperca gobio]
novel-m0015-3p	Dxb_GLEAN_10010317	-0.771429	Cmpk2	UMP-CMP kinase 2, mitochondrial [Sander lucioperca]
novel-m0015-3p	Dxb_GLEAN_10011899	-0.714286	CYSLTR2	chemokine XC receptor 1-like [Myripristis murdjan]
novel-m0015-3p	Dxb_GLEAN_10012808	-0.885714	ANO9	anoctamin-9 [Sparus aurata]
novel-m0015-3p	Dxb_GLEAN_10012856	-0.885714	Smim29	LOW QUALITY PROTEIN: protein Bouncer-like [Sander lucioperca]
novel-m0015-3p	Dxb_GLEAN_10015796	-0.714286	TLR7	Toll-like receptor 9A [Epinephelus lanceolatus]
novel-m0015-3p	Dxb_GLEAN_10015812	-0.828571	samhd1	deoxynucleoside triphosphate triphosphohydrolase SAMHD1-like [Sparus aurata]
novel-m0015-3p	Dxb_GLEAN_10016131	-0.828571	RSBN1	lysine-specific demethylase 9-like [Sander lucioperca]
novel-m0015-3p	Dxb_GLEAN_10016246	-0.714286	--	PREDICTED: mucin-5AC-like [Lates calcarifer]
novel-m0015-3p	Dxb_GLEAN_10018388	-0.714286	--	L-amino-acid oxidase-like isoform X2 [Sander lucioperca]
novel-m0015-3p	Dxb_GLEAN_10018904	-0.771429	arhgap32	rho GTPase-activating protein 32-like [Sander lucioperca]
novel-m0015-3p	Dxb_GLEAN_10020699	-0.828571	--	receptor-transporting protein 3-like [Perca flavescens]
novel-m0015-3p	Dxb_GLEAN_10021167	-0.942857	Oca2	PREDICTED: P protein [Paralichthys olivaceus]
novel-m0015-3p	Dxb_GLEAN_10022254	-0.828571	KLHDC7A	kelch domain-containing protein 7A-like [Sander lucioperca]
novel-m0019-5p	Dxb_GLEAN_10004674	-0.828571	CTNND2	catenin delta-2 isoform X1 [Larimichthys crocea]
novel-m0019-5p	Dxb_GLEAN_10017301	-0.771429	METTL27	methyltransferase-like protein 27 [Maylandia zebra]
novel-m0020-5p	Dxb_GLEAN_10004674	-0.828571	CTNND2	catenin delta-2 isoform X1 [Larimichthys crocea]
novel-m0020-5p	Dxb_GLEAN_10017301	-0.771429	METTL27	methyltransferase-like protein 27 [Maylandia zebra]
novel-m0040-3p	Dxb_GLEAN_10001555	-0.714286	H1-5	histone H1-like [Cottoperca gobio]
novel-m0040-3p	Dxb_GLEAN_10002278	-1	--	L-rhamnose-binding lectin SML-like [Sparus aurata]
novel-m0040-3p	Dxb_GLEAN_10003094	-0.828571	lyrm2	LYR motif-containing protein 2 [Parambassis ranga]
novel-m0040-3p	Dxb_GLEAN_10005194	-0.714286	MLANA	melanoma antigen recognized by T-cells 1 isoform X2 [Etheostoma spectabile]
novel-m0040-3p	Dxb_GLEAN_10005989	-0.771429	Tecta	PREDICTED: LOW QUALITY PROTEIN: IgGFc-binding protein-like [Lates calcarifer]
novel-m0040-3p	Dxb_GLEAN_10006446	-0.828571	Mr1	MHC class I antigen, partial [Dicentrarchus labrax]
novel-m0040-3p	Dxb_GLEAN_10006448	-0.942857	chs-2	chitin synthase chs-1-like [Sparus aurata]
novel-m0040-3p	Dxb_GLEAN_10007058	-0.771429	--	Receptor-transporting protein 3 [Anoplopoma fimbria]
novel-m0040-3p	Dxb_GLEAN_10009046	-0.828571	pm20d2	peptidase M20 domain-containing protein 2 [Larimichthys crocea]
novel-m0040-3p	Dxb_GLEAN_10009052	-0.714286	GJB7	gap junction beta-7 protein-like [Seriola lalandi dorsalis]
novel-m0040-3p	Dxb_GLEAN_10009262	-0.771429	SULT3A1	amine sulfotransferase-like [Cottoperca gobio]
novel-m0040-3p	Dxb_GLEAN_10009722	-0.828571	Nanp	N-acylneuraminate-9-phosphatase [Anarrhichthys ocellatus]
novel-m0040-3p	Dxb_GLEAN_10010317	-0.771429	Cmpk2	UMP-CMP kinase 2, mitochondrial [Sander lucioperca]
novel-m0040-3p	Dxb_GLEAN_10010690	-1	Mslnl	mesothelin isoform X5 [Astatotilapia calliptera]
novel-m0040-3p	Dxb_GLEAN_10011899	-0.714286	CYSLTR2	chemokine XC receptor 1-like [Myripristis murdjan]
novel-m0040-3p	Dxb_GLEAN_10012708	-0.828571	--	pro-neuregulin-4, membrane-bound isoform [Cottoperca gobio]
novel-m0040-3p	Dxb_GLEAN_10012808	-0.885714	ANO9	anoctamin-9 [Sparus aurata]
novel-m0040-3p	Dxb_GLEAN_10012856	-0.885714	Smim29	LOW QUALITY PROTEIN: protein Bouncer-like [Sander lucioperca]
novel-m0040-3p	Dxb_GLEAN_10013816	-0.942857	CLDN14	PREDICTED: claudin-14 [Lates calcarifer]
novel-m0040-3p	Dxb_GLEAN_10014954	-1	SLC5A7	PREDICTED: high-affinity choline transporter 1-like isoform X1 [Lates calcarifer]
novel-m0040-3p	Dxb_GLEAN_10016017	-0.942857	CHIT1	Chitinase-3-like protein 1 [Scophthalmus maximus]
novel-m0040-3p	Dxb_GLEAN_10016246	-0.714286	--	PREDICTED: mucin-5AC-like [Lates calcarifer]
novel-m0040-3p	Dxb_GLEAN_10016361	-0.771429	MC5R	melanocortin receptor 5-like [Acanthochromis polyacanthus]
novel-m0040-3p	Dxb_GLEAN_10017404	-0.828571	ccdc125	coiled-coil domain-containing protein 125 isoform X2 [Cottoperca gobio]
novel-m0040-3p	Dxb_GLEAN_10017419	-0.828571	HMGCR	3-hydroxy-3-methylglutaryl-CoA reductase [Epinephelus lanceolatus]
novel-m0040-3p	Dxb_GLEAN_10018028	-0.714286	Znf366	zinc finger protein 366-like [Cottoperca gobio]
novel-m0040-3p	Dxb_GLEAN_10018388	-0.885714	--	L-amino-acid oxidase-like isoform X2 [Sander lucioperca]
novel-m0040-3p	Dxb_GLEAN_10018714	-0.771429	VTN	vitronectin [Cottoperca gobio]
novel-m0040-3p	Dxb_GLEAN_10019896	-0.771429	GIMAP7	GTPase IMAP family member 4-like isoform X2 [Etheostoma spectabile]
novel-m0040-3p	Dxb_GLEAN_10020699	-0.828571	--	receptor-transporting protein 3-like [Perca flavescens]
novel-m0040-3p	Dxb_GLEAN_10021167	-0.771429	Oca2	PREDICTED: P protein [Paralichthys olivaceus]
novel-m0040-3p	Dxb_GLEAN_10022254	-0.828571	KLHDC7A	kelch domain-containing protein 7A-like [Sander lucioperca]
novel-m0051-3p	Dxb_GLEAN_10002603	-0.771429	myc	transcriptional regulator Myc-B-like isoform X2 [Sparus aurata]
novel-m0051-3p	Dxb_GLEAN_10002676	-0.828571	--	myelin-oligodendrocyte glycoprotein-like [Anarrhichthys ocellatus]
novel-m0051-3p	Dxb_GLEAN_10002859	-0.758971	--	sterile alpha motif domain-containing protein 3-like [Astyanax mexicanus]
novel-m0051-3p	Dxb_GLEAN_10003172	-0.941124	plcd4	1-phosphatidylinositol 4,5-bisphosphate phosphodiesterase delta-4 isoform X1 [Mastacembelus armatus]
novel-m0051-3p	Dxb_GLEAN_10003713	-0.985611	CDKL2	cyclin-dependent kinase-like 5 [Sander lucioperca]
novel-m0051-3p	Dxb_GLEAN_10003947	-0.828571	Prrt4	proline-rich transmembrane protein 4 [Perca flavescens]
novel-m0051-3p	Dxb_GLEAN_10004190	-0.714286	--	PREDICTED: fish-egg lectin-like [Lates calcarifer]
novel-m0051-3p	Dxb_GLEAN_10004707	-0.771429	Myh6	myosin-6-like [Amphiprion ocellaris]
novel-m0051-3p	Dxb_GLEAN_10004830	-0.885714	RTase	Carnitine O-palmitoyltransferase 2, mitochondrial [Takifugu flavidus]
novel-m0051-3p	Dxb_GLEAN_10005129	-0.828571	Klf4	Krueppel-like factor 4 isoform X2 [Sander lucioperca]
novel-m0051-3p	Dxb_GLEAN_10005672	-0.771429	ELOVL6	elongation of very long chain fatty acids protein 6-like [Seriola dumerili]
novel-m0051-3p	Dxb_GLEAN_10005746	-0.714286	Sema4g	semaphorin-4G [Cottoperca gobio]
novel-m0051-3p	Dxb_GLEAN_10006400	-0.942857	RTase	Transposable element [Takifugu flavidus]
novel-m0051-3p	Dxb_GLEAN_10008568	-0.714286	Rp1l1	nucleoprotein TPR-like [Sparus aurata]
novel-m0051-3p	Dxb_GLEAN_10008715	-0.811679	SIM1	single-minded homolog 1-like [Sparus aurata]
novel-m0051-3p	Dxb_GLEAN_10009147	-0.771429	ANKRD1	ankyrin repeat domain-containing protein 1 [Labrus bergylta]
novel-m0051-3p	Dxb_GLEAN_10009904	-0.885714	PRKD1	serine/threonine-protein kinase D1-like [Acanthochromis polyacanthus]
novel-m0051-3p	Dxb_GLEAN_10010312	-0.880406	IMPG1	interphotoreceptor matrix proteoglycan 1-like isoform X4 [Seriola lalandi dorsalis]
novel-m0051-3p	Dxb_GLEAN_10010815	-0.771429	EGR1	early growth response protein 1-like [Seriola dumerili]
novel-m0051-3p	Dxb_GLEAN_10012520	-0.828571	PAPPA2	pappalysin-2 [Perca flavescens]
novel-m0051-3p	Dxb_GLEAN_10012550	-0.811679	--	proteoglycan 4-like [Sander lucioperca]
novel-m0051-3p	Dxb_GLEAN_10013270	-0.714286	--	-
novel-m0051-3p	Dxb_GLEAN_10014195	-0.771429	ZIC2	PREDICTED: zinc finger protein ZIC 2 [Lates calcarifer]
novel-m0051-3p	Dxb_GLEAN_10014405	-0.771429	Enox1	PREDICTED: ecto-NOX disulfide-thiol exchanger 1 isoform X4 [Lepisosteus oculatus]
novel-m0051-3p	Dxb_GLEAN_10014714	-0.828571	dusp1-a	MAP kinase phosphatase 1 [Epinephelus coioides]
novel-m0051-3p	Dxb_GLEAN_10014817	-0.885714	ADAMTS3	PREDICTED: A disintegrin and metalloproteinase with thrombospondin motifs 2-like, partial [Notothenia coriiceps]
novel-m0051-3p	Dxb_GLEAN_10016251	-0.985611	pdzrn3b	PREDICTED: serine/arginine repetitive matrix protein 1-like [Austrofundulus limnaeus]
novel-m0051-3p	Dxb_GLEAN_10016694	-0.771429	hoxa13b	homeobox protein Hox-A13b [Cottoperca gobio]
novel-m0051-3p	Dxb_GLEAN_10019149	-0.753702	TAAR1	trace amine-associated receptor 1-like [Perca flavescens]
novel-m0051-3p	Dxb_GLEAN_10020432	-0.941124	C1orf226	carboxyl-terminal PDZ ligand of neuronal nitric oxide synthase protein-like [Myripristis murdjan]
novel-m0051-3p	Dxb_GLEAN_10020438	-0.771429	RGS16	regulator of G-protein signaling 5-like [Sander lucioperca]
novel-m0051-3p	Dxb_GLEAN_10020581	-0.714286	Prg4	proteoglycan 4-like isoform X2 [Sander lucioperca]
novel-m0051-3p	Dxb_GLEAN_10022068	-0.771429	EPHA2	ephrin type-A receptor 2-like [Anarrhichthys ocellatus]
novel-m0077-5p	Dxb_GLEAN_10000548	-0.771429	hbb2	RecName: Full=Hemoglobin subunit beta; AltName: Full=Beta-globin; AltName: Full=Hemoglobin beta chain [Cottoperca gobio]
novel-m0077-5p	Dxb_GLEAN_10002425	-0.724714	USP43	PREDICTED: ubiquitin carboxyl-terminal hydrolase 43-like isoform X1 [Lates calcarifer]
novel-m0077-5p	Dxb_GLEAN_10002676	-0.714286	--	myelin-oligodendrocyte glycoprotein-like [Anarrhichthys ocellatus]
novel-m0077-5p	Dxb_GLEAN_10007654	-0.771429	MAFK	transcription factor MafK [Seriola dumerili]
novel-m0077-5p	Dxb_GLEAN_10007692	-0.714286	ndel1b	nuclear distribution protein nudE-like 1-B [Cottoperca gobio]
novel-m0077-5p	Dxb_GLEAN_10008590	-0.714286	--	leucine-rich repeat-containing protein 74A-like [Perca flavescens]
novel-m0077-5p	Dxb_GLEAN_10016859	-0.753702	Prss1	pancreatic trypsinogen [Epinephelus coioides]
novel-m0077-5p	Dxb_GLEAN_10017260	-0.714286	MCL1	induced myeloid leukemia cell differentiation protein Mcl-1 homolog [Perca flavescens]
novel-m0077-5p	Dxb_GLEAN_10020581	-0.828571	Prg4	proteoglycan 4-like isoform X2 [Sander lucioperca]
novel-m0077-5p	Dxb_GLEAN_10021401	-0.771429	Cntn3	Contactin-3 [Dicentrarchus labrax]
novel-m0081-3p	Dxb_GLEAN_10002861	-0.885714	PNMA2	zinc finger CCHC domain-containing 12-like protein [Labeo rohita]
novel-m0081-3p	Dxb_GLEAN_10007110	-0.880406	COL9A1	PREDICTED: collagen alpha-3(IX) chain-like [Paralichthys olivaceus]
novel-m0081-3p	Dxb_GLEAN_10009255	-0.942857	Sdccag8	serologically defined colon cancer antigen 8 isoform X2 [Cottoperca gobio]
novel-m0081-3p	Dxb_GLEAN_10010300	-0.828571	--	NK-lysin [Hyporthodus septemfasciatus]
novel-m0081-3p	Dxb_GLEAN_10010312	-0.758971	IMPG1	interphotoreceptor matrix proteoglycan 1-like isoform X4 [Seriola lalandi dorsalis]
novel-m0081-3p	Dxb_GLEAN_10015109	-0.714286	HS3ST1	heparan sulfate glucosamine 3-O-sulfotransferase 1 [Sparus aurata]
novel-m0081-3p	Dxb_GLEAN_10019484	-0.771429	Sp6	Transcription factor [Collichthys lucidus]
novel-m0081-3p	Dxb_GLEAN_10023095	-1	SALL1	PREDICTED: sal-like protein 1 [Lates calcarifer]
novel-m0091-3p	Dxb_GLEAN_10003962	-0.714286	PARP11	PREDICTED: poly [ADP-ribose] polymerase 11-like [Notothenia coriiceps]
novel-m0091-3p	Dxb_GLEAN_10006446	-0.942857	Mr1	MHC class I antigen, partial [Dicentrarchus labrax]
novel-m0091-3p	Dxb_GLEAN_10011512	-0.885714	--	bromodomain-containing protein DDB_G0270170-like [Seriola lalandi dorsalis]
novel-m0091-3p	Dxb_GLEAN_10011901	-0.942857	XCR1	chemokine XC receptor 1-like [Sander lucioperca]
novel-m0091-3p	Dxb_GLEAN_10012708	-0.771429	--	pro-neuregulin-4, membrane-bound isoform [Cottoperca gobio]
novel-m0091-3p	Dxb_GLEAN_10016931	-0.942857	C1S	LOW QUALITY PROTEIN: mannan-binding lectin serine protease 2-like [Cottoperca gobio]
novel-m0095-3p	Dxb_GLEAN_10000877	-0.771429	H4-I	Histone H4 [Larimichthys crocea]
novel-m0095-3p	Dxb_GLEAN_10001043	-0.714286	--	immune-associated nucleotide-binding protein 12-like [Perca flavescens]
novel-m0095-3p	Dxb_GLEAN_10001901	-0.885714	--	transmembrane protein 53-like isoform X3 [Perca flavescens]
novel-m0095-3p	Dxb_GLEAN_10002350	-0.771429	--	TYRO protein tyrosine kinase-binding protein [Larimichthys crocea]
novel-m0095-3p	Dxb_GLEAN_10002645	-0.771429	Btn2a2	stonustoxin subunit beta-like [Etheostoma spectabile]
novel-m0095-3p	Dxb_GLEAN_10002875	-0.714286	Btn1a1	Neoverrucotoxin subunit beta [Collichthys lucidus]
novel-m0095-3p	Dxb_GLEAN_10003424	-0.771429	tyrp1	5,6-dihydroxyindole-2-carboxylic acid oxidase [Seriola dumerili]
novel-m0095-3p	Dxb_GLEAN_10003436	-0.828571	dctn6	Dynactin subunit 6 [Collichthys lucidus]
novel-m0095-3p	Dxb_GLEAN_10004503	-0.885714	zic4	zinc finger protein ZIC 4-like isoform X2 [Acanthochromis polyacanthus]
novel-m0095-3p	Dxb_GLEAN_10005539	-0.771429	GRK5	G protein-coupled receptor kinase 5-like isoform X2 [Sparus aurata]
novel-m0095-3p	Dxb_GLEAN_10005988	-0.714286	Tecta	PREDICTED: LOW QUALITY PROTEIN: IgGFc-binding protein-like [Lates calcarifer]
novel-m0095-3p	Dxb_GLEAN_10007949	-0.771429	--	GATA zinc finger domain-containing protein 14-like [Anarrhichthys ocellatus]
novel-m0095-3p	Dxb_GLEAN_10008308	-0.885714	--	trichohyalin-like [Perca flavescens]
novel-m0095-3p	Dxb_GLEAN_10010317	-0.771429	Cmpk2	UMP-CMP kinase 2, mitochondrial [Sander lucioperca]
novel-m0095-3p	Dxb_GLEAN_10012708	-0.714286	--	pro-neuregulin-4, membrane-bound isoform [Cottoperca gobio]
novel-m0095-3p	Dxb_GLEAN_10013922	-0.714286	Ifih1	melanoma differentiation associated protein-5 [Epinephelus coioides]
novel-m0095-3p	Dxb_GLEAN_10014015	-0.714286	DCT	L-dopachrome tautomerase [Cottoperca gobio]
novel-m0095-3p	Dxb_GLEAN_10015515	-0.828571	BPI	lipopolysaccharide-binding protein-like [Cottoperca gobio]
novel-m0095-3p	Dxb_GLEAN_10015812	-0.714286	samhd1	deoxynucleoside triphosphate triphosphohydrolase SAMHD1-like [Sparus aurata]
novel-m0095-3p	Dxb_GLEAN_10016246	-0.828571	--	PREDICTED: mucin-5AC-like [Lates calcarifer]
novel-m0095-3p	Dxb_GLEAN_10016952	-0.828571	CLCN1	chloride channel protein 1 [Parambassis ranga]
novel-m0095-3p	Dxb_GLEAN_10017419	-0.714286	HMGCR	3-hydroxy-3-methylglutaryl-CoA reductase [Epinephelus lanceolatus]
novel-m0095-3p	Dxb_GLEAN_10018388	-0.828571	--	L-amino-acid oxidase-like isoform X2 [Sander lucioperca]
novel-m0095-3p	Dxb_GLEAN_10019798	-0.771429	--	pyrin-like [Perca flavescens]
novel-m0095-3p	Dxb_GLEAN_10020133	-0.771429	tyrp1	5,6-dihydroxyindole-2-carboxylic acid oxidase-like isoform X1 [Parambassis ranga]
novel-m0101-5p	Dxb_GLEAN_10003172	-0.941124	plcd4	1-phosphatidylinositol 4,5-bisphosphate phosphodiesterase delta-4 isoform X1 [Mastacembelus armatus]
novel-m0101-5p	Dxb_GLEAN_10004401	-0.885714	--	TNFAIP3-interacting protein 1-like [Larimichthys crocea]
novel-m0101-5p	Dxb_GLEAN_10006401	-0.771429	RTase	Carnitine O-palmitoyltransferase 2, mitochondrial [Takifugu flavidus]
novel-m0101-5p	Dxb_GLEAN_10008590	-0.771429	--	leucine-rich repeat-containing protein 74A-like [Perca flavescens]
novel-m0101-5p	Dxb_GLEAN_10009904	-0.942857	PRKD1	serine/threonine-protein kinase D1-like [Acanthochromis polyacanthus]
novel-m0101-5p	Dxb_GLEAN_10010149	-0.714286	NCEH1	neutral cholesterol ester hydrolase 1-like [Sander lucioperca]
novel-m0101-5p	Dxb_GLEAN_10011548	-0.771429	--	golgin subfamily A member 4-like isoform X2 [Cottoperca gobio]
novel-m0101-5p	Dxb_GLEAN_10012520	-0.771429	PAPPA2	pappalysin-2 [Perca flavescens]
novel-m0101-5p	Dxb_GLEAN_10018701	-0.771429	--	aryl-hydrocarbon-interacting -like 1 [Labeo rohita]
novel-m0101-5p	Dxb_GLEAN_10018815	-0.771429	FOSB	protein fosB isoform X1 [Seriola dumerili]
novel-m0101-5p	Dxb_GLEAN_10019561	-0.771429	FABP2	Fatty acid-binding protein [Channa argus]
novel-m0118-3p	Dxb_GLEAN_10009942	-0.880406	Ky	kyphoscoliosis peptidase [Sander lucioperca]
novel-m0118-3p	Dxb_GLEAN_10013922	-0.758971	Ifih1	melanoma differentiation associated protein-5 [Epinephelus coioides]
novel-m0118-3p	Dxb_GLEAN_10015796	-0.880406	TLR7	Toll-like receptor 9A [Epinephelus lanceolatus]
novel-m0120-5p	Dxb_GLEAN_10005539	-0.771429	GRK5	G protein-coupled receptor kinase 5-like isoform X2 [Sparus aurata]
novel-m0120-5p	Dxb_GLEAN_10005988	-0.828571	Tecta	PREDICTED: LOW QUALITY PROTEIN: IgGFc-binding protein-like [Lates calcarifer]
novel-m0120-5p	Dxb_GLEAN_10005989	-0.942857	Tecta	PREDICTED: LOW QUALITY PROTEIN: IgGFc-binding protein-like [Lates calcarifer]
novel-m0120-5p	Dxb_GLEAN_10007588	-0.771429	mreg	melanoregulin-like [Larimichthys crocea]
novel-m0120-5p	Dxb_GLEAN_10011350	-0.840668	amer2	APC membrane recruitment protein 2-like [Takifugu rubripes]
novel-m0120-5p	Dxb_GLEAN_10012750	-0.753702	HEXA	beta-hexosaminidase subunit alpha-like isoform X1 [Sander lucioperca]
novel-m0120-5p	Dxb_GLEAN_10015515	-0.714286	BPI	lipopolysaccharide-binding protein-like [Cottoperca gobio]
novel-m0120-5p	Dxb_GLEAN_10015812	-0.828571	samhd1	deoxynucleoside triphosphate triphosphohydrolase SAMHD1-like [Sparus aurata]
novel-m0121-3p	Dxb_GLEAN_10005539	-0.771429	GRK5	G protein-coupled receptor kinase 5-like isoform X2 [Sparus aurata]
novel-m0121-3p	Dxb_GLEAN_10005988	-0.828571	Tecta	PREDICTED: LOW QUALITY PROTEIN: IgGFc-binding protein-like [Lates calcarifer]
novel-m0121-3p	Dxb_GLEAN_10005989	-0.942857	Tecta	PREDICTED: LOW QUALITY PROTEIN: IgGFc-binding protein-like [Lates calcarifer]
novel-m0121-3p	Dxb_GLEAN_10007588	-0.771429	mreg	melanoregulin-like [Larimichthys crocea]
novel-m0121-3p	Dxb_GLEAN_10011350	-0.840668	amer2	APC membrane recruitment protein 2-like [Takifugu rubripes]
novel-m0121-3p	Dxb_GLEAN_10012750	-0.753702	HEXA	beta-hexosaminidase subunit alpha-like isoform X1 [Sander lucioperca]
novel-m0121-3p	Dxb_GLEAN_10015515	-0.714286	BPI	lipopolysaccharide-binding protein-like [Cottoperca gobio]
novel-m0121-3p	Dxb_GLEAN_10015812	-0.828571	samhd1	deoxynucleoside triphosphate triphosphohydrolase SAMHD1-like [Sparus aurata]
novel-m0146-5p	Dxb_GLEAN_10001043	-0.758971	--	immune-associated nucleotide-binding protein 12-like [Perca flavescens]
novel-m0146-5p	Dxb_GLEAN_10001726	-0.941124	Trim16	tripartite motif-containing protein 16-like [Larimichthys crocea]
novel-m0146-5p	Dxb_GLEAN_10002491	-0.880406	--	immune-associated nucleotide-binding protein 12-like [Perca flavescens]
novel-m0146-5p	Dxb_GLEAN_10004503	-0.758971	zic4	zinc finger protein ZIC 4-like isoform X2 [Acanthochromis polyacanthus]
novel-m0146-5p	Dxb_GLEAN_10005468	-0.941124	ANXA1	annexin A1-like [Seriola dumerili]
novel-m0146-5p	Dxb_GLEAN_10005539	-0.880406	GRK5	G protein-coupled receptor kinase 5-like isoform X2 [Sparus aurata]
novel-m0146-5p	Dxb_GLEAN_10005865	-0.941124	Adam9	disintegrin and metalloproteinase domain-containing protein 9-like isoform X1 [Sander lucioperca]
novel-m0146-5p	Dxb_GLEAN_10006032	-0.880406	PRSS36	transmembrane protease serine 9-like isoform X1 [Betta splendens]
novel-m0146-5p	Dxb_GLEAN_10007951	-0.880406	--	uncharacterized LOC103392932 precursor [Cynoglossus semilaevis]
novel-m0146-5p	Dxb_GLEAN_10009262	-0.758971	SULT3A1	amine sulfotransferase-like [Cottoperca gobio]
novel-m0146-5p	Dxb_GLEAN_10009922	-0.941124	MIMI_R795	Ubiquitin-conjugating enzyme E2 E2 [Channa argus]
novel-m0146-5p	Dxb_GLEAN_10011044	-0.941124	Trim11	tripartite motif-containing protein 16 [Larimichthys crocea]
novel-m0146-5p	Dxb_GLEAN_10012229	-0.758971	TIMM44	mitochondrial import inner membrane translocase subunit TIM44-like isoform X2 [Anarrhichthys ocellatus]
novel-m0146-5p	Dxb_GLEAN_10012238	-0.941124	RAB3A	ras-related protein Rab-3A-like [Anabas testudineus]
novel-m0146-5p	Dxb_GLEAN_10012940	-0.880406	--	SLAM family member 9 [Perca flavescens]
novel-m0146-5p	Dxb_GLEAN_10016237	-0.758971	RAB29	ras-related protein Rab-7L1-like [Anarrhichthys ocellatus]
novel-m0146-5p	Dxb_GLEAN_10017425	-0.941124	marveld2	MARVEL domain-containing protein 2-like [Etheostoma spectabile]
novel-m0146-5p	Dxb_GLEAN_10017861	-0.880406	CMKLR1	chemokine-like receptor 1 [Amphiprion ocellaris]
novel-m0146-5p	Dxb_GLEAN_10018388	-0.880406	--	L-amino-acid oxidase-like isoform X2 [Sander lucioperca]
novel-m0146-5p	Dxb_GLEAN_10018403	-0.758971	A2m	alpha-2-macroglobulin-like [Sander lucioperca]
novel-m0146-5p	Dxb_GLEAN_10018532	-0.880406	mmp13	collagenase 3-like [Sander lucioperca]
novel-m0146-5p	Dxb_GLEAN_10020618	-0.880406	ARRDC2	arrestin domain-containing protein 2 isoform X2 [Larimichthys crocea]
novel-m0146-5p	Dxb_GLEAN_10020699	-0.941124	--	receptor-transporting protein 3-like [Perca flavescens]
novel-m0146-5p	Dxb_GLEAN_10021167	-0.880406	Oca2	PREDICTED: P protein [Paralichthys olivaceus]
novel-m0146-5p	Dxb_GLEAN_10022278	-0.880406	Fer1l4	fer-1-like protein 4 [Sander lucioperca]
novel-m0151-5p	Dxb_GLEAN_10002676	-0.885714	--	myelin-oligodendrocyte glycoprotein-like [Anarrhichthys ocellatus]
novel-m0151-5p	Dxb_GLEAN_10004830	-0.828571	RTase	Carnitine O-palmitoyltransferase 2, mitochondrial [Takifugu flavidus]
novel-m0151-5p	Dxb_GLEAN_10007110	-0.880406	COL9A1	PREDICTED: collagen alpha-3(IX) chain-like [Paralichthys olivaceus]
novel-m0151-5p	Dxb_GLEAN_10007821	-0.714286	SOCS3	suppressor of cytokine signaling 3, partial [Siniperca chuatsi]
novel-m0151-5p	Dxb_GLEAN_10008124	-0.942857	CBX7	LOW QUALITY PROTEIN: chromobox protein homolog 7-like [Cottoperca gobio]
novel-m0151-5p	Dxb_GLEAN_10012343	-0.885714	RGS13	regulator of G-protein signaling 21-like [Sander lucioperca]
novel-m0151-5p	Dxb_GLEAN_10012550	-0.840668	--	proteoglycan 4-like [Sander lucioperca]
novel-m0151-5p	Dxb_GLEAN_10013067	-1	AMPD3	AMP deaminase 3-like isoform X1 [Seriola lalandi dorsalis]
novel-m0151-5p	Dxb_GLEAN_10015000	-0.771429	Fosl1	fos-related antigen 1 [Anabas testudineus]
novel-m0151-5p	Dxb_GLEAN_10016658	-0.885714	NFKBID	NF-kappa-B inhibitor delta I-kappa-B-delta [Collichthys lucidus]
novel-m0151-5p	Dxb_GLEAN_10017945	-0.771429	Kif27	kinesin-like protein KIF27 [Sander lucioperca]
novel-m0151-5p	Dxb_GLEAN_10019561	-0.885714	FABP2	Fatty acid-binding protein [Channa argus]
novel-m0151-5p	Dxb_GLEAN_10021506	-0.885714	nr4a1	Nuclear receptor subfamily 4 group A member 1 [Collichthys lucidus]
novel-m0152-5p	Dxb_GLEAN_10002676	-0.885714	--	myelin-oligodendrocyte glycoprotein-like [Anarrhichthys ocellatus]
novel-m0152-5p	Dxb_GLEAN_10004830	-0.828571	RTase	Carnitine O-palmitoyltransferase 2, mitochondrial [Takifugu flavidus]
novel-m0152-5p	Dxb_GLEAN_10007110	-0.880406	COL9A1	PREDICTED: collagen alpha-3(IX) chain-like [Paralichthys olivaceus]
novel-m0152-5p	Dxb_GLEAN_10007821	-0.714286	SOCS3	suppressor of cytokine signaling 3, partial [Siniperca chuatsi]
novel-m0152-5p	Dxb_GLEAN_10008124	-0.942857	CBX7	LOW QUALITY PROTEIN: chromobox protein homolog 7-like [Cottoperca gobio]
novel-m0152-5p	Dxb_GLEAN_10012343	-0.885714	RGS13	regulator of G-protein signaling 21-like [Sander lucioperca]
novel-m0152-5p	Dxb_GLEAN_10012550	-0.840668	--	proteoglycan 4-like [Sander lucioperca]
novel-m0152-5p	Dxb_GLEAN_10013067	-1	AMPD3	AMP deaminase 3-like isoform X1 [Seriola lalandi dorsalis]
novel-m0152-5p	Dxb_GLEAN_10015000	-0.771429	Fosl1	fos-related antigen 1 [Anabas testudineus]
novel-m0152-5p	Dxb_GLEAN_10016658	-0.885714	NFKBID	NF-kappa-B inhibitor delta I-kappa-B-delta [Collichthys lucidus]
novel-m0152-5p	Dxb_GLEAN_10017945	-0.771429	Kif27	kinesin-like protein KIF27 [Sander lucioperca]
novel-m0152-5p	Dxb_GLEAN_10019561	-0.885714	FABP2	Fatty acid-binding protein [Channa argus]
novel-m0152-5p	Dxb_GLEAN_10021506	-0.885714	nr4a1	Nuclear receptor subfamily 4 group A member 1 [Collichthys lucidus]
novel-m0181-3p	Dxb_GLEAN_10001916	-0.724714	FCGBP	Alpha-tectorin [Dicentrarchus labrax]
novel-m0181-3p	Dxb_GLEAN_10005882	-0.927634	ddit4	DNA damage-inducible transcript 4 protein [Perca flavescens]
novel-m0181-3p	Dxb_GLEAN_10007950	-0.724714	--	uncharacterized LOC103392932 precursor [Cynoglossus semilaevis]
novel-m0181-3p	Dxb_GLEAN_10008100	-0.794118	iaaA	Isoaspartyl peptidase [Liparis tanakae]
novel-m0181-3p	Dxb_GLEAN_10008635	-0.898645	FAM110C	protein FAM110C [Sander lucioperca]
novel-m0181-3p	Dxb_GLEAN_10009825	-0.927634	SLC2A9	PREDICTED: solute carrier family 2, facilitated glucose transporter member 9-like [Lates calcarifer]
novel-m0181-3p	Dxb_GLEAN_10011186	-0.840668	CLDN4	claudin-4-like [Seriola lalandi dorsalis]
novel-m0181-3p	Dxb_GLEAN_10011979	-0.724714	Dtna	dystrobrevin alpha isoform X2 [Seriola lalandi dorsalis]
novel-m0181-3p	Dxb_GLEAN_10012750	-0.705882	HEXA	beta-hexosaminidase subunit alpha-like isoform X1 [Sander lucioperca]
novel-m0181-3p	Dxb_GLEAN_10013816	-0.724714	CLDN14	PREDICTED: claudin-14 [Lates calcarifer]
novel-m0181-3p	Dxb_GLEAN_10013922	-0.724714	Ifih1	melanoma differentiation associated protein-5 [Epinephelus coioides]
novel-m0181-3p	Dxb_GLEAN_10014954	-0.811679	SLC5A7	PREDICTED: high-affinity choline transporter 1-like isoform X1 [Lates calcarifer]
novel-m0181-3p	Dxb_GLEAN_10015654	-0.840668	KIAA1324	UPF0577 protein KIAA1324 homolog isoform X1 [Perca flavescens]
novel-m0181-3p	Dxb_GLEAN_10016017	-0.927634	CHIT1	Chitinase-3-like protein 1 [Scophthalmus maximus]
novel-m0181-3p	Dxb_GLEAN_10018559	-0.898645	--	complement C1q and tumor necrosis factor-related protein 9 [Larimichthys crocea]
novel-m0181-3p	Dxb_GLEAN_10022390	-0.753702	Trim39	nuclear factor 7, ovary-like [Seriola dumerili]
novel-m0189-5p	Dxb_GLEAN_10000490	-0.942857	hba2	hemoglobin embryonic subunit alpha-like [Anabas testudineus]
novel-m0189-5p	Dxb_GLEAN_10002425	-0.927634	USP43	PREDICTED: ubiquitin carboxyl-terminal hydrolase 43-like isoform X1 [Lates calcarifer]
novel-m0189-5p	Dxb_GLEAN_10004401	-0.771429	--	TNFAIP3-interacting protein 1-like [Larimichthys crocea]
novel-m0189-5p	Dxb_GLEAN_10004707	-0.771429	Myh6	myosin-6-like [Amphiprion ocellaris]
novel-m0189-5p	Dxb_GLEAN_10006400	-0.771429	RTase	Transposable element [Takifugu flavidus]
novel-m0189-5p	Dxb_GLEAN_10007025	-0.828571	FABP3	PREDICTED: fatty acid-binding protein, heart-like [Paralichthys olivaceus]
novel-m0189-5p	Dxb_GLEAN_10007632	-0.714286	CNTNAP1	contactin-associated protein 1 [Amphiprion ocellaris]
novel-m0189-5p	Dxb_GLEAN_10008124	-0.771429	CBX7	LOW QUALITY PROTEIN: chromobox protein homolog 7-like [Cottoperca gobio]
novel-m0189-5p	Dxb_GLEAN_10008187	-0.714286	Tgfbr3	transforming growth factor beta receptor type 3-like isoform X1 [Cottoperca gobio]
novel-m0189-5p	Dxb_GLEAN_10009440	-0.828571	--	arginine vasopressin-induced protein 1 isoform X1 [Anarrhichthys ocellatus]
novel-m0189-5p	Dxb_GLEAN_10014250	-0.714286	--	AN1-type zinc finger protein 2B-like, partial [Protobothrops mucrosquamatus]
novel-m0189-5p	Dxb_GLEAN_10015109	-0.771429	HS3ST1	heparan sulfate glucosamine 3-O-sulfotransferase 1 [Sparus aurata]
novel-m0189-5p	Dxb_GLEAN_10017485	-0.753702	SUSD1	PREDICTED: sushi domain-containing protein 1-like [Lates calcarifer]
novel-m0189-5p	Dxb_GLEAN_10018070	-0.714286	Dusp2	dual specificity protein phosphatase 2-like [Amphiprion ocellaris]
novel-m0189-5p	Dxb_GLEAN_10019561	-0.828571	FABP2	Fatty acid-binding protein [Channa argus]
novel-m0189-5p	Dxb_GLEAN_10021355	-0.771429	G0s2	G0/G1 switch protein 2-like [Sander lucioperca]
novel-m0189-5p	Dxb_GLEAN_10021506	-0.828571	nr4a1	Nuclear receptor subfamily 4 group A member 1 [Collichthys lucidus]
novel-m0189-5p	Dxb_GLEAN_10021525	-0.885714	Fmod	fibromodulin-like [Perca flavescens]
novel-m0189-5p	Dxb_GLEAN_10023261	-0.828571	pol	Retrovirus-related Pol polyprotein from transposon 17.6 [Collichthys lucidus]
novel-m0198-5p	Dxb_GLEAN_10002861	-0.845154	PNMA2	zinc finger CCHC domain-containing 12-like protein [Labeo rohita]
novel-m0198-5p	Dxb_GLEAN_10008715	-0.823193	SIM1	single-minded homolog 1-like [Sparus aurata]
novel-m0198-5p	Dxb_GLEAN_10017294	-0.771744	TG	thyroglobulin-like [Sparus aurata]
novel-m0199-3p	Dxb_GLEAN_10002861	-0.845154	PNMA2	zinc finger CCHC domain-containing 12-like protein [Labeo rohita]
novel-m0199-3p	Dxb_GLEAN_10008715	-0.823193	SIM1	single-minded homolog 1-like [Sparus aurata]
novel-m0199-3p	Dxb_GLEAN_10017294	-0.771744	TG	thyroglobulin-like [Sparus aurata]
novel-m0202-3p	Dxb_GLEAN_10002249	-0.811679	MFAP4	microfibril-associated glycoprotein 4-like isoform X2 [Astatotilapia calliptera]
novel-m0202-3p	Dxb_GLEAN_10002645	-0.753702	Btn2a2	stonustoxin subunit beta-like [Etheostoma spectabile]
novel-m0202-3p	Dxb_GLEAN_10003575	-0.927634	--	PREDICTED: GTPase IMAP family member 7-like [Notothenia coriiceps]
novel-m0202-3p	Dxb_GLEAN_10003645	-0.811679	--	PREDICTED: polyubiquitin-like [Neolamprologus brichardi]
novel-m0202-3p	Dxb_GLEAN_10003936	-0.811679	PARP11	E3 ubiquitin-protein ligase DTX1-like isoform X1 [Echeneis naucrates]
novel-m0202-3p	Dxb_GLEAN_10005865	-0.811679	Adam9	disintegrin and metalloproteinase domain-containing protein 9-like isoform X1 [Sander lucioperca]
novel-m0202-3p	Dxb_GLEAN_10007490	-0.898645	Mybpc2	myosin-binding protein C, fast-type isoform X1 [Anabas testudineus]
novel-m0202-3p	Dxb_GLEAN_10007588	-0.753702	mreg	melanoregulin-like [Larimichthys crocea]
novel-m0202-3p	Dxb_GLEAN_10008480	-0.811679	Rhov	rho-related GTP-binding protein RhoV [Cynoglossus semilaevis]
novel-m0202-3p	Dxb_GLEAN_10008635	-0.811679	FAM110C	protein FAM110C [Sander lucioperca]
novel-m0202-3p	Dxb_GLEAN_10009942	-0.927634	Ky	kyphoscoliosis peptidase [Sander lucioperca]
novel-m0202-3p	Dxb_GLEAN_10010317	-0.753702	Cmpk2	UMP-CMP kinase 2, mitochondrial [Sander lucioperca]
novel-m0202-3p	Dxb_GLEAN_10012393	-0.927634	GRINA	protein lifeguard 1-like [Anarrhichthys ocellatus]
novel-m0202-3p	Dxb_GLEAN_10013941	-0.811679	Rdh16	retinol dehydrogenase 7-like [Perca flavescens]
novel-m0202-3p	Dxb_GLEAN_10014030	-0.927634	Tlr8	TLR8 [Epinephelus coioides]
novel-m0202-3p	Dxb_GLEAN_10017301	-0.985611	METTL27	methyltransferase-like protein 27 [Maylandia zebra]
novel-m0202-3p	Dxb_GLEAN_10018028	-0.927634	Znf366	zinc finger protein 366-like [Cottoperca gobio]
novel-m0202-3p	Dxb_GLEAN_10018495	-0.753702	CD3D	T-cell surface glycoprotein CD3 gamma chain precursor [Anoplopoma fimbria]
novel-m0202-3p	Dxb_GLEAN_10018659	-0.811679	tyr	tyrosinase [Seriola lalandi dorsalis]
novel-m0202-3p	Dxb_GLEAN_10018719	-0.927634	AIFM3	apoptosis-inducing factor 3-like isoform X1 [Cottoperca gobio]
novel-m0202-3p	Dxb_GLEAN_10022254	-0.811679	KLHDC7A	kelch domain-containing protein 7A-like [Sander lucioperca]
novel-m0202-3p	Dxb_GLEAN_10022384	-0.840668	DNASE1	deoxyribonuclease-1-like [Anabas testudineus]
novel-m0218-5p	Dxb_GLEAN_10002861	-0.753702	PNMA2	zinc finger CCHC domain-containing 12-like protein [Labeo rohita]
novel-m0218-5p	Dxb_GLEAN_10005129	-0.811679	Klf4	Krueppel-like factor 4 isoform X2 [Sander lucioperca]
novel-m0218-5p	Dxb_GLEAN_10006821	-0.724714	hoxa13a	homeobox protein Hox-A13 [Echeneis naucrates]
novel-m0218-5p	Dxb_GLEAN_10008323	-0.985611	cep170b	centrosomal protein of 170 kDa protein B-like isoform X3 [Acanthochromis polyacanthus]
novel-m0218-5p	Dxb_GLEAN_10008593	-0.811679	fos	proto-oncogene c-Fos [Larimichthys crocea]
novel-m0218-5p	Dxb_GLEAN_10011664	-0.985611	LAMC2	laminin subunit gamma-2-like [Sander lucioperca]
novel-m0218-5p	Dxb_GLEAN_10012029	-0.985611	Lama3	laminin subunit alpha-3 isoform X1 [Sander lucioperca]
novel-m0218-5p	Dxb_GLEAN_10017260	-0.811679	MCL1	induced myeloid leukemia cell differentiation protein Mcl-1 homolog [Perca flavescens]
novel-m0218-5p	Dxb_GLEAN_10021240	-0.840668	ttc39c	PREDICTED: tetratricopeptide repeat protein 39C [Lates calcarifer]
novel-m0254-5p	Dxb_GLEAN_10002614	-0.777542	--	mucin-2-like isoform X2 [Boleophthalmus pectinirostris]
novel-m0254-5p	Dxb_GLEAN_10007821	-0.845154	SOCS3	suppressor of cytokine signaling 3, partial [Siniperca chuatsi]
novel-m0254-5p	Dxb_GLEAN_10008568	-0.777542	Rp1l1	nucleoprotein TPR-like [Sparus aurata]
novel-m0254-5p	Dxb_GLEAN_10009946	-0.845154	foxi1c	forkhead box protein I1c-like [Sparus aurata]
novel-m0254-5p	Dxb_GLEAN_10010167	-0.845154	GADD45B	growth arrest and DNA damage-inducible protein GADD45 beta-like [Parambassis ranga]
novel-m0254-5p	Dxb_GLEAN_10010386	-0.777542	Asb2	ankyrin repeat and SOCS box protein 2-like isoform X3 [Sander lucioperca]
novel-m0254-5p	Dxb_GLEAN_10011976	-0.845154	Cebpd	CCAAT/enhancer-binding protein delta [Mastacembelus armatus]
novel-m0254-5p	Dxb_GLEAN_10012029	-0.845154	Lama3	laminin subunit alpha-3 isoform X1 [Sander lucioperca]
novel-m0254-5p	Dxb_GLEAN_10013943	-0.777542	LRP2	low-density lipoprotein receptor-related protein 2 isoform X1 [Perca flavescens]
novel-m0254-5p	Dxb_GLEAN_10014392	-0.777542	ARL4C	ADP-ribosylation factor-like protein 4C [Seriola dumerili]
novel-m0254-5p	Dxb_GLEAN_10014405	-0.777542	Enox1	PREDICTED: ecto-NOX disulfide-thiol exchanger 1 isoform X4 [Lepisosteus oculatus]
novel-m0254-5p	Dxb_GLEAN_10014897	-0.777542	--	BTB/POZ domain-containing protein 18 isoform X3 [Sander lucioperca]
novel-m0254-5p	Dxb_GLEAN_10017683	-0.777542	NEURL3	E3 ubiquitin-protein ligase NEURL3-like [Cottoperca gobio]
novel-m0254-5p	Dxb_GLEAN_10017883	-0.788893	Ank1	ankyrin-1 isoform X5 [Amphiprion ocellaris]
novel-m0254-5p	Dxb_GLEAN_10019484	-0.845154	Sp6	Transcription factor [Collichthys lucidus]
novel-m0254-5p	Dxb_GLEAN_10020238	-0.777542	Cxcl2	interleukin-8 [Epinephelus coioides]
novel-m0254-5p	Dxb_GLEAN_10020267	-0.845154	Noct	nocturnin-like isoform X2 [Sander lucioperca]
novel-m0254-5p	Dxb_GLEAN_10020578	-0.777542	PTGS2	PREDICTED: prostaglandin G/H synthase 2 [Lates calcarifer]
novel-m0273-3p	Dxb_GLEAN_10008662	-0.845154	Aloxe3	hydroperoxide isomerase ALOXE3 [Larimichthys crocea]
novel-m0273-3p	Dxb_GLEAN_10010300	-0.845154	--	NK-lysin [Hyporthodus septemfasciatus]
novel-m0273-3p	Dxb_GLEAN_10014829	-0.845154	--	PREDICTED: osmotic avoidance abnormal protein 3-like isoform X1 [Notothenia coriiceps]
novel-m0273-3p	Dxb_GLEAN_10016658	-0.845154	NFKBID	NF-kappa-B inhibitor delta I-kappa-B-delta [Collichthys lucidus]
novel-m0273-3p	Dxb_GLEAN_10017870	-0.777542	EMID1	EMI domain-containing protein 1 isoform X3 [Larimichthys crocea]
novel-m0273-3p	Dxb_GLEAN_10018701	-0.777542	--	aryl-hydrocarbon-interacting -like 1 [Labeo rohita]
novel-m0273-3p	Dxb_GLEAN_10019561	-0.845154	FABP2	Fatty acid-binding protein [Channa argus]
novel-m0273-3p	Dxb_GLEAN_10021355	-0.777542	G0s2	G0/G1 switch protein 2-like [Sander lucioperca]
novel-m0313-3p	Dxb_GLEAN_10002425	-0.831655	USP43	PREDICTED: ubiquitin carboxyl-terminal hydrolase 43-like isoform X1 [Lates calcarifer]
novel-m0313-3p	Dxb_GLEAN_10006401	-0.758971	RTase	Carnitine O-palmitoyltransferase 2, mitochondrial [Takifugu flavidus]
novel-m0313-3p	Dxb_GLEAN_10007025	-0.880406	FABP3	PREDICTED: fatty acid-binding protein, heart-like [Paralichthys olivaceus]
novel-m0313-3p	Dxb_GLEAN_10008715	-0.739249	SIM1	single-minded homolog 1-like [Sparus aurata]
novel-m0313-3p	Dxb_GLEAN_10009159	-0.880406	sult6b1	Sulfotransferase 6B1 [Channa argus]
novel-m0313-3p	Dxb_GLEAN_10012150	-0.941124	FAM102B	LOW QUALITY PROTEIN: protein FAM102B-like [Cottoperca gobio]
novel-m0313-3p	Dxb_GLEAN_10013547	-0.870968	ANPEP	aminopeptidase N-like [Anarrhichthys ocellatus]
novel-m0313-3p	Dxb_GLEAN_10016085	-0.880406	--	CCAAT/enhancer-binding protein beta-like [Acanthochromis polyacanthus]
novel-m0313-3p	Dxb_GLEAN_10016177	-0.880406	Camk1g	calcium/calmodulin-dependent protein kinase type 1D-like [Seriola dumerili]
novel-m0313-3p	Dxb_GLEAN_10017945	-0.758971	Kif27	kinesin-like protein KIF27 [Sander lucioperca]
novel-m0313-3p	Dxb_GLEAN_10018136	-0.758971	--	epigen, partial [Epinephelus bruneus]
novel-m0313-3p	Dxb_GLEAN_10019067	-0.924062	B3GNT2	UDP-GlcNAc:betaGal beta-1,3-N-acetylglucosaminyltransferase 8 [Sparus aurata]
novel-m0313-3p	Dxb_GLEAN_10022275	-0.880406	TRIB2	tribbles homolog 3-like [Sander lucioperca]
novel-m0342-5p	Dxb_GLEAN_10001241	-0.758971	cyp2k4	cytochrome P450 2K1-like [Parambassis ranga]
novel-m0342-5p	Dxb_GLEAN_10004205	-0.941124	nxpe3	NXPE family member 3-like [Perca flavescens]
novel-m0342-5p	Dxb_GLEAN_10004207	-0.758971	ST8SIA6	PREDICTED: alpha-2,8-sialyltransferase 8E-like [Notothenia coriiceps]
novel-m0342-5p	Dxb_GLEAN_10005882	-0.880406	ddit4	DNA damage-inducible transcript 4 protein [Perca flavescens]
novel-m0342-5p	Dxb_GLEAN_10007115	-0.880406	ST3GAL1	CMP-N-acetylneuraminate-beta-galactosamide-alpha-2,3-sialyltransferase 1-like [Mastacembelus armatus]
novel-m0342-5p	Dxb_GLEAN_10007950	-0.758971	--	uncharacterized LOC103392932 precursor [Cynoglossus semilaevis]
novel-m0342-5p	Dxb_GLEAN_10008308	-0.758971	--	trichohyalin-like [Perca flavescens]
novel-m0342-5p	Dxb_GLEAN_10009942	-0.880406	Ky	kyphoscoliosis peptidase [Sander lucioperca]
novel-m0342-5p	Dxb_GLEAN_10011186	-0.880406	CLDN4	claudin-4-like [Seriola lalandi dorsalis]
novel-m0342-5p	Dxb_GLEAN_10011901	-0.880406	XCR1	chemokine XC receptor 1-like [Sander lucioperca]
novel-m0342-5p	Dxb_GLEAN_10011979	-0.941124	Dtna	dystrobrevin alpha isoform X2 [Seriola lalandi dorsalis]
novel-m0342-5p	Dxb_GLEAN_10012778	-0.941124	TRIM27	zinc-binding protein A33-like [Sander lucioperca]
novel-m0342-5p	Dxb_GLEAN_10013214	-0.880406	SLC23A1	solute carrier family 23 member 1-like [Seriola lalandi dorsalis]
novel-m0342-5p	Dxb_GLEAN_10014030	-0.880406	Tlr8	TLR8 [Epinephelus coioides]
novel-m0342-5p	Dxb_GLEAN_10018719	-0.880406	AIFM3	apoptosis-inducing factor 3-like isoform X1 [Cottoperca gobio]
novel-m0342-5p	Dxb_GLEAN_10021167	-0.880406	Oca2	PREDICTED: P protein [Paralichthys olivaceus]

## Sheet: Supplemental table 5
Supplemental table 5 Integrated analysis of DEMs and DELs
miRNA	lncRNA	rho
miR-100-y	MSTRG.19916.1	-0.885714
miR-122-x	MSTRG.13340.1	-0.885714
miR-122-x	MSTRG.6280.1	-0.714286
miR-1271-x	MSTRG.30354.4	-0.771429
miR-152-x	MSTRG.1567.1	-0.777542
miR-152-x	MSTRG.19916.1	-0.777542
miR-152-x	MSTRG.30354.4	-0.845154
miR-1839-x	MSTRG.16556.1	-0.942857
miR-1839-x	MSTRG.17875.1	-0.771429
miR-1839-x	MSTRG.25342.1	-0.714286
miR-187-x	MSTRG.102.1	-0.828571
miR-187-x	MSTRG.1252.1	-0.771429
miR-187-x	MSTRG.6039.1	-0.714286
miR-192-x	MSTRG.183.1	-0.753702
miR-192-x	MSTRG.2491.1	-0.885714
miR-192-z	MSTRG.13340.1	-0.771429
miR-192-z	MSTRG.1567.1	-0.885714
miR-192-z	MSTRG.16694.1	-0.714286
miR-192-z	MSTRG.183.1	-0.753702
miR-194-x	MSTRG.3042.1	-0.771429
miR-196-z	MSTRG.18627.1	-0.898645
miR-215-x	MSTRG.183.1	-0.954864
miR-215-x	MSTRG.2491.1	-0.758971
miR-215-z	MSTRG.2491.1	-0.758971
miR-2188-x	MSTRG.1567.1	-0.942857
miR-2188-x	MSTRG.6280.1	-0.828571
miR-2188-x	MSTRG.7698.1	-0.811679
miR-339-x	MSTRG.22093.3	-0.714286
miR-3549-z	MSTRG.20021.2	-0.771429
miR-3549-z	MSTRG.24170.2	-0.724714
miR-3549-z	MSTRG.24775.3	-0.714286
miR-3549-z	MSTRG.26107.1	-0.771429
miR-466-x	MSTRG.12272.1	-0.885714
miR-466-x	MSTRG.13340.1	-0.771429
miR-466-x	MSTRG.13385.1	-0.828571
miR-466-x	MSTRG.16640.2	-0.885714
miR-466-x	MSTRG.16756.1	-0.942857
miR-466-x	MSTRG.17514.1	-0.771429
miR-466-x	MSTRG.183.1	-0.811679
miR-466-x	MSTRG.18627.1	-0.811679
miR-466-x	MSTRG.19046.1	-0.771429
miR-466-x	MSTRG.22133.4	-0.771429
miR-466-x	MSTRG.24705.2	-0.880406
miR-466-x	MSTRG.26906.1	-0.828571
miR-466-x	MSTRG.30138.1	-0.771429
miR-589-x	MSTRG.18932.1	-0.714286
miR-625-x	MSTRG.20528.1	-0.758971
miR-735-x	MSTRG.1567.1	-0.771429
miR-735-x	MSTRG.17033.1	-1
miR-8159-x	MSTRG.15030.1	-0.714286
miR-8159-x	MSTRG.1567.1	-0.885714
miR-8159-x	MSTRG.20052.1	-0.771429
miR-873-x	MSTRG.17969.1	-0.811679
novel-m0015-3p	MSTRG.19046.1	-0.828571
novel-m0015-3p	MSTRG.20826.2	-0.771429
novel-m0015-3p	MSTRG.25342.1	-0.828571
novel-m0015-3p	MSTRG.4981.2	-0.771429
novel-m0019-5p	MSTRG.719.1	-1
novel-m0020-5p	MSTRG.719.1	-1
novel-m0040-3p	MSTRG.13385.1	-0.771429
novel-m0040-3p	MSTRG.1567.1	-0.771429
novel-m0040-3p	MSTRG.21024.1	-0.828571
novel-m0040-3p	MSTRG.30033.1	-0.828571
novel-m0051-3p	MSTRG.102.1	-0.828571
novel-m0051-3p	MSTRG.14315.1	-0.771429
novel-m0051-3p	MSTRG.15830.3	-0.771429
novel-m0051-3p	MSTRG.18403.1	-0.811679
novel-m0051-3p	MSTRG.1993.3	-0.714286
novel-m0051-3p	MSTRG.21720.1	-0.885714
novel-m0051-3p	MSTRG.7556.4	-0.714286
novel-m0051-3p	MSTRG.8593.2	-0.771429
novel-m0051-3p	MSTRG.9225.1	-0.885714
novel-m0077-5p	MSTRG.102.1	-0.714286
novel-m0077-5p	MSTRG.17068.1	-0.828571
novel-m0077-5p	MSTRG.24608.3	-0.811679
novel-m0077-5p	MSTRG.29484.2	-0.758971
novel-m0081-3p	MSTRG.20021.2	-0.828571
novel-m0081-3p	MSTRG.24775.3	-0.942857
novel-m0081-3p	MSTRG.26107.1	-1
novel-m0091-3p	MSTRG.20528.1	-0.885714
novel-m0095-3p	MSTRG.13340.1	-0.714286
novel-m0095-3p	MSTRG.18932.1	-0.714286
novel-m0095-3p	MSTRG.25514.1	-0.771429
novel-m0120-5p	MSTRG.20528.1	-0.771429
novel-m0121-3p	MSTRG.20528.1	-0.771429
novel-m0146-5p	MSTRG.13340.1	-0.758971
novel-m0146-5p	MSTRG.16756.1	-0.880406
novel-m0146-5p	MSTRG.183.1	-0.708447
novel-m0146-5p	MSTRG.22093.3	-0.941124
novel-m0151-5p	MSTRG.24133.1	-0.885714
novel-m0151-5p	MSTRG.6039.1	-0.771429
novel-m0151-5p	MSTRG.7556.4	-1
novel-m0152-5p	MSTRG.24133.1	-0.885714
novel-m0152-5p	MSTRG.6039.1	-0.771429
novel-m0152-5p	MSTRG.7556.4	-1
novel-m0181-3p	MSTRG.13340.1	-0.898645
novel-m0181-3p	MSTRG.183.1	-0.897059
novel-m0181-3p	MSTRG.26249.1	-0.985611
novel-m0189-5p	MSTRG.14315.1	-0.771429
novel-m0189-5p	MSTRG.1799.1	-0.771429
novel-m0189-5p	MSTRG.7556.4	-0.885714
novel-m0198-5p	MSTRG.4743.1	-0.845154
novel-m0198-5p	MSTRG.6039.1	-0.845154
novel-m0199-3p	MSTRG.4743.1	-0.845154
novel-m0199-3p	MSTRG.6039.1	-0.845154
novel-m0202-3p	MSTRG.16756.1	-0.840668
novel-m0202-3p	MSTRG.183.1	-0.897059
novel-m0202-3p	MSTRG.18627.1	-0.882353
novel-m0218-5p	MSTRG.12888.1	-0.927634
novel-m0218-5p	MSTRG.19785.1	-0.924062
novel-m0218-5p	MSTRG.1993.3	-0.927634
novel-m0218-5p	MSTRG.3046.1	-0.794118
novel-m0254-5p	MSTRG.5116.1	-0.777542
novel-m0254-5p	MSTRG.6039.1	-0.777542
novel-m0254-5p	MSTRG.6291.1	-0.777542
novel-m0254-5p	MSTRG.8551.1	-0.777542
novel-m0254-5p	MSTRG.8593.3	-0.777542
novel-m0273-3p	MSTRG.102.1	-0.845154
novel-m0273-3p	MSTRG.12888.1	-0.777542
novel-m0273-3p	MSTRG.16429.1	-0.777542
novel-m0273-3p	MSTRG.16429.3	-0.777542
novel-m0313-3p	MSTRG.1993.3	-0.758971
novel-m0313-3p	MSTRG.9225.1	-0.758971
novel-m0342-5p	MSTRG.2242.1	-0.880406
novel-m0342-5p	MSTRG.30033.1	-0.941124

## Sheet: Supplemental table 6
Supplemental table 6 ceRNA network
ncRNA_ID	mRNA_ID	corr	miRNA_NUM(ncRNA)	miRNA_NUM(mRNA)	miRNA_NUM(both)(52)	miRNA_ID(both)	hyper.test.p	Symbol	Description
MSTRG.102.1	Dxb_GLEAN_10002676	0.993558	4	4	2	novel-m0051-3p|novel-m0077-5p	0.0257124	--	myelin-oligodendrocyte glycoprotein-like [Anarrhichthys ocellatus]
MSTRG.102.1	Dxb_GLEAN_10003947	0.912259	4	2	2	miR-187-x|novel-m0051-3p	0.00452489	Prrt4	proline-rich transmembrane protein 4 [Perca flavescens]
MSTRG.102.1	Dxb_GLEAN_10010815	0.988419	4	2	2	miR-187-x|novel-m0051-3p	0.00452489	EGR1	early growth response protein 1-like [Seriola dumerili]
MSTRG.12272.1	Dxb_GLEAN_10001168	0.913266	1	1	1	miR-466-x	0.0192308	Gimap9	GTPase IMAP family member 9-like isoform X2 [Sander lucioperca]
MSTRG.12272.1	Dxb_GLEAN_10004207	0.977635	1	2	1	miR-466-x	0.0384615	ST8SIA6	PREDICTED: alpha-2,8-sialyltransferase 8E-like [Notothenia coriiceps]
MSTRG.12272.1	Dxb_GLEAN_10005812	0.955512	1	1	1	miR-466-x	0.0192308	Nlrc3	NACHT, LRR and PYD domains-containing protein 3-like isoform X1 [Anarrhichthys ocellatus]					s
MSTRG.12272.1	Dxb_GLEAN_10006471	0.983511	1	1	1	miR-466-x	0.0192308	STYK1	tyrosine-protein kinase STYK1-like [Acanthochromis polyacanthus]
MSTRG.12272.1	Dxb_GLEAN_10007866	0.973411	1	1	1	miR-466-x	0.0192308	PRKAR1B	PREDICTED: cAMP-dependent protein kinase type I-beta regulatory subunit [Stegastes partitus]
MSTRG.12272.1	Dxb_GLEAN_10007922	0.943153	1	2	1	miR-466-x	0.0384615	Noxo1	NADPH oxidase organizer 1-like [Cottoperca gobio]
MSTRG.12272.1	Dxb_GLEAN_10011260	0.913881	1	2	1	miR-466-x	0.0384615	GRIK1	glutamate receptor ionotropic, kainate 1-like isoform X2 [Perca flavescens]
MSTRG.12272.1	Dxb_GLEAN_10012238	0.913373	1	2	1	miR-466-x	0.0384615	RAB3A	ras-related protein Rab-3A-like [Anabas testudineus]
MSTRG.12272.1	Dxb_GLEAN_10012393	0.905357	1	2	1	miR-466-x	0.0384615	GRINA	protein lifeguard 1-like [Anarrhichthys ocellatus]
MSTRG.12272.1	Dxb_GLEAN_10012654	0.951311	1	1	1	miR-466-x	0.0192308	OTOGL	phosphatidylinositol phosphatase PTPRQ [Seriola dumerili]
MSTRG.12272.1	Dxb_GLEAN_10013941	0.937725	1	2	1	miR-466-x	0.0384615	Rdh16	retinol dehydrogenase 7-like [Perca flavescens]
MSTRG.12272.1	Dxb_GLEAN_10015984	0.93333	1	2	1	miR-466-x	0.0384615	SARG	specifically androgen-regulated gene protein-like isoform X1 [Sander lucioperca]
MSTRG.12272.1	Dxb_GLEAN_10019896	0.969929	1	2	1	miR-466-x	0.0384615	GIMAP7	GTPase IMAP family member 4-like isoform X2 [Etheostoma spectabile]
MSTRG.12272.1	Dxb_GLEAN_10020133	0.975317	1	2	1	miR-466-x	0.0384615	tyrp1	5,6-dihydroxyindole-2-carboxylic acid oxidase-like isoform X1 [Parambassis ranga]
MSTRG.1252.1	Dxb_GLEAN_10008319	0.901047	1	1	1	miR-187-x	0.0192308	Sox11	transcription factor Sox-11-like [Sparus aurata]
MSTRG.1252.1	Dxb_GLEAN_10010815	0.96521	1	2	1	miR-187-x	0.0384615	EGR1	early growth response protein 1-like [Seriola dumerili]
MSTRG.12888.1	Dxb_GLEAN_10008323	0.961843	2	1	1	novel-m0218-5p	0.0384615	cep170b	centrosomal protein of 170 kDa protein B-like isoform X3 [Acanthochromis polyacanthus]
MSTRG.12888.1	Dxb_GLEAN_10008593	0.981091	2	1	1	novel-m0218-5p	0.0384615	fos	proto-oncogene c-Fos [Larimichthys crocea]
MSTRG.12888.1	Dxb_GLEAN_10011664	0.958902	2	1	1	novel-m0218-5p	0.0384615	LAMC2	laminin subunit gamma-2-like [Sander lucioperca]
MSTRG.12888.1	Dxb_GLEAN_10014829	0.958532	2	1	1	novel-m0273-3p	0.0384615	--	PREDICTED: osmotic avoidance abnormal protein 3-like isoform X1 [Notothenia coriiceps]
MSTRG.12888.1	Dxb_GLEAN_10021240	0.922377	2	1	1	novel-m0218-5p	0.0384615	ttc39c	PREDICTED: tetratricopeptide repeat protein 39C [Lates calcarifer]
MSTRG.13340.1	Dxb_GLEAN_10003436	0.932255	6	4	3	miR-192-z|miR-466-x|novel-m0095-3p	0.00345369	dctn6	Dynactin subunit 6 [Collichthys lucidus]
MSTRG.13340.1	Dxb_GLEAN_10006032	0.928408	6	3	2	miR-466-x|novel-m0146-5p	0.0321267	PRSS36	transmembrane protease serine 9-like isoform X1 [Betta splendens]
MSTRG.13340.1	Dxb_GLEAN_10011186	0.966856	6	3	2	miR-466-x|novel-m0181-3p	0.0321267	CLDN4	claudin-4-like [Seriola lalandi dorsalis]
MSTRG.13340.1	Dxb_GLEAN_10012238	0.923258	6	2	2	miR-466-x|novel-m0146-5p	0.0113122	RAB3A	ras-related protein Rab-3A-like [Anabas testudineus]
MSTRG.13340.1	Dxb_GLEAN_10016237	0.960517	6	3	2	miR-466-x|novel-m0146-5p	0.0321267	RAB29	ras-related protein Rab-7L1-like [Anarrhichthys ocellatus]
MSTRG.13340.1	Dxb_GLEAN_10018714	0.948641	6	3	2	miR-122-x|miR-466-x	0.0321267	VTN	vitronectin [Cottoperca gobio]
MSTRG.13340.1	Dxb_GLEAN_10020133	0.943632	6	2	2	miR-466-x|novel-m0095-3p	0.0113122	tyrp1	5,6-dihydroxyindole-2-carboxylic acid oxidase-like isoform X1 [Parambassis ranga]
MSTRG.13385.1	Dxb_GLEAN_10001168	0.997156	2	1	1	miR-466-x	0.0384615	Gimap9	GTPase IMAP family member 9-like isoform X2 [Sander lucioperca]
MSTRG.13385.1	Dxb_GLEAN_10001282	0.986348	2	1	1	miR-466-x	0.0384615	--	MHC class Ia antigen [Dicentrarchus labrax]
MSTRG.13385.1	Dxb_GLEAN_10005194	0.936038	2	1	1	novel-m0040-3p	0.0384615	MLANA	melanoma antigen recognized by T-cells 1 isoform X2 [Etheostoma spectabile]
MSTRG.13385.1	Dxb_GLEAN_10005812	0.981791	2	1	1	miR-466-x	0.0384615	Nlrc3	NACHT, LRR and PYD domains-containing protein 3-like isoform X1 [Anarrhichthys ocellatus]
MSTRG.13385.1	Dxb_GLEAN_10006471	0.926078	2	1	1	miR-466-x	0.0384615	STYK1	tyrosine-protein kinase STYK1-like [Acanthochromis polyacanthus]
MSTRG.13385.1	Dxb_GLEAN_10007825	0.972561	2	1	1	miR-466-x	0.0384615	lgals3bpb	galectin-3-binding protein [Sander lucioperca]
MSTRG.13385.1	Dxb_GLEAN_10007866	0.969432	2	1	1	miR-466-x	0.0384615	PRKAR1B	PREDICTED: cAMP-dependent protein kinase type I-beta regulatory subunit [Stegastes partitus]
MSTRG.13385.1	Dxb_GLEAN_10009046	0.962931	2	1	1	novel-m0040-3p	0.0384615	pm20d2	peptidase M20 domain-containing protein 2 [Larimichthys crocea]
MSTRG.13385.1	Dxb_GLEAN_10010317	0.942122	2	5	2	miR-466-x|novel-m0040-3p	0.00754148	Cmpk2	UMP-CMP kinase 2, mitochondrial [Sander lucioperca]
MSTRG.13385.1	Dxb_GLEAN_10010431	0.952276	2	1	1	miR-466-x	0.0384615	Cd209d	C-type lectin domain family 4 member C Blood dendritic cell antigen 2 [Larimichthys crocea]
MSTRG.13385.1	Dxb_GLEAN_10011899	0.973889	2	3	2	miR-466-x|novel-m0040-3p	0.00226244	CYSLTR2	chemokine XC receptor 1-like [Myripristis murdjan]
MSTRG.13385.1	Dxb_GLEAN_10012708	0.906673	2	4	2	miR-466-x|novel-m0040-3p	0.00452489	--	pro-neuregulin-4, membrane-bound isoform [Cottoperca gobio]
MSTRG.13385.1	Dxb_GLEAN_10018714	0.955662	2	3	2	miR-466-x|novel-m0040-3p	0.00226244	VTN	vitronectin [Cottoperca gobio]
MSTRG.13385.1	Dxb_GLEAN_10019896	0.958521	2	2	2	miR-466-x|novel-m0040-3p	0.000754148	GIMAP7	GTPase IMAP family member 4-like isoform X2 [Etheostoma spectabile]
MSTRG.13385.1	Dxb_GLEAN_10020699	0.979857	2	4	2	miR-466-x|novel-m0040-3p	0.00452489	--	receptor-transporting protein 3-like [Perca flavescens]
MSTRG.13385.1	Dxb_GLEAN_10021167	0.903548	2	5	2	miR-466-x|novel-m0040-3p	0.00754148	Oca2	PREDICTED: P protein [Paralichthys olivaceus]
MSTRG.13385.1	Dxb_GLEAN_10021849	0.938796	2	1	1	miR-466-x	0.0384615	PGA	pepsin A-like [Perca flavescens]
MSTRG.14315.1	Dxb_GLEAN_10002603	0.952298	2	1	1	novel-m0051-3p	0.0384615	myc	transcriptional regulator Myc-B-like isoform X2 [Sparus aurata]
MSTRG.14315.1	Dxb_GLEAN_10002859	0.927636	2	1	1	novel-m0051-3p	0.0384615	--	sterile alpha motif domain-containing protein 3-like [Astyanax mexicanus]
MSTRG.14315.1	Dxb_GLEAN_10003713	0.925112	2	1	1	novel-m0051-3p	0.0384615	CDKL2	cyclin-dependent kinase-like 5 [Sander lucioperca]
MSTRG.14315.1	Dxb_GLEAN_10004190	0.918364	2	1	1	novel-m0051-3p	0.0384615	--	PREDICTED: fish-egg lectin-like [Lates calcarifer]
MSTRG.14315.1	Dxb_GLEAN_10004707	0.991601	2	2	2	novel-m0051-3p|novel-m0189-5p	0.000754148	Myh6	myosin-6-like [Amphiprion ocellaris]
MSTRG.14315.1	Dxb_GLEAN_10007632	0.970062	2	1	1	novel-m0189-5p	0.0384615	CNTNAP1	contactin-associated protein 1 [Amphiprion ocellaris]
MSTRG.14315.1	Dxb_GLEAN_10009147	0.914282	2	1	1	novel-m0051-3p	0.0384615	ANKRD1	ankyrin repeat domain-containing protein 1 [Labrus bergylta]
MSTRG.14315.1	Dxb_GLEAN_10009440	0.988748	2	1	1	novel-m0189-5p	0.0384615	--	arginine vasopressin-induced protein 1 isoform X1 [Anarrhichthys ocellatus]
MSTRG.14315.1	Dxb_GLEAN_10013270	0.931061	2	1	1	novel-m0051-3p	0.0384615	--	-
MSTRG.14315.1	Dxb_GLEAN_10014714	0.988485	2	1	1	novel-m0051-3p	0.0384615	dusp1-a	MAP kinase phosphatase 1 [Epinephelus coioides]
MSTRG.14315.1	Dxb_GLEAN_10014817	0.908647	2	1	1	novel-m0051-3p	0.0384615	ADAMTS3	PREDICTED: A disintegrin and metalloproteinase with thrombospondin motifs 2-like, partial [Notothenia coriiceps]
MSTRG.14315.1	Dxb_GLEAN_10016251	0.937314	2	1	1	novel-m0051-3p	0.0384615	pdzrn3b	PREDICTED: serine/arginine repetitive matrix protein 1-like [Austrofundulus limnaeus]
MSTRG.14315.1	Dxb_GLEAN_10018070	0.931256	2	1	1	novel-m0189-5p	0.0384615	Dusp2	dual specificity protein phosphatase 2-like [Amphiprion ocellaris]
MSTRG.14315.1	Dxb_GLEAN_10019149	0.902717	2	1	1	novel-m0051-3p	0.0384615	TAAR1	trace amine-associated receptor 1-like [Perca flavescens]
MSTRG.14315.1	Dxb_GLEAN_10022068	0.955447	2	1	1	novel-m0051-3p	0.0384615	EPHA2	ephrin type-A receptor 2-like [Anarrhichthys ocellatus]
MSTRG.14315.1	Dxb_GLEAN_10023261	0.988994	2	1	1	novel-m0189-5p	0.0384615	pol	Retrovirus-related Pol polyprotein from transposon 17.6 [Collichthys lucidus]
MSTRG.15030.1	Dxb_GLEAN_10007762	0.989851	1	1	1	miR-8159-x	0.0192308	MYH1	PREDICTED: myosin heavy chain, fast skeletal muscle-like [Stegastes partitus]
MSTRG.1567.1	Dxb_GLEAN_10004206	0.931413	6	3	2	miR-192-z|miR-8159-x	0.0321267	nxpe3	NXPE family member 3-like [Perca flavescens]
MSTRG.1567.1	Dxb_GLEAN_10010690	0.959851	6	2	2	miR-192-z|novel-m0040-3p	0.0113122	Mslnl	mesothelin isoform X5 [Astatotilapia calliptera]
MSTRG.1567.1	Dxb_GLEAN_10017404	0.989639	6	4	3	miR-192-z|miR-8159-x|novel-m0040-3p	0.00345369	ccdc125	coiled-coil domain-containing protein 125 isoform X2 [Cottoperca gobio]
MSTRG.15830.3	Dxb_GLEAN_10003172	0.930039	1	2	1	novel-m0051-3p	0.0384615	plcd4	1-phosphatidylinositol 4,5-bisphosphate phosphodiesterase delta-4 isoform X1 [Mastacembelus armatus]
MSTRG.15830.3	Dxb_GLEAN_10003713	0.912015	1	1	1	novel-m0051-3p	0.0192308	CDKL2	cyclin-dependent kinase-like 5 [Sander lucioperca]
MSTRG.15830.3	Dxb_GLEAN_10005746	0.965264	1	1	1	novel-m0051-3p	0.0192308	Sema4g	semaphorin-4G [Cottoperca gobio]
MSTRG.15830.3	Dxb_GLEAN_10014405	0.907574	1	2	1	novel-m0051-3p	0.0384615	Enox1	PREDICTED: ecto-NOX disulfide-thiol exchanger 1 isoform X4 [Lepisosteus oculatus]
MSTRG.15830.3	Dxb_GLEAN_10016251	0.916983	1	1	1	novel-m0051-3p	0.0192308	pdzrn3b	PREDICTED: serine/arginine repetitive matrix protein 1-like [Austrofundulus limnaeus]
MSTRG.16429.1	Dxb_GLEAN_10008662	0.964406	1	1	1	novel-m0273-3p	0.0192308	Aloxe3	hydroperoxide isomerase ALOXE3 [Larimichthys crocea]
MSTRG.16429.1	Dxb_GLEAN_10014829	0.910847	1	1	1	novel-m0273-3p	0.0192308	--	PREDICTED: osmotic avoidance abnormal protein 3-like isoform X1 [Notothenia coriiceps]
MSTRG.16429.1	Dxb_GLEAN_10018701	0.933063	1	2	1	novel-m0273-3p	0.0384615	--	aryl-hydrocarbon-interacting -like 1 [Labeo rohita]
MSTRG.16429.3	Dxb_GLEAN_10008662	0.94563	1	1	1	novel-m0273-3p	0.0192308	Aloxe3	hydroperoxide isomerase ALOXE3 [Larimichthys crocea]
MSTRG.16640.2	Dxb_GLEAN_10001168	0.903896	1	1	1	miR-466-x	0.0192308	Gimap9	GTPase IMAP family member 9-like isoform X2 [Sander lucioperca]
MSTRG.16640.2	Dxb_GLEAN_10004207	0.975521	1	2	1	miR-466-x	0.0384615	ST8SIA6	PREDICTED: alpha-2,8-sialyltransferase 8E-like [Notothenia coriiceps]
MSTRG.16640.2	Dxb_GLEAN_10005812	0.930722	1	1	1	miR-466-x	0.0192308	Nlrc3	NACHT, LRR and PYD domains-containing protein 3-like isoform X1 [Anarrhichthys ocellatus]
MSTRG.16640.2	Dxb_GLEAN_10006471	0.948851	1	1	1	miR-466-x	0.0192308	STYK1	tyrosine-protein kinase STYK1-like [Acanthochromis polyacanthus]
MSTRG.16640.2	Dxb_GLEAN_10007866	0.963984	1	1	1	miR-466-x	0.0192308	PRKAR1B	PREDICTED: cAMP-dependent protein kinase type I-beta regulatory subunit [Stegastes partitus]
MSTRG.16640.2	Dxb_GLEAN_10007922	0.932372	1	2	1	miR-466-x	0.0384615	Noxo1	NADPH oxidase organizer 1-like [Cottoperca gobio]
MSTRG.16640.2	Dxb_GLEAN_10007949	0.924636	1	2	1	miR-466-x	0.0384615	--	GATA zinc finger domain-containing protein 14-like [Anarrhichthys ocellatus]
MSTRG.16640.2	Dxb_GLEAN_10010431	0.907643	1	1	1	miR-466-x	0.0192308	Cd209d	C-type lectin domain family 4 member C Blood dendritic cell antigen 2 [Larimichthys crocea]
MSTRG.16640.2	Dxb_GLEAN_10012393	0.90597	1	2	1	miR-466-x	0.0384615	GRINA	protein lifeguard 1-like [Anarrhichthys ocellatus]
MSTRG.16640.2	Dxb_GLEAN_10012654	0.924992	1	1	1	miR-466-x	0.0192308	OTOGL	phosphatidylinositol phosphatase PTPRQ [Seriola dumerili]
MSTRG.16640.2	Dxb_GLEAN_10013941	0.934983	1	2	1	miR-466-x	0.0384615	Rdh16	retinol dehydrogenase 7-like [Perca flavescens]
MSTRG.16640.2	Dxb_GLEAN_10015984	0.910817	1	2	1	miR-466-x	0.0384615	SARG	specifically androgen-regulated gene protein-like isoform X1 [Sander lucioperca]
MSTRG.16640.2	Dxb_GLEAN_10019896	0.978232	1	2	1	miR-466-x	0.0384615	GIMAP7	GTPase IMAP family member 4-like isoform X2 [Etheostoma spectabile]
MSTRG.16640.2	Dxb_GLEAN_10020133	0.95397	1	2	1	miR-466-x	0.0384615	tyrp1	5,6-dihydroxyindole-2-carboxylic acid oxidase-like isoform X1 [Parambassis ranga]
MSTRG.16694.1	Dxb_GLEAN_10010690	0.994769	1	2	1	miR-192-z	0.0384615	Mslnl	mesothelin isoform X5 [Astatotilapia calliptera]
MSTRG.16756.1	Dxb_GLEAN_10005539	0.9597	3	5	2	miR-466-x|novel-m0146-5p	0.0217195	GRK5	G protein-coupled receptor kinase 5-like isoform X2 [Sparus aurata]
MSTRG.16756.1	Dxb_GLEAN_10005865	0.90519	3	5	2	novel-m0146-5p|novel-m0202-3p	0.0217195	Adam9	disintegrin and metalloproteinase domain-containing protein 9-like isoform X1 [Sander lucioperca]
MSTRG.16756.1	Dxb_GLEAN_10006032	0.967354	3	3	2	miR-466-x|novel-m0146-5p	0.00669683	PRSS36	transmembrane protease serine 9-like isoform X1 [Betta splendens]
MSTRG.16756.1	Dxb_GLEAN_10008635	0.941295	3	4	2	miR-466-x|novel-m0202-3p	0.0132127	FAM110C	protein FAM110C [Sander lucioperca]
MSTRG.16756.1	Dxb_GLEAN_10012238	0.984059	3	2	2	miR-466-x|novel-m0146-5p	0.00226244	RAB3A	ras-related protein Rab-3A-like [Anabas testudineus]
MSTRG.16756.1	Dxb_GLEAN_10013941	0.958859	3	2	2	miR-466-x|novel-m0202-3p	0.00226244	Rdh16	retinol dehydrogenase 7-like [Perca flavescens]
MSTRG.16756.1	Dxb_GLEAN_10022254	0.960529	3	6	2	miR-466-x|novel-m0202-3p	0.0321267	KLHDC7A	kelch domain-containing protein 7A-like [Sander lucioperca]
MSTRG.17068.1	Dxb_GLEAN_10007654	0.964453	1	1	1	novel-m0077-5p	0.0192308	MAFK	transcription factor MafK [Seriola dumerili]
MSTRG.17068.1	Dxb_GLEAN_10007692	0.970347	1	1	1	novel-m0077-5p	0.0192308	ndel1b	nuclear distribution protein nudE-like 1-B [Cottoperca gobio]
MSTRG.17068.1	Dxb_GLEAN_10008590	0.911432	1	2	1	novel-m0077-5p	0.0384615	--	leucine-rich repeat-containing protein 74A-like [Perca flavescens]
MSTRG.17068.1	Dxb_GLEAN_10017260	0.949723	1	2	1	novel-m0077-5p	0.0384615	MCL1	induced myeloid leukemia cell differentiation protein Mcl-1 homolog [Perca flavescens]
MSTRG.17068.1	Dxb_GLEAN_10020581	0.931658	1	2	1	novel-m0077-5p	0.0384615	Prg4	proteoglycan 4-like isoform X2 [Sander lucioperca]
MSTRG.17514.1	Dxb_GLEAN_10021072	0.942346	1	1	1	miR-466-x	0.0192308	PCSK9	proprotein convertase subtilisin/kexin type 9 [Larimichthys crocea]
MSTRG.1799.1	Dxb_GLEAN_10004707	0.988624	1	2	1	novel-m0189-5p	0.0384615	Myh6	myosin-6-like [Amphiprion ocellaris]
MSTRG.1799.1	Dxb_GLEAN_10007025	0.946399	1	2	1	novel-m0189-5p	0.0384615	FABP3	PREDICTED: fatty acid-binding protein, heart-like [Paralichthys olivaceus]
MSTRG.1799.1	Dxb_GLEAN_10007632	0.971089	1	1	1	novel-m0189-5p	0.0192308	CNTNAP1	contactin-associated protein 1 [Amphiprion ocellaris]
MSTRG.1799.1	Dxb_GLEAN_10009440	0.983996	1	1	1	novel-m0189-5p	0.0192308	--	arginine vasopressin-induced protein 1 isoform X1 [Anarrhichthys ocellatus]
MSTRG.1799.1	Dxb_GLEAN_10015109	0.985292	1	2	1	novel-m0189-5p	0.0384615	HS3ST1	heparan sulfate glucosamine 3-O-sulfotransferase 1 [Sparus aurata]
MSTRG.1799.1	Dxb_GLEAN_10018070	0.927285	1	1	1	novel-m0189-5p	0.0192308	Dusp2	dual specificity protein phosphatase 2-like [Amphiprion ocellaris]
MSTRG.1799.1	Dxb_GLEAN_10021355	0.933834	1	2	1	novel-m0189-5p	0.0384615	G0s2	G0/G1 switch protein 2-like [Sander lucioperca]
MSTRG.1799.1	Dxb_GLEAN_10023261	0.987344	1	1	1	novel-m0189-5p	0.0192308	pol	Retrovirus-related Pol polyprotein from transposon 17.6 [Collichthys lucidus]
MSTRG.183.1	Dxb_GLEAN_10006032	0.955685	7	3	2	miR-466-x|novel-m0146-5p	0.0443439	PRSS36	transmembrane protease serine 9-like isoform X1 [Betta splendens]
MSTRG.183.1	Dxb_GLEAN_10007490	0.91501	7	6	3	miR-192-z|miR-466-x|novel-m0202-3p	0.0261439	Mybpc2	myosin-binding protein C, fast-type isoform X1 [Anabas testudineus]
MSTRG.183.1	Dxb_GLEAN_10007951	0.924362	7	5	3	miR-215-x|miR-466-x|novel-m0146-5p	0.0139463	--	uncharacterized LOC103392932 precursor [Cynoglossus semilaevis]
MSTRG.183.1	Dxb_GLEAN_10008635	0.979963	7	4	3	miR-466-x|novel-m0181-3p|novel-m0202-3p	0.00594699	FAM110C	protein FAM110C [Sander lucioperca]
MSTRG.183.1	Dxb_GLEAN_10011186	0.98541	7	3	2	miR-466-x|novel-m0181-3p	0.0443439	CLDN4	claudin-4-like [Seriola lalandi dorsalis]
MSTRG.183.1	Dxb_GLEAN_10012238	0.94148	7	2	2	miR-466-x|novel-m0146-5p	0.0158371	RAB3A	ras-related protein Rab-3A-like [Anabas testudineus]
MSTRG.183.1	Dxb_GLEAN_10013941	0.930583	7	2	2	miR-466-x|novel-m0202-3p	0.0158371	Rdh16	retinol dehydrogenase 7-like [Perca flavescens]
MSTRG.183.1	Dxb_GLEAN_10016237	0.942477	7	3	2	miR-466-x|novel-m0146-5p	0.0443439	RAB29	ras-related protein Rab-7L1-like [Anarrhichthys ocellatus]
MSTRG.183.1	Dxb_GLEAN_10017333	0.928589	7	5	3	miR-192-x|miR-215-x|miR-466-x	0.0139463	TP53INP1	LOW QUALITY PROTEIN: tumor protein p53-inducible nuclear protein 1 [Cottoperca gobio]
MSTRG.183.1	Dxb_GLEAN_10022254	0.946362	7	6	3	miR-192-z|miR-466-x|novel-m0202-3p	0.0261439	KLHDC7A	kelch domain-containing protein 7A-like [Sander lucioperca]
MSTRG.18403.1	Dxb_GLEAN_10002603	0.94999	1	1	1	novel-m0051-3p	0.0192308	myc	transcriptional regulator Myc-B-like isoform X2 [Sparus aurata]
MSTRG.18403.1	Dxb_GLEAN_10002859	0.940841	1	1	1	novel-m0051-3p	0.0192308	--	sterile alpha motif domain-containing protein 3-like [Astyanax mexicanus]
MSTRG.18403.1	Dxb_GLEAN_10003172	0.953968	1	2	1	novel-m0051-3p	0.0384615	plcd4	1-phosphatidylinositol 4,5-bisphosphate phosphodiesterase delta-4 isoform X1 [Mastacembelus armatus]
MSTRG.18403.1	Dxb_GLEAN_10003713	0.962946	1	1	1	novel-m0051-3p	0.0192308	CDKL2	cyclin-dependent kinase-like 5 [Sander lucioperca]
MSTRG.18403.1	Dxb_GLEAN_10004707	0.956511	1	2	1	novel-m0051-3p	0.0384615	Myh6	myosin-6-like [Amphiprion ocellaris]
MSTRG.18403.1	Dxb_GLEAN_10005129	0.986178	1	2	1	novel-m0051-3p	0.0384615	Klf4	Krueppel-like factor 4 isoform X2 [Sander lucioperca]
MSTRG.18403.1	Dxb_GLEAN_10005746	0.905577	1	1	1	novel-m0051-3p	0.0192308	Sema4g	semaphorin-4G [Cottoperca gobio]
MSTRG.18403.1	Dxb_GLEAN_10009147	0.901168	1	1	1	novel-m0051-3p	0.0192308	ANKRD1	ankyrin repeat domain-containing protein 1 [Labrus bergylta]
MSTRG.18403.1	Dxb_GLEAN_10009904	0.914672	1	2	1	novel-m0051-3p	0.0384615	PRKD1	serine/threonine-protein kinase D1-like [Acanthochromis polyacanthus]
MSTRG.18403.1	Dxb_GLEAN_10010815	0.984421	1	2	1	novel-m0051-3p	0.0384615	EGR1	early growth response protein 1-like [Seriola dumerili]
MSTRG.18403.1	Dxb_GLEAN_10012520	0.95263	1	2	1	novel-m0051-3p	0.0384615	PAPPA2	pappalysin-2 [Perca flavescens]
MSTRG.18403.1	Dxb_GLEAN_10014405	0.966288	1	2	1	novel-m0051-3p	0.0384615	Enox1	PREDICTED: ecto-NOX disulfide-thiol exchanger 1 isoform X4 [Lepisosteus oculatus]
MSTRG.18403.1	Dxb_GLEAN_10014714	0.990851	1	1	1	novel-m0051-3p	0.0192308	dusp1-a	MAP kinase phosphatase 1 [Epinephelus coioides]
MSTRG.18403.1	Dxb_GLEAN_10016251	0.968637	1	1	1	novel-m0051-3p	0.0192308	pdzrn3b	PREDICTED: serine/arginine repetitive matrix protein 1-like [Austrofundulus limnaeus]
MSTRG.18403.1	Dxb_GLEAN_10019149	0.946006	1	1	1	novel-m0051-3p	0.0192308	TAAR1	trace amine-associated receptor 1-like [Perca flavescens]
MSTRG.18403.1	Dxb_GLEAN_10022068	0.965209	1	1	1	novel-m0051-3p	0.0192308	EPHA2	ephrin type-A receptor 2-like [Anarrhichthys ocellatus]
MSTRG.18627.1	Dxb_GLEAN_10002645	0.913424	3	5	2	miR-466-x|novel-m0202-3p	0.0217195	Btn2a2	stonustoxin subunit beta-like [Etheostoma spectabile]
MSTRG.18627.1	Dxb_GLEAN_10003645	0.953853	3	2	2	miR-466-x|novel-m0202-3p	0.00226244	--	PREDICTED: polyubiquitin-like [Neolamprologus brichardi]
MSTRG.18627.1	Dxb_GLEAN_10007588	0.969323	3	5	2	miR-466-x|novel-m0202-3p	0.0217195	mreg	melanoregulin-like [Larimichthys crocea]
MSTRG.18627.1	Dxb_GLEAN_10010317	0.915755	3	5	2	miR-466-x|novel-m0202-3p	0.0217195	Cmpk2	UMP-CMP kinase 2, mitochondrial [Sander lucioperca]
MSTRG.18627.1	Dxb_GLEAN_10012393	0.939911	3	2	2	miR-466-x|novel-m0202-3p	0.00226244	GRINA	protein lifeguard 1-like [Anarrhichthys ocellatus]
MSTRG.19046.1	Dxb_GLEAN_10001168	0.931272	2	1	1	miR-466-x	0.0384615	Gimap9	GTPase IMAP family member 9-like isoform X2 [Sander lucioperca]
MSTRG.19046.1	Dxb_GLEAN_10003557	0.930847	2	1	1	novel-m0015-3p	0.0384615	secA	protein translocase subunit SecA-like [Mastacembelus armatus]
MSTRG.19046.1	Dxb_GLEAN_10005812	0.969259	2	1	1	miR-466-x	0.0384615	Nlrc3	NACHT, LRR and PYD domains-containing protein 3-like isoform X1 [Anarrhichthys ocellatus]
MSTRG.19046.1	Dxb_GLEAN_10005988	0.962199	2	6	2	miR-466-x|novel-m0015-3p	0.0113122	Tecta	PREDICTED: LOW QUALITY PROTEIN: IgGFc-binding protein-like [Lates calcarifer]
MSTRG.19046.1	Dxb_GLEAN_10006032	0.944323	2	3	2	miR-466-x|novel-m0015-3p	0.00226244	PRSS36	transmembrane protease serine 9-like isoform X1 [Betta splendens]
MSTRG.19046.1	Dxb_GLEAN_10006448	0.968867	2	3	2	miR-466-x|novel-m0015-3p	0.00226244	chs-2	chitin synthase chs-1-like [Sparus aurata]
MSTRG.19046.1	Dxb_GLEAN_10006471	0.95494	2	1	1	miR-466-x	0.0384615	STYK1	tyrosine-protein kinase STYK1-like [Acanthochromis polyacanthus]
MSTRG.19046.1	Dxb_GLEAN_10007866	0.959842	2	1	1	miR-466-x	0.0384615	PRKAR1B	PREDICTED: cAMP-dependent protein kinase type I-beta regulatory subunit [Stegastes partitus]
MSTRG.19046.1	Dxb_GLEAN_10007922	0.929582	2	2	2	miR-466-x|novel-m0015-3p	0.000754148	Noxo1	NADPH oxidase organizer 1-like [Cottoperca gobio]
MSTRG.19046.1	Dxb_GLEAN_10010317	0.930395	2	5	2	miR-466-x|novel-m0015-3p	0.00754148	Cmpk2	UMP-CMP kinase 2, mitochondrial [Sander lucioperca]
MSTRG.19046.1	Dxb_GLEAN_10011899	0.961158	2	3	2	miR-466-x|novel-m0015-3p	0.00226244	CYSLTR2	chemokine XC receptor 1-like [Myripristis murdjan]
MSTRG.19046.1	Dxb_GLEAN_10012654	0.910462	2	1	1	miR-466-x	0.0384615	OTOGL	phosphatidylinositol phosphatase PTPRQ [Seriola dumerili]
MSTRG.19046.1	Dxb_GLEAN_10012856	0.931375	2	3	2	miR-466-x|novel-m0015-3p	0.00226244	Smim29	LOW QUALITY PROTEIN: protein Bouncer-like [Sander lucioperca]
MSTRG.19046.1	Dxb_GLEAN_10020699	0.909883	2	4	2	miR-466-x|novel-m0015-3p	0.00452489	--	receptor-transporting protein 3-like [Perca flavescens]
MSTRG.19046.1	Dxb_GLEAN_10022254	0.90354	2	6	2	miR-466-x|novel-m0015-3p	0.0113122	KLHDC7A	kelch domain-containing protein 7A-like [Sander lucioperca]
MSTRG.19785.1	Dxb_GLEAN_10005129	0.993714	1	2	1	novel-m0218-5p	0.0384615	Klf4	Krueppel-like factor 4 isoform X2 [Sander lucioperca]
MSTRG.19785.1	Dxb_GLEAN_10008323	0.905069	1	1	1	novel-m0218-5p	0.0192308	cep170b	centrosomal protein of 170 kDa protein B-like isoform X3 [Acanthochromis polyacanthus]
MSTRG.19785.1	Dxb_GLEAN_10008593	0.983527	1	1	1	novel-m0218-5p	0.0192308	fos	proto-oncogene c-Fos [Larimichthys crocea]
MSTRG.19785.1	Dxb_GLEAN_10011664	0.994219	1	1	1	novel-m0218-5p	0.0192308	LAMC2	laminin subunit gamma-2-like [Sander lucioperca]
MSTRG.19785.1	Dxb_GLEAN_10012029	0.973846	1	2	1	novel-m0218-5p	0.0384615	Lama3	laminin subunit alpha-3 isoform X1 [Sander lucioperca]
MSTRG.19785.1	Dxb_GLEAN_10017260	0.990404	1	2	1	novel-m0218-5p	0.0384615	MCL1	induced myeloid leukemia cell differentiation protein Mcl-1 homolog [Perca flavescens]
MSTRG.1993.3	Dxb_GLEAN_10005129	0.944844	3	2	2	novel-m0051-3p|novel-m0218-5p	0.00226244	Klf4	Krueppel-like factor 4 isoform X2 [Sander lucioperca]
MSTRG.20021.2	Dxb_GLEAN_10010312	0.954341	2	3	2	miR-3549-z|novel-m0081-3p	0.00226244	IMPG1	interphotoreceptor matrix proteoglycan 1-like isoform X4 [Seriola lalandi dorsalis]
MSTRG.20052.1	Dxb_GLEAN_10019114	0.94862	1	1	1	miR-8159-x	0.0192308	--	leucine-rich repeat-containing protein 15-like [Cottoperca gobio]
MSTRG.20528.1	Dxb_GLEAN_10005989	0.960001	4	5	2	novel-m0120-5p|novel-m0121-3p	0.0416844	Tecta	PREDICTED: LOW QUALITY PROTEIN: IgGFc-binding protein-like [Lates calcarifer]
MSTRG.20528.1	Dxb_GLEAN_10007588	0.933225	4	5	2	novel-m0120-5p|novel-m0121-3p	0.0416844	mreg	melanoregulin-like [Larimichthys crocea]
MSTRG.20528.1	Dxb_GLEAN_10011350	0.950175	4	5	3	miR-625-x|novel-m0120-5p|novel-m0121-3p	0.00175455	amer2	APC membrane recruitment protein 2-like [Takifugu rubripes]
MSTRG.20528.1	Dxb_GLEAN_10015515	0.935971	4	3	2	novel-m0120-5p|novel-m0121-3p	0.0132127	BPI	lipopolysaccharide-binding protein-like [Cottoperca gobio]
MSTRG.20826.2	Dxb_GLEAN_10001726	0.929957	1	2	1	novel-m0015-3p	0.0384615	Trim16	tripartite motif-containing protein 16-like [Larimichthys crocea]
MSTRG.21024.1	Dxb_GLEAN_10007058	0.954429	1	2	1	novel-m0040-3p	0.0384615	--	Receptor-transporting protein 3 [Anoplopoma fimbria]
MSTRG.21024.1	Dxb_GLEAN_10009046	0.955911	1	1	1	novel-m0040-3p	0.0192308	pm20d2	peptidase M20 domain-containing protein 2 [Larimichthys crocea]
MSTRG.21024.1	Dxb_GLEAN_10017419	0.931891	1	2	1	novel-m0040-3p	0.0384615	HMGCR	3-hydroxy-3-methylglutaryl-CoA reductase [Epinephelus lanceolatus]
MSTRG.21024.1	Dxb_GLEAN_10018028	0.915105	1	2	1	novel-m0040-3p	0.0384615	Znf366	zinc finger protein 366-like [Cottoperca gobio]
MSTRG.21720.1	Dxb_GLEAN_10002859	0.967836	1	1	1	novel-m0051-3p	0.0192308	--	sterile alpha motif domain-containing protein 3-like [Astyanax mexicanus]
MSTRG.21720.1	Dxb_GLEAN_10003713	0.915871	1	1	1	novel-m0051-3p	0.0192308	CDKL2	cyclin-dependent kinase-like 5 [Sander lucioperca]
MSTRG.21720.1	Dxb_GLEAN_10004707	0.942452	1	2	1	novel-m0051-3p	0.0384615	Myh6	myosin-6-like [Amphiprion ocellaris]
MSTRG.21720.1	Dxb_GLEAN_10005129	0.976602	1	2	1	novel-m0051-3p	0.0384615	Klf4	Krueppel-like factor 4 isoform X2 [Sander lucioperca]
MSTRG.21720.1	Dxb_GLEAN_10005672	0.949381	1	1	1	novel-m0051-3p	0.0192308	ELOVL6	elongation of very long chain fatty acids protein 6-like [Seriola dumerili]
MSTRG.21720.1	Dxb_GLEAN_10006400	0.918511	1	2	1	novel-m0051-3p	0.0384615	RTase	Transposable element [Takifugu flavidus]
MSTRG.21720.1	Dxb_GLEAN_10009147	0.972056	1	1	1	novel-m0051-3p	0.0192308	ANKRD1	ankyrin repeat domain-containing protein 1 [Labrus bergylta]
MSTRG.21720.1	Dxb_GLEAN_10010815	0.952086	1	2	1	novel-m0051-3p	0.0384615	EGR1	early growth response protein 1-like [Seriola dumerili]
MSTRG.21720.1	Dxb_GLEAN_10014405	0.905202	1	2	1	novel-m0051-3p	0.0384615	Enox1	PREDICTED: ecto-NOX disulfide-thiol exchanger 1 isoform X4 [Lepisosteus oculatus]
MSTRG.21720.1	Dxb_GLEAN_10014714	0.975878	1	1	1	novel-m0051-3p	0.0192308	dusp1-a	MAP kinase phosphatase 1 [Epinephelus coioides]
MSTRG.21720.1	Dxb_GLEAN_10014817	0.949127	1	1	1	novel-m0051-3p	0.0192308	ADAMTS3	PREDICTED: A disintegrin and metalloproteinase with thrombospondin motifs 2-like, partial [Notothenia coriiceps]
MSTRG.21720.1	Dxb_GLEAN_10016251	0.90319	1	1	1	novel-m0051-3p	0.0192308	pdzrn3b	PREDICTED: serine/arginine repetitive matrix protein 1-like [Austrofundulus limnaeus]
MSTRG.21720.1	Dxb_GLEAN_10019149	0.971493	1	1	1	novel-m0051-3p	0.0192308	TAAR1	trace amine-associated receptor 1-like [Perca flavescens]
MSTRG.21720.1	Dxb_GLEAN_10022068	0.975387	1	1	1	novel-m0051-3p	0.0192308	EPHA2	ephrin type-A receptor 2-like [Anarrhichthys ocellatus]
MSTRG.22093.3	Dxb_GLEAN_10022278	0.991509	2	1	1	novel-m0146-5p	0.0384615	Fer1l4	fer-1-like protein 4 [Sander lucioperca]
MSTRG.22133.4	Dxb_GLEAN_10011260	0.946267	1	2	1	miR-466-x	0.0384615	GRIK1	glutamate receptor ionotropic, kainate 1-like isoform X2 [Perca flavescens]
MSTRG.22133.4	Dxb_GLEAN_10012238	0.928327	1	2	1	miR-466-x	0.0384615	RAB3A	ras-related protein Rab-3A-like [Anabas testudineus]
MSTRG.2242.1	Dxb_GLEAN_10004205	0.925122	1	1	1	novel-m0342-5p	0.0192308	nxpe3	NXPE family member 3-like [Perca flavescens]
MSTRG.2242.1	Dxb_GLEAN_10004207	0.98267	1	2	1	novel-m0342-5p	0.0384615	ST8SIA6	PREDICTED: alpha-2,8-sialyltransferase 8E-like [Notothenia coriiceps]
MSTRG.2242.1	Dxb_GLEAN_10007115	0.949622	1	1	1	novel-m0342-5p	0.0192308	ST3GAL1	CMP-N-acetylneuraminate-beta-galactosamide-alpha-2,3-sialyltransferase 1-like [Mastacembelus armatus]
MSTRG.2242.1	Dxb_GLEAN_10011901	0.908639	1	2	1	novel-m0342-5p	0.0384615	XCR1	chemokine XC receptor 1-like [Sander lucioperca]
MSTRG.2242.1	Dxb_GLEAN_10012778	0.96997	1	2	1	novel-m0342-5p	0.0384615	TRIM27	zinc-binding protein A33-like [Sander lucioperca]
MSTRG.2242.1	Dxb_GLEAN_10013214	0.932069	1	2	1	novel-m0342-5p	0.0384615	SLC23A1	solute carrier family 23 member 1-like [Seriola lalandi dorsalis]
MSTRG.24133.1	Dxb_GLEAN_10013067	0.974415	2	2	2	novel-m0151-5p|novel-m0152-5p	0.000754148	AMPD3	AMP deaminase 3-like isoform X1 [Seriola lalandi dorsalis]
MSTRG.24608.3	Dxb_GLEAN_10007654	0.939822	1	1	1	novel-m0077-5p	0.0192308	MAFK	transcription factor MafK [Seriola dumerili]
MSTRG.24608.3	Dxb_GLEAN_10016859	0.924758	1	1	1	novel-m0077-5p	0.0192308	Prss1	pancreatic trypsinogen [Epinephelus coioides]
MSTRG.24705.2	Dxb_GLEAN_10001168	0.934212	1	1	1	miR-466-x	0.0192308	Gimap9	GTPase IMAP family member 9-like isoform X2 [Sander lucioperca]
MSTRG.24705.2	Dxb_GLEAN_10007825	0.978478	1	1	1	miR-466-x	0.0192308	lgals3bpb	galectin-3-binding protein [Sander lucioperca]
MSTRG.24705.2	Dxb_GLEAN_10007866	0.921264	1	1	1	miR-466-x	0.0192308	PRKAR1B	PREDICTED: cAMP-dependent protein kinase type I-beta regulatory subunit [Stegastes partitus]
MSTRG.24705.2	Dxb_GLEAN_10007949	0.968393	1	2	1	miR-466-x	0.0384615	--	GATA zinc finger domain-containing protein 14-like [Anarrhichthys ocellatus]
MSTRG.24705.2	Dxb_GLEAN_10010431	0.986371	1	1	1	miR-466-x	0.0192308	Cd209d	C-type lectin domain family 4 member C Blood dendritic cell antigen 2 [Larimichthys crocea]
MSTRG.24705.2	Dxb_GLEAN_10012393	0.926887	1	2	1	miR-466-x	0.0384615	GRINA	protein lifeguard 1-like [Anarrhichthys ocellatus]
MSTRG.24705.2	Dxb_GLEAN_10015984	0.902218	1	2	1	miR-466-x	0.0384615	SARG	specifically androgen-regulated gene protein-like isoform X1 [Sander lucioperca]
MSTRG.24705.2	Dxb_GLEAN_10019896	0.93061	1	2	1	miR-466-x	0.0384615	GIMAP7	GTPase IMAP family member 4-like isoform X2 [Etheostoma spectabile]
MSTRG.24705.2	Dxb_GLEAN_10020133	0.917061	1	2	1	miR-466-x	0.0384615	tyrp1	5,6-dihydroxyindole-2-carboxylic acid oxidase-like isoform X1 [Parambassis ranga]
MSTRG.24705.2	Dxb_GLEAN_10021849	0.982009	1	1	1	miR-466-x	0.0192308	PGA	pepsin A-like [Perca flavescens]
MSTRG.24775.3	Dxb_GLEAN_10002861	0.918316	2	5	2	miR-3549-z|novel-m0081-3p	0.00754148	PNMA2	zinc finger CCHC domain-containing 12-like protein [Labeo rohita]
MSTRG.24775.3	Dxb_GLEAN_10009255	0.950049	2	2	2	miR-3549-z|novel-m0081-3p	0.000754148	Sdccag8	serologically defined colon cancer antigen 8 isoform X2 [Cottoperca gobio]
MSTRG.24775.3	Dxb_GLEAN_10010300	0.90558	2	3	2	miR-3549-z|novel-m0081-3p	0.00226244	--	NK-lysin [Hyporthodus septemfasciatus]
MSTRG.2491.1	Dxb_GLEAN_10011075	0.989398	3	4	3	miR-192-x|miR-215-x|miR-215-z	0.000180995	SLC6A12	sodium- and chloride-dependent GABA transporter 2-like [Seriola lalandi dorsalis]
MSTRG.25342.1	Dxb_GLEAN_10003557	0.955905	2	1	1	novel-m0015-3p	0.0384615	secA	protein translocase subunit SecA-like [Mastacembelus armatus]
MSTRG.25514.1	Dxb_GLEAN_10001043	0.969477	1	2	1	novel-m0095-3p	0.0384615	--	immune-associated nucleotide-binding protein 12-like [Perca flavescens]
MSTRG.26107.1	Dxb_GLEAN_10002861	0.922496	2	5	2	miR-3549-z|novel-m0081-3p	0.00754148	PNMA2	zinc finger CCHC domain-containing 12-like protein [Labeo rohita]
MSTRG.26107.1	Dxb_GLEAN_10009255	0.938276	2	2	2	miR-3549-z|novel-m0081-3p	0.000754148	Sdccag8	serologically defined colon cancer antigen 8 isoform X2 [Cottoperca gobio]
MSTRG.26107.1	Dxb_GLEAN_10010300	0.950176	2	3	2	miR-3549-z|novel-m0081-3p	0.00226244	--	NK-lysin [Hyporthodus septemfasciatus]
MSTRG.26249.1	Dxb_GLEAN_10001916	0.95046	1	1	1	novel-m0181-3p	0.0192308	FCGBP	Alpha-tectorin [Dicentrarchus labrax]
MSTRG.26249.1	Dxb_GLEAN_10009825	0.992779	1	2	1	novel-m0181-3p	0.0384615	SLC2A9	PREDICTED: solute carrier family 2, facilitated glucose transporter member 9-like [Lates calcarifer]
MSTRG.26249.1	Dxb_GLEAN_10022390	0.92266	1	2	1	novel-m0181-3p	0.0384615	Trim39	nuclear factor 7, ovary-like [Seriola dumerili]
MSTRG.26906.1	Dxb_GLEAN_10012238	0.941546	1	2	1	miR-466-x	0.0384615	RAB3A	ras-related protein Rab-3A-like [Anabas testudineus]
MSTRG.26906.1	Dxb_GLEAN_10012654	0.915014	1	1	1	miR-466-x	0.0192308	OTOGL	phosphatidylinositol phosphatase PTPRQ [Seriola dumerili]
MSTRG.26906.1	Dxb_GLEAN_10021072	0.9939	1	1	1	miR-466-x	0.0192308	PCSK9	proprotein convertase subtilisin/kexin type 9 [Larimichthys crocea]
MSTRG.29484.2	Dxb_GLEAN_10007692	0.902241	1	1	1	novel-m0077-5p	0.0192308	ndel1b	nuclear distribution protein nudE-like 1-B [Cottoperca gobio]
MSTRG.29484.2	Dxb_GLEAN_10020581	0.940146	1	2	1	novel-m0077-5p	0.0384615	Prg4	proteoglycan 4-like isoform X2 [Sander lucioperca]
MSTRG.30138.1	Dxb_GLEAN_10012238	0.985226	1	2	1	miR-466-x	0.0384615	RAB3A	ras-related protein Rab-3A-like [Anabas testudineus]
MSTRG.30138.1	Dxb_GLEAN_10012654	0.961197	1	1	1	miR-466-x	0.0192308	OTOGL	phosphatidylinositol phosphatase PTPRQ [Seriola dumerili]
MSTRG.30138.1	Dxb_GLEAN_10013941	0.911746	1	2	1	miR-466-x	0.0384615	Rdh16	retinol dehydrogenase 7-like [Perca flavescens]
MSTRG.30138.1	Dxb_GLEAN_10021072	0.975813	1	1	1	miR-466-x	0.0192308	PCSK9	proprotein convertase subtilisin/kexin type 9 [Larimichthys crocea]
MSTRG.30354.4	Dxb_GLEAN_10004238	0.929326	2	3	2	miR-1271-x|miR-152-x	0.00226244	TLR1	TLR1-2 [Epinephelus coioides]
MSTRG.3042.1	Dxb_GLEAN_10003424	0.927247	1	2	1	miR-194-x	0.0384615	tyrp1	5,6-dihydroxyindole-2-carboxylic acid oxidase [Seriola dumerili]
MSTRG.3042.1	Dxb_GLEAN_10012778	0.963371	1	2	1	miR-194-x	0.0384615	TRIM27	zinc-binding protein A33-like [Sander lucioperca]
MSTRG.3042.1	Dxb_GLEAN_10020618	0.931135	1	2	1	miR-194-x	0.0384615	ARRDC2	arrestin domain-containing protein 2 isoform X2 [Larimichthys crocea]
MSTRG.3046.1	Dxb_GLEAN_10005129	0.999047	1	2	1	novel-m0218-5p	0.0384615	Klf4	Krueppel-like factor 4 isoform X2 [Sander lucioperca]
MSTRG.3046.1	Dxb_GLEAN_10008323	0.917113	1	1	1	novel-m0218-5p	0.0192308	cep170b	centrosomal protein of 170 kDa protein B-like isoform X3 [Acanthochromis polyacanthus]
MSTRG.3046.1	Dxb_GLEAN_10008593	0.99826	1	1	1	novel-m0218-5p	0.0192308	fos	proto-oncogene c-Fos [Larimichthys crocea]
MSTRG.3046.1	Dxb_GLEAN_10011664	0.992336	1	1	1	novel-m0218-5p	0.0192308	LAMC2	laminin subunit gamma-2-like [Sander lucioperca]
MSTRG.3046.1	Dxb_GLEAN_10012029	0.984384	1	2	1	novel-m0218-5p	0.0384615	Lama3	laminin subunit alpha-3 isoform X1 [Sander lucioperca]
MSTRG.3046.1	Dxb_GLEAN_10017260	0.994865	1	2	1	novel-m0218-5p	0.0384615	MCL1	induced myeloid leukemia cell differentiation protein Mcl-1 homolog [Perca flavescens]
MSTRG.4981.2	Dxb_GLEAN_10001726	0.926842	1	2	1	novel-m0015-3p	0.0384615	Trim16	tripartite motif-containing protein 16-like [Larimichthys crocea]
MSTRG.4981.2	Dxb_GLEAN_10003557	0.963822	1	1	1	novel-m0015-3p	0.0192308	secA	protein translocase subunit SecA-like [Mastacembelus armatus]
MSTRG.4981.2	Dxb_GLEAN_10006306	0.915303	1	1	1	novel-m0015-3p	0.0192308	PLCXD1	PI-PLC X domain-containing protein 1-like [Cottoperca gobio]
MSTRG.4981.2	Dxb_GLEAN_10007058	0.956142	1	2	1	novel-m0015-3p	0.0384615	--	Receptor-transporting protein 3 [Anoplopoma fimbria]
MSTRG.4981.2	Dxb_GLEAN_10007922	0.973918	1	2	1	novel-m0015-3p	0.0384615	Noxo1	NADPH oxidase organizer 1-like [Cottoperca gobio]
MSTRG.5116.1	Dxb_GLEAN_10009946	0.933865	1	1	1	novel-m0254-5p	0.0192308	foxi1c	forkhead box protein I1c-like [Sparus aurata]
MSTRG.5116.1	Dxb_GLEAN_10010167	0.935026	1	1	1	novel-m0254-5p	0.0192308	GADD45B	growth arrest and DNA damage-inducible protein GADD45 beta-like [Parambassis ranga]
MSTRG.5116.1	Dxb_GLEAN_10013943	0.954804	1	1	1	novel-m0254-5p	0.0192308	LRP2	low-density lipoprotein receptor-related protein 2 isoform X1 [Perca flavescens]
MSTRG.5116.1	Dxb_GLEAN_10014392	0.91214	1	1	1	novel-m0254-5p	0.0192308	ARL4C	ADP-ribosylation factor-like protein 4C [Seriola dumerili]
MSTRG.5116.1	Dxb_GLEAN_10020238	0.900396	1	1	1	novel-m0254-5p	0.0192308	Cxcl2	interleukin-8 [Epinephelus coioides]
MSTRG.6039.1	Dxb_GLEAN_10004830	0.939555	6	3	2	novel-m0151-5p|novel-m0152-5p	0.0321267	RTase	Carnitine O-palmitoyltransferase 2, mitochondrial [Takifugu flavidus]
MSTRG.6039.1	Dxb_GLEAN_10007110	0.925875	6	3	2	novel-m0151-5p|novel-m0152-5p	0.0321267	COL9A1	PREDICTED: collagen alpha-3(IX) chain-like [Paralichthys olivaceus]
MSTRG.6039.1	Dxb_GLEAN_10007821	0.99358	6	3	3	novel-m0151-5p|novel-m0152-5p|novel-m0254-5p	0.000904977	SOCS3	suppressor of cytokine signaling 3, partial [Siniperca chuatsi]
MSTRG.6039.1	Dxb_GLEAN_10008124	0.971892	6	3	2	novel-m0151-5p|novel-m0152-5p	0.0321267	CBX7	LOW QUALITY PROTEIN: chromobox protein homolog 7-like [Cottoperca gobio]
MSTRG.6039.1	Dxb_GLEAN_10012343	0.984485	6	2	2	novel-m0151-5p|novel-m0152-5p	0.0113122	RGS13	regulator of G-protein signaling 21-like [Sander lucioperca]
MSTRG.6039.1	Dxb_GLEAN_10013067	0.961564	6	2	2	novel-m0151-5p|novel-m0152-5p	0.0113122	AMPD3	AMP deaminase 3-like isoform X1 [Seriola lalandi dorsalis]
MSTRG.6039.1	Dxb_GLEAN_10015000	0.953732	6	2	2	novel-m0151-5p|novel-m0152-5p	0.0113122	Fosl1	fos-related antigen 1 [Anabas testudineus]
MSTRG.6039.1	Dxb_GLEAN_10016658	0.939542	6	3	2	novel-m0151-5p|novel-m0152-5p	0.0321267	NFKBID	NF-kappa-B inhibitor delta I-kappa-B-delta [Collichthys lucidus]
MSTRG.6039.1	Dxb_GLEAN_10021506	0.940036	6	3	2	novel-m0151-5p|novel-m0152-5p	0.0321267	nr4a1	Nuclear receptor subfamily 4 group A member 1 [Collichthys lucidus]
MSTRG.6291.1	Dxb_GLEAN_10009946	0.934212	1	1	1	novel-m0254-5p	0.0192308	foxi1c	forkhead box protein I1c-like [Sparus aurata]
MSTRG.6291.1	Dxb_GLEAN_10010167	0.914295	1	1	1	novel-m0254-5p	0.0192308	GADD45B	growth arrest and DNA damage-inducible protein GADD45 beta-like [Parambassis ranga]
MSTRG.6291.1	Dxb_GLEAN_10010386	0.90169	1	1	1	novel-m0254-5p	0.0192308	Asb2	ankyrin repeat and SOCS box protein 2-like isoform X3 [Sander lucioperca]
MSTRG.6291.1	Dxb_GLEAN_10011976	0.998642	1	1	1	novel-m0254-5p	0.0192308	Cebpd	CCAAT/enhancer-binding protein delta [Mastacembelus armatus]
MSTRG.6291.1	Dxb_GLEAN_10012029	0.98496	1	2	1	novel-m0254-5p	0.0384615	Lama3	laminin subunit alpha-3 isoform X1 [Sander lucioperca]
MSTRG.6291.1	Dxb_GLEAN_10014392	0.941686	1	1	1	novel-m0254-5p	0.0192308	ARL4C	ADP-ribosylation factor-like protein 4C [Seriola dumerili]
MSTRG.6291.1	Dxb_GLEAN_10017683	0.9957	1	1	1	novel-m0254-5p	0.0192308	NEURL3	E3 ubiquitin-protein ligase NEURL3-like [Cottoperca gobio]
MSTRG.6291.1	Dxb_GLEAN_10017883	0.906283	1	1	1	novel-m0254-5p	0.0192308	Ank1	ankyrin-1 isoform X5 [Amphiprion ocellaris]
MSTRG.6291.1	Dxb_GLEAN_10019484	0.951704	1	2	1	novel-m0254-5p	0.0384615	Sp6	Transcription factor [Collichthys lucidus]
MSTRG.6291.1	Dxb_GLEAN_10020267	0.969041	1	1	1	novel-m0254-5p	0.0192308	Noct	nocturnin-like isoform X2 [Sander lucioperca]
MSTRG.6291.1	Dxb_GLEAN_10020578	0.995395	1	1	1	novel-m0254-5p	0.0192308	PTGS2	PREDICTED: prostaglandin G/H synthase 2 [Lates calcarifer]
MSTRG.7556.4	Dxb_GLEAN_10007821	0.911149	4	3	2	novel-m0151-5p|novel-m0152-5p	0.0132127	SOCS3	suppressor of cytokine signaling 3, partial [Siniperca chuatsi]
MSTRG.7556.4	Dxb_GLEAN_10012343	0.916594	4	2	2	novel-m0151-5p|novel-m0152-5p	0.00452489	RGS13	regulator of G-protein signaling 21-like [Sander lucioperca]
MSTRG.7556.4	Dxb_GLEAN_10013067	0.980712	4	2	2	novel-m0151-5p|novel-m0152-5p	0.00452489	AMPD3	AMP deaminase 3-like isoform X1 [Seriola lalandi dorsalis]
MSTRG.8551.1	Dxb_GLEAN_10009946	0.964045	1	1	1	novel-m0254-5p	0.0192308	foxi1c	forkhead box protein I1c-like [Sparus aurata]
MSTRG.8551.1	Dxb_GLEAN_10010167	0.936697	1	1	1	novel-m0254-5p	0.0192308	GADD45B	growth arrest and DNA damage-inducible protein GADD45 beta-like [Parambassis ranga]
MSTRG.8551.1	Dxb_GLEAN_10010386	0.916294	1	1	1	novel-m0254-5p	0.0192308	Asb2	ankyrin repeat and SOCS box protein 2-like isoform X3 [Sander lucioperca]
MSTRG.8551.1	Dxb_GLEAN_10011976	0.927513	1	1	1	novel-m0254-5p	0.0192308	Cebpd	CCAAT/enhancer-binding protein delta [Mastacembelus armatus]
MSTRG.8551.1	Dxb_GLEAN_10012029	0.97538	1	2	1	novel-m0254-5p	0.0384615	Lama3	laminin subunit alpha-3 isoform X1 [Sander lucioperca]
MSTRG.8551.1	Dxb_GLEAN_10014392	0.998537	1	1	1	novel-m0254-5p	0.0192308	ARL4C	ADP-ribosylation factor-like protein 4C [Seriola dumerili]
MSTRG.8551.1	Dxb_GLEAN_10017683	0.911102	1	1	1	novel-m0254-5p	0.0192308	NEURL3	E3 ubiquitin-protein ligase NEURL3-like [Cottoperca gobio]
MSTRG.8551.1	Dxb_GLEAN_10017883	0.938236	1	1	1	novel-m0254-5p	0.0192308	Ank1	ankyrin-1 isoform X5 [Amphiprion ocellaris]
MSTRG.8551.1	Dxb_GLEAN_10019484	0.940404	1	2	1	novel-m0254-5p	0.0384615	Sp6	Transcription factor [Collichthys lucidus]
MSTRG.8551.1	Dxb_GLEAN_10020267	0.970294	1	1	1	novel-m0254-5p	0.0192308	Noct	nocturnin-like isoform X2 [Sander lucioperca]
MSTRG.8551.1	Dxb_GLEAN_10020578	0.959963	1	1	1	novel-m0254-5p	0.0192308	PTGS2	PREDICTED: prostaglandin G/H synthase 2 [Lates calcarifer]
MSTRG.8593.2	Dxb_GLEAN_10002603	0.946982	1	1	1	novel-m0051-3p	0.0192308	myc	transcriptional regulator Myc-B-like isoform X2 [Sparus aurata]
MSTRG.8593.2	Dxb_GLEAN_10002859	0.970454	1	1	1	novel-m0051-3p	0.0192308	--	sterile alpha motif domain-containing protein 3-like [Astyanax mexicanus]
MSTRG.8593.2	Dxb_GLEAN_10003172	0.921988	1	2	1	novel-m0051-3p	0.0384615	plcd4	1-phosphatidylinositol 4,5-bisphosphate phosphodiesterase delta-4 isoform X1 [Mastacembelus armatus]
MSTRG.8593.2	Dxb_GLEAN_10003713	0.942814	1	1	1	novel-m0051-3p	0.0192308	CDKL2	cyclin-dependent kinase-like 5 [Sander lucioperca]
MSTRG.8593.2	Dxb_GLEAN_10004707	0.964775	1	2	1	novel-m0051-3p	0.0384615	Myh6	myosin-6-like [Amphiprion ocellaris]
MSTRG.8593.2	Dxb_GLEAN_10005129	0.997545	1	2	1	novel-m0051-3p	0.0384615	Klf4	Krueppel-like factor 4 isoform X2 [Sander lucioperca]
MSTRG.8593.2	Dxb_GLEAN_10005672	0.918109	1	1	1	novel-m0051-3p	0.0192308	ELOVL6	elongation of very long chain fatty acids protein 6-like [Seriola dumerili]
MSTRG.8593.2	Dxb_GLEAN_10009147	0.943144	1	1	1	novel-m0051-3p	0.0192308	ANKRD1	ankyrin repeat domain-containing protein 1 [Labrus bergylta]
MSTRG.8593.2	Dxb_GLEAN_10009904	0.91049	1	2	1	novel-m0051-3p	0.0384615	PRKD1	serine/threonine-protein kinase D1-like [Acanthochromis polyacanthus]
MSTRG.8593.2	Dxb_GLEAN_10010815	0.987716	1	2	1	novel-m0051-3p	0.0384615	EGR1	early growth response protein 1-like [Seriola dumerili]
MSTRG.8593.2	Dxb_GLEAN_10012520	0.918774	1	2	1	novel-m0051-3p	0.0384615	PAPPA2	pappalysin-2 [Perca flavescens]
MSTRG.8593.2	Dxb_GLEAN_10014405	0.945675	1	2	1	novel-m0051-3p	0.0384615	Enox1	PREDICTED: ecto-NOX disulfide-thiol exchanger 1 isoform X4 [Lepisosteus oculatus]
MSTRG.8593.2	Dxb_GLEAN_10014714	0.997805	1	1	1	novel-m0051-3p	0.0192308	dusp1-a	MAP kinase phosphatase 1 [Epinephelus coioides]
MSTRG.8593.2	Dxb_GLEAN_10014817	0.901194	1	1	1	novel-m0051-3p	0.0192308	ADAMTS3	PREDICTED: A disintegrin and metalloproteinase with thrombospondin motifs 2-like, partial [Notothenia coriiceps]
MSTRG.8593.2	Dxb_GLEAN_10016251	0.943295	1	1	1	novel-m0051-3p	0.0192308	pdzrn3b	PREDICTED: serine/arginine repetitive matrix protein 1-like [Austrofundulus limnaeus]
MSTRG.8593.2	Dxb_GLEAN_10019149	0.96517	1	1	1	novel-m0051-3p	0.0192308	TAAR1	trace amine-associated receptor 1-like [Perca flavescens]
MSTRG.8593.2	Dxb_GLEAN_10022068	0.986758	1	1	1	novel-m0051-3p	0.0192308	EPHA2	ephrin type-A receptor 2-like [Anarrhichthys ocellatus]
MSTRG.8593.3	Dxb_GLEAN_10009946	0.935866	1	1	1	novel-m0254-5p	0.0192308	foxi1c	forkhead box protein I1c-like [Sparus aurata]
MSTRG.8593.3	Dxb_GLEAN_10010386	0.956059	1	1	1	novel-m0254-5p	0.0192308	Asb2	ankyrin repeat and SOCS box protein 2-like isoform X3 [Sander lucioperca]
MSTRG.8593.3	Dxb_GLEAN_10011976	0.936148	1	1	1	novel-m0254-5p	0.0192308	Cebpd	CCAAT/enhancer-binding protein delta [Mastacembelus armatus]
MSTRG.8593.3	Dxb_GLEAN_10012029	0.983762	1	2	1	novel-m0254-5p	0.0384615	Lama3	laminin subunit alpha-3 isoform X1 [Sander lucioperca]
MSTRG.8593.3	Dxb_GLEAN_10014392	0.992169	1	1	1	novel-m0254-5p	0.0192308	ARL4C	ADP-ribosylation factor-like protein 4C [Seriola dumerili]
MSTRG.8593.3	Dxb_GLEAN_10017683	0.912402	1	1	1	novel-m0254-5p	0.0192308	NEURL3	E3 ubiquitin-protein ligase NEURL3-like [Cottoperca gobio]
MSTRG.8593.3	Dxb_GLEAN_10019484	0.980318	1	2	1	novel-m0254-5p	0.0384615	Sp6	Transcription factor [Collichthys lucidus]
MSTRG.8593.3	Dxb_GLEAN_10020267	0.992555	1	1	1	novel-m0254-5p	0.0192308	Noct	nocturnin-like isoform X2 [Sander lucioperca]
MSTRG.8593.3	Dxb_GLEAN_10020578	0.965893	1	1	1	novel-m0254-5p	0.0192308	PTGS2	PREDICTED: prostaglandin G/H synthase 2 [Lates calcarifer]
MSTRG.9225.1	Dxb_GLEAN_10003713	0.991087	2	1	1	novel-m0051-3p	0.0384615	CDKL2	cyclin-dependent kinase-like 5 [Sander lucioperca]
MSTRG.9225.1	Dxb_GLEAN_10005746	0.951859	2	1	1	novel-m0051-3p	0.0384615	Sema4g	semaphorin-4G [Cottoperca gobio]
MSTRG.9225.1	Dxb_GLEAN_10009159	0.930064	2	1	1	novel-m0313-3p	0.0384615	sult6b1	Sulfotransferase 6B1 [Channa argus]
MSTRG.9225.1	Dxb_GLEAN_10013270	0.920653	2	1	1	novel-m0051-3p	0.0384615	--	-
MSTRG.9225.1	Dxb_GLEAN_10014714	0.954213	2	1	1	novel-m0051-3p	0.0384615	dusp1-a	MAP kinase phosphatase 1 [Epinephelus coioides]
MSTRG.9225.1	Dxb_GLEAN_10014817	0.915379	2	1	1	novel-m0051-3p	0.0384615	ADAMTS3	PREDICTED: A disintegrin and metalloproteinase with thrombospondin motifs 2-like, partial [Notothenia coriiceps]
MSTRG.9225.1	Dxb_GLEAN_10016251	0.990152	2	1	1	novel-m0051-3p	0.0384615	pdzrn3b	PREDICTED: serine/arginine repetitive matrix protein 1-like [Austrofundulus limnaeus]
MSTRG.9225.1	Dxb_GLEAN_10018136	0.972089	2	1	1	novel-m0313-3p	0.0384615	--	epigen, partial [Epinephelus bruneus]
MSTRG.9225.1	Dxb_GLEAN_10019149	0.923886	2	1	1	novel-m0051-3p	0.0384615	TAAR1	trace amine-associated receptor 1-like [Perca flavescens]
MSTRG.9225.1	Dxb_GLEAN_10020432	0.903571	2	1	1	novel-m0051-3p	0.0384615	C1orf226	carboxyl-terminal PDZ ligand of neuronal nitric oxide synthase protein-like [Myripristis murdjan]
MSTRG.9225.1	Dxb_GLEAN_10022068	0.906841	2	1	1	novel-m0051-3p	0.0384615	EPHA2	ephrin type-A receptor 2-like [Anarrhichthys ocellatus]

## Sheet: Supplemental table 7
Supplemental table 7 Go enrichment analysis of DEGs from network
class	ID	Descrption	Pvalue	Qvalue
Biological Process	GO:0045444	fat cell differentiation	6.16799e-05	0.0569528
Biological Process	GO:0007519	skeletal muscle tissue development	0.000161948	0.0569528
Biological Process	GO:0006582	melanin metabolic process	0.000166135	0.0569528
Biological Process	GO:0031960	response to corticosteroid	0.000168499	0.0569528
Biological Process	GO:0060538	skeletal muscle organ development	0.00023989	0.0648663
Molecular Function	GO:0016716	oxidoreductase activity, acting on paired donors, with incorporation or reduction of molecular oxygen, another compound as one donor, and incorporation of one atom of oxygen	0.000309614	0.0523248
Biological Process	GO:0050931	pigment cell differentiation	0.000309739	0.0697945
Biological Process	GO:0046459	short-chain fatty acid metabolic process	0.000551667	0.106551
Biological Process	GO:0048066	developmental pigmentation	0.000786194	0.113358
Cellular Component	GO:0048770	pigment granule	0.00085058	0.120782
Biological Process	GO:0048869	cellular developmental process	0.000877981	0.113358
Biological Process	GO:0043542	endothelial cell migration	0.000935114	0.113358
Biological Process	GO:0030154	cell differentiation	0.000939697	0.113358
Biological Process	GO:0072330	monocarboxylic acid biosynthetic process	0.00119864	0.113358
Biological Process	GO:0032502	developmental process	0.00126856	0.113358
Biological Process	GO:0002237	response to molecule of bacterial origin	0.00127877	0.113358
Biological Process	GO:0010632	regulation of epithelial cell migration	0.00143956	0.113358
Biological Process	GO:0019748	secondary metabolic process	0.00147941	0.113358
Biological Process	GO:0014706	striated muscle tissue development	0.00178944	0.113358
Biological Process	GO:0010594	regulation of endothelial cell migration	0.00179988	0.113358
Biological Process	GO:0043534	blood vessel endothelial cell migration	0.00184828	0.113358
Biological Process	GO:0009617	response to bacterium	0.00195204	0.113358
Biological Process	GO:0010631	epithelial cell migration	0.00201358	0.113358
Biological Process	GO:0090132	epithelium migration	0.00204846	0.113358
Biological Process	GO:0032787	monocarboxylic acid metabolic process	0.00205596	0.113358
Biological Process	GO:0090130	tissue migration	0.0020838	0.113358
Biological Process	GO:0002521	leukocyte differentiation	0.00209613	0.113358
Biological Process	GO:0006570	tyrosine metabolic process	0.00230976	0.117921
Biological Process	GO:0044767	single-organism developmental process	0.00236068	0.117921
Biological Process	GO:0060537	muscle tissue development	0.00244216	0.117921
Biological Process	GO:0009888	tissue development	0.00262659	0.122453
Biological Process	GO:0006631	fatty acid metabolic process	0.00307908	0.135755
Biological Process	GO:0033059	cellular pigmentation	0.00328089	0.135755
Biological Process	GO:0042440	pigment metabolic process	0.00328089	0.135755
Biological Process	GO:0048522	positive regulation of cellular process	0.00342374	0.135755
Biological Process	GO:0007517	muscle organ development	0.00342716	0.135755
Biological Process	GO:0010634	positive regulation of epithelial cell migration	0.00357022	0.135755
Biological Process	GO:0070228	regulation of lymphocyte apoptotic process	0.00361479	0.135755
Biological Process	GO:0034405	response to fluid shear stress	0.00398369	0.138581
Biological Process	GO:0043535	regulation of blood vessel endothelial cell migration	0.00398369	0.138581
Biological Process	GO:0006979	response to oxidative stress	0.00415056	0.138581
Cellular Component	GO:0043256	laminin complex	0.00415341	0.215613
Biological Process	GO:0001676	long-chain fatty acid metabolic process	0.00419456	0.138581
Biological Process	GO:2000106	regulation of leukocyte apoptotic process	0.00436933	0.138581
Biological Process	GO:0043473	pigmentation	0.00447095	0.138581
Biological Process	GO:0035879	plasma membrane lactate transport	0.00451002	0.138581
Biological Process	GO:0070234	positive regulation of T cell apoptotic process	0.00451002	0.138581
Cellular Component	GO:0005605	basal lamina	0.00455521	0.215613
Biological Process	GO:0044851	hair cycle phase	0.00477157	0.141077
Biological Process	GO:0009913	epidermal cell differentiation	0.00479997	0.141077
Biological Process	GO:0006633	fatty acid biosynthetic process	0.00623847	0.179456
Biological Process	GO:0048753	pigment granule organization	0.00654339	0.184305
Molecular Function	GO:0000982	transcription factor activity, RNA polymerase II core promoter proximal region sequence-specific binding	0.00677429	0.356265
Biological Process	GO:0001816	cytokine production	0.00696451	0.192164
Biological Process	GO:0050673	epithelial cell proliferation	0.00729402	0.196769
Biological Process	GO:0006636	unsaturated fatty acid biosynthetic process	0.00752491	0.196769
Biological Process	GO:0008544	epidermis development	0.00756805	0.196769
Biological Process	GO:0070227	lymphocyte apoptotic process	0.0085686	0.213473
Biological Process	GO:0015727	lactate transport	0.00899999	0.213473
Biological Process	GO:0035873	lactate transmembrane transport	0.00899999	0.213473
Biological Process	GO:0070230	positive regulation of lymphocyte apoptotic process	0.00899999	0.213473
Biological Process	GO:2000108	positive regulation of leukocyte apoptotic process	0.00899999	0.213473
Biological Process	GO:0016053	organic acid biosynthetic process	0.00936697	0.214646
Biological Process	GO:0046394	carboxylic acid biosynthetic process	0.00936697	0.214646
Biological Process	GO:0002573	myeloid leukocyte differentiation	0.00972145	0.215465
Biological Process	GO:1902105	regulation of leukocyte differentiation	0.00972145	0.215465
Biological Process	GO:0061061	muscle structure development	0.00989722	0.215823
Molecular Function	GO:0001637	G-protein coupled chemoattractant receptor activity	0.0100593	0.356265
Biological Process	GO:0042221	response to chemical	0.0103316	0.220363
Biological Process	GO:1902531	regulation of intracellular signal transduction	0.0104314	0.220363
Biological Process	GO:0071887	leukocyte apoptotic process	0.0108378	0.220997
Biological Process	GO:0044707	single-multicellular organism process	0.0112012	0.220997
Biological Process	GO:0000302	response to reactive oxygen species	0.0112265	0.220997
Biological Process	GO:0002761	regulation of myeloid leukocyte differentiation	0.0112649	0.220997
Biological Process	GO:0032635	interleukin-6 production	0.0114422	0.220997
Biological Process	GO:0032675	regulation of interleukin-6 production	0.0114422	0.220997
Biological Process	GO:0048518	positive regulation of biological process	0.0116189	0.22125
Molecular Function	GO:0016702	oxidoreductase activity, acting on single donors with incorporation of molecular oxygen, incorporation of two atoms of oxygen	0.0118967	0.356265
Biological Process	GO:0044283	small molecule biosynthetic process	0.0119723	0.223378
Biological Process	GO:0009072	aromatic amino acid family metabolic process	0.0120611	0.223378
Biological Process	GO:0006629	lipid metabolic process	0.0122826	0.224406
Biological Process	GO:0018958	phenol-containing compound metabolic process	0.0134441	0.227643
Biological Process	GO:0010383	cell wall polysaccharide metabolic process	0.01347	0.227643
Biological Process	GO:0014738	regulation of muscle hyperplasia	0.01347	0.227643
Biological Process	GO:0014900	muscle hyperplasia	0.01347	0.227643
Biological Process	GO:0019566	arabinose metabolic process	0.01347	0.227643
Biological Process	GO:0046898	response to cycloheximide	0.01347	0.227643
Biological Process	GO:0010033	response to organic substance	0.0140221	0.234048
Cellular Component	GO:0005667	transcription factor complex	0.0163895	0.581825
Molecular Function	GO:0043566	structure-specific DNA binding	0.016702	0.356265
Biological Process	GO:0048545	response to steroid hormone	0.0174869	0.272225
Biological Process	GO:0002138	retinoic acid biosynthetic process	0.0179201	0.272225
Biological Process	GO:0018076	N-terminal peptidyl-lysine acetylation	0.0179201	0.272225
Biological Process	GO:0042494	detection of bacterial lipoprotein	0.0179201	0.272225
Biological Process	GO:0042573	retinoic acid metabolic process	0.0179201	0.272225
Biological Process	GO:0070340	detection of bacterial lipopeptide	0.0179201	0.272225
Biological Process	GO:0071220	cellular response to bacterial lipoprotein	0.0179201	0.272225
Biological Process	GO:0071221	cellular response to bacterial lipopeptide	0.0179201	0.272225
Biological Process	GO:0051896	regulation of protein kinase B signaling	0.0184778	0.274948
Biological Process	GO:0030855	epithelial cell differentiation	0.0186753	0.274948
Biological Process	GO:0009725	response to hormone	0.0187095	0.274948
Molecular Function	GO:0046983	protein dimerization activity	0.0196645	0.356265
Biological Process	GO:0045637	regulation of myeloid cell differentiation	0.0200834	0.291965
Biological Process	GO:0043491	protein kinase B signaling	0.0209142	0.298327
Biological Process	GO:1903706	regulation of hemopoiesis	0.0209823	0.298327
Biological Process	GO:0060429	epithelium development	0.0214223	0.298327
Biological Process	GO:0010595	positive regulation of endothelial cell migration	0.0221755	0.298327
Molecular Function	GO:0016701	oxidoreductase activity, acting on single donors with incorporation of molecular oxygen	0.0221983	0.356265
Molecular Function	GO:0034483	heparan sulfate sulfotransferase activity	0.0221983	0.356265
Cellular Component	GO:0030665	clathrin-coated vesicle membrane	0.0222382	0.612555
Biological Process	GO:0002902	regulation of B cell apoptotic process	0.0223505	0.298327
Biological Process	GO:0016045	detection of bacterium	0.0223505	0.298327
Biological Process	GO:0032490	detection of molecule of bacterial origin	0.0223505	0.298327
Biological Process	GO:0098543	detection of other organism	0.0223505	0.298327
Biological Process	GO:0048583	regulation of response to stimulus	0.0225069	0.298327
Molecular Function	GO:0047623	adenosine-phosphate deaminase activity	0.0228132	0.356265
Biological Process	GO:0016055	Wnt signaling pathway	0.0233775	0.306858
Biological Process	GO:0009719	response to endogenous stimulus	0.0238308	0.309392
Molecular Function	GO:0019111	phenanthrol sulfotransferase activity	0.0238879	0.356265
Biological Process	GO:0023056	positive regulation of signaling	0.0240282	0.309392
Biological Process	GO:0010038	response to metal ion	0.0243738	0.31088
Biological Process	GO:0051707	response to other organism	0.0247356	0.311384
Biological Process	GO:0032501	multicellular organismal process	0.0248739	0.311384
Molecular Function	GO:0000981	RNA polymerase II transcription factor activity, sequence-specific DNA binding	0.0256153	0.356265
Biological Process	GO:0043207	response to external biotic stimulus	0.0264412	0.323274
Biological Process	GO:0009595	detection of biotic stimulus	0.0267611	0.323274
Biological Process	GO:0098581	detection of external biotic stimulus	0.0267611	0.323274
Biological Process	GO:0044255	cellular lipid metabolic process	0.0269943	0.323274
Biological Process	GO:0046683	response to organophosphorus	0.0272544	0.323274
Biological Process	GO:0002526	acute inflammatory response	0.0272836	0.323274
Biological Process	GO:0001667	ameboidal-type cell migration	0.0274974	0.323274
Biological Process	GO:0009891	positive regulation of biosynthetic process	0.0280239	0.32637
Cellular Component	GO:0030136	clathrin-coated vesicle	0.0283835	0.612555
Molecular Function	GO:0044212	transcription regulatory region DNA binding	0.0290556	0.356265
Biological Process	GO:0009168	purine ribonucleoside monophosphate biosynthetic process	0.029082	0.32637
Biological Process	GO:0019217	regulation of fatty acid metabolic process	0.029082	0.32637
Biological Process	GO:0010647	positive regulation of cell communication	0.0296046	0.32637
Biological Process	GO:0098602	single organism cell adhesion	0.0303361	0.32637
Biological Process	GO:0035556	intracellular signal transduction	0.030524	0.32637
Biological Process	GO:0048856	anatomical structure development	0.0307827	0.32637
Biological Process	GO:0019368	fatty acid elongation, unsaturated fatty acid	0.0311521	0.32637
Biological Process	GO:0032493	response to bacterial lipoprotein	0.0311521	0.32637
Biological Process	GO:0034238	macrophage fusion	0.0311521	0.32637
Biological Process	GO:0034239	regulation of macrophage fusion	0.0311521	0.32637
Biological Process	GO:0070339	response to bacterial lipopeptide	0.0311521	0.32637
Biological Process	GO:0008610	lipid biosynthetic process	0.0312239	0.32637
Biological Process	GO:0031032	actomyosin structure organization	0.0312887	0.32637
Biological Process	GO:0009607	response to biotic stimulus	0.0313817	0.32637
Biological Process	GO:0048878	chemical homeostasis	0.0317264	0.326384
Biological Process	GO:0009127	purine nucleoside monophosphate biosynthetic process	0.0318659	0.326384
Molecular Function	GO:0016705	oxidoreductase activity, acting on paired donors, with incorporation or reduction of molecular oxygen	0.0323955	0.356265
Cellular Component	GO:0044421	extracellular region part	0.0329626	0.612555
Biological Process	GO:0043433	negative regulation of sequence-specific DNA binding transcription factor activity	0.033778	0.340624
Biological Process	GO:0033993	response to lipid	0.0341317	0.340624
Cellular Component	GO:0005604	basement membrane	0.0351249	0.612555
Biological Process	GO:0001516	prostaglandin biosynthetic process	0.0355236	0.340624
Biological Process	GO:0031392	regulation of prostaglandin biosynthetic process	0.0355236	0.340624
Biological Process	GO:0032715	negative regulation of interleukin-6 production	0.0355236	0.340624
Biological Process	GO:0046457	prostanoid biosynthetic process	0.0355236	0.340624
Biological Process	GO:0060413	atrial septum morphogenesis	0.0355236	0.340624
Biological Process	GO:0070232	regulation of T cell apoptotic process	0.0355236	0.340624
Biological Process	GO:2001279	regulation of unsaturated fatty acid biosynthetic process	0.0355236	0.340624
Biological Process	GO:0030097	hemopoiesis	0.0371581	0.353787
Molecular Function	GO:0000976	transcription regulatory region sequence-specific DNA binding	0.0379672	0.356265
Biological Process	GO:0008283	cell proliferation	0.0384571	0.354684
Biological Process	GO:0009411	response to UV	0.0387483	0.354684
Biological Process	GO:0033559	unsaturated fatty acid metabolic process	0.0387483	0.354684
Cellular Component	GO:0005576	extracellular region	0.0388239	0.612555
Molecular Function	GO:0000977	RNA polymerase II regulatory region sequence-specific DNA binding	0.0389323	0.356265
Molecular Function	GO:0008146	sulfotransferase activity	0.0391605	0.356265
Biological Process	GO:0048584	positive regulation of response to stimulus	0.0394737	0.354684
Biological Process	GO:0001783	B cell apoptotic process	0.0398757	0.354684
Biological Process	GO:0002675	positive regulation of acute inflammatory response	0.0398757	0.354684
Biological Process	GO:0006474	N-terminal protein amino acid acetylation	0.0398757	0.354684
Biological Process	GO:0030497	fatty acid elongation	0.0398757	0.354684
Biological Process	GO:0043536	positive regulation of blood vessel endothelial cell migration	0.0398757	0.354684
Biological Process	GO:0060142	regulation of syncytium formation by plasma membrane fusion	0.0398757	0.354684
Molecular Function	GO:0001012	RNA polymerase II regulatory region DNA binding	0.0406902	0.356265
Biological Process	GO:0007275	multicellular organism development	0.0408324	0.357902
Biological Process	GO:0042981	regulation of apoptotic process	0.0411493	0.357902
Biological Process	GO:0048729	tissue morphogenesis	0.0412047	0.357902
Biological Process	GO:0001817	regulation of cytokine production	0.0419706	0.357902
Biological Process	GO:0002009	morphogenesis of an epithelium	0.0426811	0.357902
Biological Process	GO:0043067	regulation of programmed cell death	0.0430294	0.357902
Biological Process	GO:0030335	positive regulation of cell migration	0.0432834	0.357902
Molecular Function	GO:1990837	sequence-specific double-stranded DNA binding	0.0433985	0.356265
Biological Process	GO:2000147	positive regulation of cell motility	0.0439046	0.357902
Biological Process	GO:0006509	membrane protein ectodomain proteolysis	0.0442084	0.357902
Biological Process	GO:0032717	negative regulation of interleukin-8 production	0.0442084	0.357902
Biological Process	GO:0034616	response to laminar fluid shear stress	0.0442084	0.357902
Biological Process	GO:0042441	eye pigment metabolic process	0.0442084	0.357902
Biological Process	GO:0043324	pigment metabolic process involved in developmental pigmentation	0.0442084	0.357902
Biological Process	GO:0043474	pigment metabolic process involved in pigmentation	0.0442084	0.357902
Biological Process	GO:0044036	cell wall macromolecule metabolic process	0.0442084	0.357902
Biological Process	GO:0010035	response to inorganic substance	0.0445064	0.358171
Biological Process	GO:0009156	ribonucleoside monophosphate biosynthetic process	0.0450545	0.360436
Molecular Function	GO:0036041	long-chain fatty acid binding	0.0451135	0.356265
Biological Process	GO:0007165	signal transduction	0.0459832	0.364254
Biological Process	GO:0019752	carboxylic acid metabolic process	0.0460706	0.364254
Molecular Function	GO:0003700	transcription factor activity, sequence-specific DNA binding	0.0465213	0.356265
Biological Process	GO:0051272	positive regulation of cellular component movement	0.0470774	0.366488
Biological Process	GO:0016102	diterpenoid biosynthetic process	0.0485218	0.366488
Biological Process	GO:0031065	positive regulation of histone deacetylation	0.0485218	0.366488
Biological Process	GO:0038089	positive regulation of cell migration by vascular endothelial growth factor signaling pathway	0.0485218	0.366488
Biological Process	GO:0043537	negative regulation of blood vessel endothelial cell migration	0.0485218	0.366488
Biological Process	GO:0072575	epithelial cell proliferation involved in liver morphogenesis	0.0485218	0.366488
Biological Process	GO:0072576	liver morphogenesis	0.0485218	0.366488
Biological Process	GO:0090312	positive regulation of protein deacetylation	0.0485218	0.366488
Biological Process	GO:0009967	positive regulation of signal transduction	0.0492575	0.369978
Molecular Function	GO:0003690	double-stranded DNA binding	0.0492999	0.356265
Molecular Function	GO:0000975	regulatory region DNA binding	0.049472	0.356265
Molecular Function	GO:0001134	transcription factor activity, transcription factor recruiting	0.049513	0.356265

## Sheet: Supplemental table 8
Supplemental table 8 KEGG enrichment analysis of DEGs from network
KEGG_A_class	KEGG_B_class	Pathway	Pvalue	Qvalue	Pathway ID
Human Diseases	Cancers	Small cell lung cancer	0.00312298	0.543398	ko05222
Environmental Information Processing	Signaling molecules and interaction	Viral protein interaction with cytokine and cytokine receptor	0.0143586	0.666371	ko04061
Environmental Information Processing	Signaling molecules and interaction	ECM-receptor interaction	0.0158664	0.666371	ko04512
Environmental Information Processing	Signal transduction	PI3K-Akt signaling pathway	0.0214753	0.666371	ko04151
Environmental Information Processing	Signal transduction	MAPK signaling pathway	0.0217178	0.666371	ko04010
Human Diseases	Infectious diseases	Kaposi sarcoma-associated herpesvirus infection	0.0252441	0.666371	ko05167
Environmental Information Processing	Signal transduction	NF-kappa B signaling pathway	0.02837	0.666371	ko04064
Organismal Systems	Immune system	IL-17 signaling pathway	0.0307058	0.666371	ko04657
Metabolism	Amino acid metabolism	Tyrosine metabolism	0.0344674	0.666371	ko00350
Human Diseases	Cancers	Thyroid cancer	0.0395667	0.667435	ko05216
Organismal Systems	Immune system	Toll-like receptor signaling pathway	0.0421942	0.667435	ko04620
Human Diseases	Cancers	Bladder cancer	0.0505531	0.690404	ko05219
Organismal Systems	Immune system	Chemokine signaling pathway	0.0535171	0.690404	ko04062
Human Diseases	Cancers	Colorectal cancer	0.0555498	0.690404	ko05210
Environmental Information Processing	Signal transduction	TNF signaling pathway	0.0686977	0.721562	ko04668
Organismal Systems	Digestive system	Cholesterol metabolism	0.0704004	0.721562	ko04979
Organismal Systems	Digestive system	Protein digestion and absorption	0.073709	0.721562	ko04974
Cellular Processes	Cell growth and death	Cellular senescence	0.074832	0.721562	ko04218
Organismal Systems	Development	Osteoclast differentiation	0.0788805	0.721562	ko04380
Human Diseases	Endocrine and metabolic diseases	AGE-RAGE signaling pathway in diabetic complications	0.0964572	0.721562	ko04933
Human Diseases	Infectious diseases	Human papillomavirus infection	0.099658	0.721562	ko05165
Environmental Information Processing	Signal transduction	Jak-STAT signaling pathway	0.101085	0.721562	ko04630
Human Diseases	Infectious diseases	Pertussis	0.110383	0.721562	ko05133
Human Diseases	Infectious diseases	Amoebiasis	0.125506	0.721562	ko05146
Human Diseases	Cancers	Endometrial cancer	0.127349	0.721562	ko05213
Metabolism	Metabolism of terpenoids and polyketides	Terpenoid backbone biosynthesis	0.129133	0.721562	ko00900
Organismal Systems	Endocrine system	Growth hormone synthesis, secretion and action	0.131923	0.721562	ko04935
Human Diseases	Infectious diseases	Salmonella infection	0.138487	0.721562	ko05132
Human Diseases	Infectious diseases	HTLV-I infection	0.138487	0.721562	ko05166
Organismal Systems	Endocrine system	Thyroid hormone signaling pathway	0.143761	0.721562	ko04919
Metabolism	Glycan biosynthesis and metabolism	Glycosphingolipid biosynthesis - globo and isoglobo series	0.144075	0.721562	ko00603
Human Diseases	Infectious diseases	Influenza A	0.145098	0.721562	ko05164
Organismal Systems	Endocrine system	Prolactin signaling pathway	0.146869	0.721562	ko04917
Cellular Processes	Cell growth and death	Apoptosis	0.149135	0.721562	ko04210
Metabolism	Glycan biosynthesis and metabolism	Glycosphingolipid biosynthesis - ganglio series	0.158766	0.721562	ko00604
Human Diseases	Infectious diseases	Hepatitis C	0.161462	0.721562	ko05160
Human Diseases	Cancers	Breast cancer	0.167041	0.721562	ko05224
Organismal Systems	Digestive system	Vitamin digestion and absorption	0.173208	0.721562	ko04977
Human Diseases	Cancers	Chronic myeloid leukemia	0.175134	0.721562	ko05220
Human Diseases	Infectious diseases	Human cytomegalovirus infection	0.175403	0.721562	ko05163
Human Diseases	Infectious diseases	Hepatitis B	0.175515	0.721562	ko05161
Cellular Processes	Cellular community - eukaryotes	Focal adhesion	0.177676	0.721562	ko04510
Human Diseases	Cancers	Pathways in cancer	0.189293	0.721562	ko05200
Organismal Systems	Nervous system	Synaptic vesicle cycle	0.191663	0.721562	ko04721
Metabolism	Lipid metabolism	Fatty acid elongation	0.201366	0.721562	ko00062
Metabolism	Glycan biosynthesis and metabolism	Glycosaminoglycan biosynthesis - keratan sulfate	0.201366	0.721562	ko00533
Environmental Information Processing	Signal transduction	Hedgehog signaling pathway - fly	0.201366	0.721562	ko04341
Metabolism	Glycan biosynthesis and metabolism	Glycosaminoglycan biosynthesis - heparan sulfate / heparin	0.205967	0.721562	ko00534
Human Diseases	Neurodegenerative diseases	Prion diseases	0.205967	0.721562	ko05020
Environmental Information Processing	Signaling molecules and interaction	Cytokine-cytokine receptor interaction	0.209059	0.721562	ko04060
Environmental Information Processing	Signal transduction	ErbB signaling pathway	0.212607	0.721562	ko04012
Metabolism	Glycan biosynthesis and metabolism	Mucin type O-glycan biosynthesis	0.228582	0.721562	ko00512
Metabolism	Lipid metabolism	Biosynthesis of unsaturated fatty acids	0.228582	0.721562	ko01040
Human Diseases	Cancers	MicroRNAs in cancer	0.233208	0.721562	ko05206
Human Diseases	Immune diseases	Rheumatoid arthritis	0.233773	0.721562	ko05323
Environmental Information Processing	Signaling molecules and interaction	Cell adhesion molecules (CAMs)	0.237796	0.721562	ko04514
Human Diseases	Infectious diseases	Pathogenic Escherichia coli infection	0.241239	0.721562	ko05130
Human Diseases	Infectious diseases	Leishmaniasis	0.246542	0.721562	ko05140
Organismal Systems	Endocrine system	Melanogenesis	0.252939	0.721562	ko04916
Human Diseases	Cardiovascular diseases	Viral myocarditis	0.252939	0.721562	ko05416
Human Diseases	Cancers	Transcriptional misregulation in cancers	0.259413	0.721562	ko05202
Cellular Processes	Cell growth and death	Cell cycle	0.263612	0.721562	ko04110
Organismal Systems	Endocrine system	Aldosterone synthesis and secretion	0.265748	0.721562	ko04925
Organismal Systems	Immune system	C-type lectin receptor signaling pathway	0.27002	0.721562	ko04625
Organismal Systems	Environmental adaptation	Circadian entrainment	0.274291	0.721562	ko04713
Organismal Systems	Immune system	Toll and Imd signaling pathway	0.284461	0.721562	ko04624
Human Diseases	Infectious diseases	Chagas disease (American trypanosomiasis)	0.289236	0.721562	ko05142
Human Diseases	Cancers	Chemical carcinogenesis	0.292697	0.721562	ko05204
Organismal Systems	Nervous system	Serotonergic synapse	0.295633	0.721562	ko04726
Human Diseases	Infectious diseases	Measles	0.302024	0.721562	ko05162
Human Diseases	Immune diseases	Graft-versus-host disease	0.304877	0.721562	ko05332
Human Diseases	Infectious diseases	Epstein-Barr virus infection	0.309702	0.721562	ko05169
Human Diseases	Infectious diseases	Toxoplasmosis	0.312655	0.721562	ko05145
Metabolism	Lipid metabolism	Arachidonic acid metabolism	0.316851	0.721562	ko00590
Organismal Systems	Endocrine system	Parathyroid hormone synthesis, secretion and action	0.31902	0.721562	ko04928
Environmental Information Processing	Signal transduction	Hedgehog signaling pathway	0.32472	0.721562	ko04340
Human Diseases	Infectious diseases	Malaria	0.32472	0.721562	ko05144
Organismal Systems	Excretory system	Vasopressin-regulated water reabsorption	0.328622	0.721562	ko04962
Human Diseases	Cancers	Proteoglycans in cancer	0.344577	0.721562	ko05205
Organismal Systems	Endocrine system	Ovarian Steroidogenesis	0.351569	0.721562	ko04913
Human Diseases	Endocrine and metabolic diseases	Non-alcoholic fatty liver disease (NAFLD)	0.354811	0.721562	ko04932
Metabolism	Carbohydrate metabolism	Amino sugar and nucleotide sugar metabolism	0.355318	0.721562	ko00520
Cellular Processes	Cellular community - eukaryotes	Signaling pathways regulating pluripotency of stem cells	0.358984	0.721562	ko04550
Metabolism	Metabolism of cofactors and vitamins	Retinol metabolism	0.359046	0.721562	ko00830
Organismal Systems	Endocrine system	Insulin signaling pathway	0.363148	0.721562	ko04910
Human Diseases	Cardiovascular diseases	Fluid shear stress and atherosclerosis	0.363148	0.721562	ko05418
Human Diseases	Infectious disease: bacterial	Yersinia infection	0.367302	0.721562	ko05135
Organismal Systems	Immune system	Complement and coagulation cascades	0.370102	0.721562	ko04610
Human Diseases	Endocrine and metabolic diseases	Type I diabetes mellitus	0.370102	0.721562	ko04940
Human Diseases	Endocrine and metabolic diseases	Type II diabetes mellitus	0.373746	0.721562	ko04930
Environmental Information Processing	Signal transduction	Hippo signaling pathway -fly	0.377368	0.721562	ko04391
Metabolism	Global and overview maps	Fatty acid metabolism	0.388114	0.734042	ko01212
Metabolism	Nucleotide metabolism	Pyrimidine metabolism	0.402159	0.74475	ko00240
Human Diseases	Cancers	Gastric cancer	0.408256	0.74475	ko05226
Human Diseases	Cancers	Basal cell carcinoma	0.415886	0.74475	ko05217
Environmental Information Processing	Signal transduction	VEGF signaling pathway	0.429304	0.74475	ko04370
Organismal Systems	Immune system	RIG-I-like receptor signaling pathway	0.429304	0.74475	ko04622
Organismal Systems	Endocrine system	PPAR signaling pathway	0.435899	0.74475	ko03320
Human Diseases	Cancers	Hepatocellular carcinoma	0.436188	0.74475	ko05225
Human Diseases	Infectious diseases	Legionellosis	0.439168	0.74475	ko05134
Cellular Processes	Cell growth and death	p53 signaling pathway	0.442419	0.74475	ko04115
Organismal Systems	Immune system	Antigen processing and presentation	0.448865	0.74475	ko04612
Cellular Processes	Transport and catabolism	Phagosome	0.459578	0.74475	ko04145
Organismal Systems	Endocrine system	Regulation of lipolysis in adipocyte	0.464661	0.74475	ko04923
Human Diseases	Cancers	Acute myeloid leukemia	0.470855	0.74475	ko05221
Organismal Systems	Development	Axon guidance	0.47107	0.74475	ko04360
Organismal Systems	Endocrine system	Adipocytokine signaling pathway	0.480013	0.74475	ko04920
Organismal Systems	Endocrine system	Cortisol synthesis and secretion	0.480013	0.74475	ko04927
Organismal Systems	Endocrine system	Oxytocin signaling pathway	0.484298	0.74475	ko04921
Human Diseases	Substance dependence	Amphetamine addiction	0.486031	0.74475	ko05031
Human Diseases	Immune diseases	Allograft rejection	0.486031	0.74475	ko05330
Organismal Systems	Digestive system	Bile secretion	0.491982	0.74475	ko04976
Human Diseases	Immune diseases	Autoimmune thyroid disease	0.494931	0.74475	ko05320
Organismal Systems	Endocrine system	Thyroid hormone synthesis	0.50078	0.74475	ko04918
Human Diseases	Infectious diseases	Epithelial cell signaling in Helicobacter pylori infection	0.50078	0.74475	ko05120
Human Diseases	Cancers	Melanoma	0.50078	0.74475	ko05218
Human Diseases	Cancers	Non-small cell lung cancer	0.50078	0.74475	ko05223
Human Diseases	Infectious diseases	Tuberculosis	0.506508	0.746885	ko05152
Human Diseases	Cancers	Central carbon metabolism in cancer	0.515113	0.753191	ko05230
Human Diseases	Cancers	Glioma	0.523518	0.759101	ko05214
Organismal Systems	Immune system	Th1 and Th2 cell differentiation	0.545237	0.781407	ko04658
Metabolism	Carbohydrate metabolism	Inositol phosphate metabolism	0.547883	0.781407	ko00562
Cellular Processes	Cellular community - eukaryotes	Tight junction	0.554231	0.784034	ko04530
Human Diseases	Cancers	Pancreatic cancer	0.560886	0.787049	ko05212
Human Diseases	Infectious disease: viral	Human immunodeficiency virus 1 infection	0.571087	0.794159	ko05170
Environmental Information Processing	Signal transduction	TGF-beta signaling pathway	0.592998	0.794159	ko04350
Human Diseases	Cancer: overview	PD-L1 expression and PD-1 checkpoint pathway in cancer	0.595371	0.794159	ko05235
Human Diseases	Drug resistance	Endocrine resistance	0.597729	0.794159	ko01522
Human Diseases	Substance dependence	Morphine addiction	0.597729	0.794159	ko05032
Environmental Information Processing	Signal transduction	Rap1 signaling pathway	0.601866	0.794159	ko04015
Organismal Systems	Endocrine system	Insulin secretion	0.602406	0.794159	ko04911
Organismal Systems	Immune system	T cell receptor signaling pathway	0.604725	0.794159	ko04660
Organismal Systems	Circulatory system	Cardiac muscle contraction	0.60703	0.794159	ko04260
Organismal Systems	Endocrine system	GnRH signaling pathway	0.611601	0.794168	ko04912
Organismal Systems	Immune system	B cell receptor signaling pathway	0.618359	0.796996	ko04662
Organismal Systems	Nervous system	GABAergic synapse	0.625002	0.797122	ko04727
Organismal Systems	Development and regeneration	Axon regeneration	0.635822	0.797122	ko04361
Environmental Information Processing	Signaling molecules and interaction	Neuroactive ligand-receptor interaction	0.636967	0.797122	ko04080
Organismal Systems	Immune system	Th17 cell differentiation	0.642166	0.797122	ko04659
Organismal Systems	Digestive system	Pancreatic secretion	0.646335	0.797122	ko04972
Metabolism	Global and overview maps	Metabolic pathways	0.652664	0.797122	ko01100
Environmental Information Processing	Signal transduction	Phosphatidylinositol signaling system	0.658557	0.797122	ko04070
Human Diseases	Infectious diseases	Shigellosis	0.662684	0.797122	ko05131
Genetic Information Processing	Folding, sorting and degradation	Ubiquitin mediated proteolysis	0.664512	0.797122	ko04120
Human Diseases	Cancers	Choline metabolism in cancer	0.67421	0.797122	ko05231
Human Diseases	Cardiovascular diseases	Hypertrophic cardiomyopathy (HCM)	0.67421	0.797122	ko05410
Human Diseases	Infectious diseases	Herpes simplex infection	0.675019	0.797122	ko05168
Human Diseases	Endocrine and metabolic diseases	Insulin resistance	0.678012	0.797122	ko04931
Environmental Information Processing	Signal transduction	AMPK signaling pathway	0.687327	0.799095	ko04152
Cellular Processes	Transport and catabolism	Endocytosis	0.690908	0.799095	ko04144
Organismal Systems	Endocrine system	Estrogen signaling pathway	0.708616	0.799095	ko04915
Organismal Systems	Nervous system	Retrograde endocannabinoid signaling	0.715391	0.799095	ko04723
Organismal Systems	Endocrine system	Relaxin signaling pathway	0.715391	0.799095	ko04926
Environmental Information Processing	Signal transduction	FoxO signaling pathway	0.71872	0.799095	ko04068
Organismal Systems	Nervous system	Glutamatergic synapse	0.71872	0.799095	ko04724
Environmental Information Processing	Signal transduction	Apelin signaling pathway	0.72201	0.799095	ko04371
Metabolism	Nucleotide metabolism	Purine metabolism	0.726876	0.799095	ko00230
Organismal Systems	Immune system	Leukocyte transendothelial migration	0.726876	0.799095	ko04670
Environmental Information Processing	Signal transduction	Hippo signaling pathway	0.733233	0.799095	ko04390
Organismal Systems	Immune system	NOD-like receptor signaling pathway	0.7348	0.799095	ko04621
Organismal Systems	Nervous system	Cholinergic synapse	0.751445	0.804515	ko04725
Organismal Systems	Nervous system	Dopaminergic synapse	0.752907	0.804515	ko04728
Human Diseases	Cardiovascular diseases	Dilated cardiomyopathy (DCM)	0.758668	0.804515	ko05414
Human Diseases	Endocrine and metabolic diseases	Cushing syndrome	0.760088	0.804515	ko04934
Environmental Information Processing	Signal transduction	Wnt signaling pathway	0.762902	0.804515	ko04310
Organismal Systems	Circulatory system	Adrenergic signaling in cardiomyocytes	0.806074	0.844921	ko04261
Human Diseases	Cancers	Viral carcinogenesis	0.842437	0.877749	ko05203
Environmental Information Processing	Signal transduction	Phospholipase D signaling pathway	0.848861	0.879177	ko04072
Environmental Information Processing	Signal transduction	cGMP - PKG signaling pathway	0.855026	0.880323	ko04022
Environmental Information Processing	Signal transduction	Ras signaling pathway	0.86899	0.8866	ko04014
Human Diseases	Neurodegenerative diseases	Huntington disease	0.871313	0.8866	ko05016
Environmental Information Processing	Signal transduction	cAMP signaling pathway	0.904	0.914512	ko04024
Environmental Information Processing	Signal transduction	Calcium signaling pathway	0.914859	0.920147	ko04020
Human Diseases	Neurodegenerative diseases	Alzheimer disease	0.942114	0.942114	ko05010
